# Supplementary material for: Immune Landscape and Classification in Lung Adenocarcinoma Based on a Novel Cell Cycle Checkpoints Related Signature for Predicting Prognosis and Therapeutic Response
Source: Front Genet. 2022 May 11;13:908104. doi: 10.3389/fgene.2022.908104 (PMC9130860; doi:10.3389/fgene.2022.908104)
Supplement: Supplementary file 2 [file Table3.XLSX]

## Sheet: Sheet1
Supplementary Table 2. GO analysis of differentially expressed genes
ID	Description	GeneRatio	BgRatio	pvalue	p.adjust	qvalue	geneID	Count	ONT
GO:0007049	cell cycle	151/401	1716/17910	2.92552e-53	1.43e-49	1.23827e-49	MYBL2/UBE2C/TPX2/CDC20/TOP2A/ANLN/KIF2C/MELK/CENPA/HJURP/KIF4A/RRM2/DLGAP5/FOXM1/NEK2/CEP55/AURKB/CDCA5/KIF18B/CDKN3/CDC6/TRIP13/CCNA2/NCAPH/KIFC1/NCAPG/PRR11/CCNB2/TTK/PBK/CDCA8/MKI67/CDK1/CCNB1/BUB1/CDC45/NDC80/PLK1/KIF23/CENPF/SPAG5/EXO1/BUB1B/MCM10/AURKA/PIMREG/FAM83D/SKA1/KIF11/GTSE1/ASPM/KIF20A/PRC1/ZWINT/CENPW/ESPL1/RAD54L/HMMR/NUSAP1/MAD2L1/SKA3/CCNE1/IQGAP3/CDT1/UHRF1/ORC1/SPC25/KIF14/CD…	151	BP
GO:0000278	mitotic cell cycle	113/401	934/17910	2.7525e-52	6.72712e-49	5.82516e-49	MYBL2/UBE2C/TPX2/CDC20/ANLN/KIF2C/MELK/CENPA/KIF4A/RRM2/DLGAP5/FOXM1/NEK2/CEP55/AURKB/CDCA5/KIF18B/CDKN3/CDC6/TRIP13/CCNA2/NCAPH/KIFC1/NCAPG/CCNB2/TTK/PBK/CDCA8/MKI67/CDK1/CCNB1/BUB1/CDC45/NDC80/PLK1/KIF23/CENPF/SPAG5/BUB1B/MCM10/AURKA/SKA1/KIF11/GTSE1/KIF20A/PRC1/ZWINT/CENPW/ESPL1/HMMR/NUSAP1/MAD2L1/SKA3/CCNE1/IQGAP3/CDT1/ORC1/SPC25/KIF14/SAPCD2/PKMYT1/RACGAP1/DSCC1/MCM2/MCM4/SGO1/CDC25C/KIF15/D…	113	BP
GO:1903047	mitotic cell cycle process	106/401	816/17910	7.56481e-52	1.23256e-48	1.0673e-48	MYBL2/UBE2C/TPX2/CDC20/ANLN/KIF2C/MELK/CENPA/KIF4A/RRM2/DLGAP5/FOXM1/NEK2/CEP55/AURKB/CDCA5/CDKN3/CDC6/TRIP13/CCNA2/NCAPH/KIFC1/NCAPG/CCNB2/TTK/CDCA8/MKI67/CDK1/CCNB1/BUB1/CDC45/NDC80/PLK1/KIF23/CENPF/SPAG5/BUB1B/MCM10/AURKA/KIF11/GTSE1/KIF20A/PRC1/ZWINT/ESPL1/HMMR/NUSAP1/MAD2L1/CCNE1/IQGAP3/CDT1/ORC1/SPC25/KIF14/SAPCD2/PKMYT1/RACGAP1/DSCC1/MCM2/MCM4/SGO1/CDC25C/DTL/E2F1/CLSPN/CENPE/CHEK1/UBE2S/E…	106	BP
GO:0051301	cell division	88/401	575/17910	1.54925e-48	1.89318e-45	1.63935e-45	UBE2C/TPX2/CDC20/BIRC5/TOP2A/ANLN/KIF2C/CENPA/KIF4A/NEK2/CEP55/AURKB/CDCA5/KIF18B/CDC6/CCNA2/NCAPH/KIFC1/NUF2/NCAPG/CCNB2/CDCA8/CDK1/CCNB1/BUB1/NDC80/PLK1/KIF23/CENPF/SPAG5/BUB1B/AURKA/PIMREG/FAM83D/SKA1/KIF11/ASPM/KIF20A/PRC1/ZWINT/CENPW/ESPL1/NUSAP1/MAD2L1/SKA3/CCNE1/CDT1/SPC25/KIF14/CDCA3/SAPCD2/CDCA2/RACGAP1/SPC24/SGO1/CDC25C/CENPE/UBE2S/OIP5/ECT2/PTTG1/CDC25A/NCAPG2/ORC6/TACC3/E2F8/ERCC6L/ST…	88	BP
GO:0022402	cell cycle process	125/401	1280/17910	7.62263e-48	7.45188e-45	6.45276e-45	MYBL2/UBE2C/TPX2/CDC20/TOP2A/ANLN/KIF2C/MELK/CENPA/KIF4A/RRM2/DLGAP5/FOXM1/NEK2/CEP55/AURKB/CDCA5/CDKN3/CDC6/TRIP13/CCNA2/NCAPH/KIFC1/NCAPG/CCNB2/TTK/CDCA8/MKI67/CDK1/CCNB1/BUB1/CDC45/NDC80/PLK1/KIF23/CENPF/SPAG5/BUB1B/MCM10/AURKA/FAM83D/KIF11/GTSE1/ASPM/KIF20A/PRC1/ZWINT/ESPL1/HMMR/NUSAP1/MAD2L1/CCNE1/IQGAP3/CDT1/ORC1/SPC25/KIF14/SAPCD2/PKMYT1/RACGAP1/PCLAF/DSCC1/MCM2/MCM4/SGO1/CDC25C/DTL/E2F1/C…	125	BP
GO:0007059	chromosome segregation	59/401	275/17910	6.48252e-41	5.28109e-38	4.57302e-38	CDC20/BIRC5/TOP2A/KIF2C/HJURP/KIF4A/DLGAP5/NEK2/AURKB/CDCA5/CDC6/TRIP13/NCAPH/KIFC1/NUF2/NCAPG/TTK/CDCA8/MKI67/CCNB1/BUB1/NDC80/PLK1/KIF23/CENPF/SPAG5/BUB1B/FAM83D/SKA1/PRC1/ZWINT/CENPW/ESPL1/NUSAP1/MAD2L1/SKA3/CDT1/SPC25/KIF14/CDCA2/RACGAP1/DSCC1/SGO1/CENPE/ECT2/BRCA1/TACC3/FEN1/SGO2/KNL1/PSRC1/HASPIN/KIF18A/CENPN/BRIP1/INCENP/NCAPD2/FBXO5/RMI2	59	BP
GO:0140014	mitotic nuclear division	53/401	237/17910	9.31071e-38	6.50154e-35	5.62983e-35	MYBL2/UBE2C/TPX2/CDC20/ANLN/KIF2C/KIF4A/DLGAP5/NEK2/AURKB/CDCA5/CDC6/TRIP13/NCAPH/KIFC1/NCAPG/TTK/CDCA8/MKI67/CCNB1/NDC80/PLK1/KIF23/CENPF/SPAG5/BUB1B/AURKA/KIF11/PRC1/ZWINT/ESPL1/NUSAP1/MAD2L1/CDT1/KIF14/PKMYT1/RACGAP1/DSCC1/SGO1/CDC25C/CENPE/CHEK1/UBE2S/TACC3/PSRC1/HASPIN/KIF18A/KIF20B/INCENP/NCAPD2/SPHK1/FBXO5/KNTC1	53	BP
GO:0000819	sister chromatid segregation	43/401	157/17910	9.13411e-35	5.58094e-32	4.83267e-32	CDC20/KIF2C/KIF4A/DLGAP5/NEK2/AURKB/CDCA5/CDC6/TRIP13/NCAPH/KIFC1/NCAPG/TTK/CDCA8/CCNB1/BUB1/NDC80/PLK1/KIF23/CENPF/SPAG5/BUB1B/PRC1/ZWINT/ESPL1/NUSAP1/MAD2L1/CDT1/KIF14/RACGAP1/DSCC1/SGO1/CENPE/TACC3/FEN1/SGO2/PSRC1/HASPIN/KIF18A/INCENP/NCAPD2/FBXO5/RMI2	43	BP
GO:0098687	chromosomal region	57/411	337/18675	5.89495e-34	3.0359e-31	2.45106e-31	BIRC5/KIF2C/CENPA/HJURP/NEK2/AURKB/CDCA5/NUF2/NCAPG/TTK/CDCA8/CDK1/CCNB1/BUB1/NDC80/PLK1/CENPF/SPAG5/BUB1B/SKA1/ZWINT/CENPW/MAD2L1/SKA3/CDT1/ORC1/SPC25/DSCC1/MCM2/MCM4/SPC24/SGO1/CENPU/CENPE/CHEK1/RECQL4/OIP5/RAD51/CENPI/MCM6/CENPM/ERCC6L/FEN1/EZH2/SGO2/KNL1/CENPK/MCM7/KIF18A/CENPN/HELLS/INCENP/CENPH/BLM/KNTC1/ESCO2/PIF1	57	CC
GO:0000280	nuclear division	58/401	357/17910	3.31836e-33	1.80224e-30	1.5606e-30	MYBL2/UBE2C/TPX2/CDC20/TOP2A/ANLN/KIF2C/KIF4A/DLGAP5/NEK2/AURKB/CDCA5/CDC6/TRIP13/NCAPH/KIFC1/NCAPG/TTK/CDCA8/MKI67/CCNB1/NDC80/PLK1/KIF23/CENPF/SPAG5/BUB1B/AURKA/KIF11/ASPM/PRC1/ZWINT/ESPL1/NUSAP1/MAD2L1/CDT1/KIF14/PKMYT1/RACGAP1/DSCC1/SGO1/CDC25C/CENPE/CHEK1/UBE2S/TACC3/SGO2/CKS2/PSRC1/HASPIN/KIF18A/BRIP1/KIF20B/INCENP/NCAPD2/SPHK1/FBXO5/KNTC1	58	BP
GO:0000070	mitotic sister chromatid segregation	39/401	132/17910	5.11501e-33	2.50022e-30	2.16499e-30	CDC20/KIF2C/KIF4A/DLGAP5/NEK2/AURKB/CDCA5/CDC6/TRIP13/NCAPH/KIFC1/NCAPG/TTK/CDCA8/CCNB1/NDC80/PLK1/KIF23/CENPF/SPAG5/BUB1B/PRC1/ZWINT/ESPL1/NUSAP1/MAD2L1/CDT1/KIF14/RACGAP1/DSCC1/SGO1/CENPE/TACC3/PSRC1/HASPIN/KIF18A/INCENP/NCAPD2/FBXO5	39	BP
GO:0000793	condensed chromosome	45/411	199/18675	1.1997e-32	3.08923e-30	2.49411e-30	BIRC5/TOP2A/KIF2C/CENPA/HJURP/NEK2/AURKB/CDCA5/NCAPH/NCAPG/MKI67/CCNB1/BUB1/NDC80/PLK1/CENPF/SPAG5/BUB1B/SKA1/ZWINT/CENPW/MAD2L1/SKA3/CDT1/SPC25/SPC24/SGO1/CENPU/CENPE/CHEK1/RAD51/NCAPG2/BRCA1/CENPM/ERCC6L/SGO2/KNL1/CENPK/CENPN/INCENP/NCAPD2/CENPH/BLM/HMGB2/KNTC1	45	CC
GO:0044770	cell cycle phase transition	73/401	609/17910	8.5871e-33	3.81579e-30	3.30418e-30	UBE2C/TPX2/CDC20/ANLN/MELK/RRM2/DLGAP5/FOXM1/NEK2/AURKB/CDCA5/CDKN3/CDC6/TRIP13/CCNA2/CCNB2/TTK/CDK1/CCNB1/CDC45/NDC80/PLK1/CENPF/BUB1B/MCM10/AURKA/FAM83D/GTSE1/ESPL1/HMMR/MAD2L1/CCNE1/IQGAP3/CDT1/ORC1/KIF14/PKMYT1/MCM2/MCM4/CDC25C/DTL/E2F1/CLSPN/CENPE/CHEK1/UBE2S/PLK4/TYMS/CDC25A/BRCA1/ORC6/TACC3/E2F8/MCM6/EIF4EBP1/EZH2/CKS2/POLE2/TICRR/CDC7/CKS1B/MCM7/TIMELESS/E2F7/CDKN2A/DBF4/BLM/PRIM1/FBXO5/S…	73	BP
GO:0048285	organelle fission	60/401	395/17910	1.16694e-32	4.75332e-30	4.11601e-30	MYBL2/UBE2C/TPX2/CDC20/TOP2A/ANLN/KIF2C/KIF4A/DLGAP5/NEK2/AURKB/CDCA5/CDC6/TRIP13/NCAPH/KIFC1/NCAPG/TTK/CDCA8/MKI67/CCNB1/NDC80/PLK1/KIF23/CENPF/SPAG5/BUB1B/AURKA/KIF11/ASPM/PRC1/ZWINT/ESPL1/NUSAP1/MAD2L1/CDT1/KIF14/PKMYT1/RACGAP1/DSCC1/SGO1/CDC25C/CENPE/CHEK1/MTFR2/UBE2S/TACC3/SGO2/CKS2/PSRC1/HASPIN/KIF18A/BRIP1/KIF20B/INCENP/NCAPD2/SPHK1/FBXO5/KNTC1/LRRK2	60	BP
GO:0098813	nuclear chromosome segregation	47/401	220/17910	1.44613e-32	5.43746e-30	4.70843e-30	CDC20/KIF2C/KIF4A/DLGAP5/NEK2/AURKB/CDCA5/CDC6/TRIP13/NCAPH/KIFC1/NCAPG/TTK/CDCA8/CCNB1/BUB1/NDC80/PLK1/KIF23/CENPF/SPAG5/BUB1B/FAM83D/PRC1/ZWINT/ESPL1/NUSAP1/MAD2L1/CDT1/KIF14/RACGAP1/DSCC1/SGO1/CENPE/ECT2/TACC3/FEN1/SGO2/KNL1/PSRC1/HASPIN/KIF18A/BRIP1/INCENP/NCAPD2/FBXO5/RMI2	47	BP
GO:0005694	chromosome	90/411	982/18675	6.4066e-32	1.0998e-29	8.87932e-30	MYBL2/BIRC5/TOP2A/KIF2C/CENPA/HJURP/KIF4A/NEK2/AURKB/CDCA5/NCAPH/NUF2/NCAPG/TTK/CDCA8/MKI67/CDK1/CCNB1/BUB1/NDC80/PLK1/CENPF/SPAG5/BUB1B/SKA1/ZWINT/CENPW/NUSAP1/MAD2L1/SKA3/RAD51AP1/CDT1/UHRF1/ORC1/SPC25/ASF1B/CDCA2/DSCC1/MCM2/MCM4/SPC24/SGO1/CENPU/DTL/E2F1/CENPE/CHEK1/RECQL4/AUNIP/OIP5/RAD51/CENPI/PLK4/HMGA1/EME1/XRCC2/NCAPG2/BRCA1/ORC6/MCM6/RFC4/CENPM/ERCC6L/FEN1/EZH2/SGO2/POLE2/POLQ/KNL1/CENPK…	90	CC
GO:0000775	chromosome, centromeric region	43/411	185/18675	9.13981e-32	1.17675e-29	9.50059e-30	BIRC5/KIF2C/CENPA/HJURP/NEK2/AURKB/CDCA5/NUF2/NCAPG/TTK/CDCA8/CCNB1/BUB1/NDC80/PLK1/CENPF/SPAG5/BUB1B/SKA1/ZWINT/CENPW/MAD2L1/SKA3/CDT1/SPC25/DSCC1/SPC24/SGO1/CENPU/CENPE/CENPI/CENPM/ERCC6L/SGO2/KNL1/CENPK/KIF18A/CENPN/HELLS/INCENP/CENPH/KNTC1/ESCO2	43	CC
GO:0044772	mitotic cell cycle phase transition	69/401	565/17910	1.77242e-31	6.18827e-29	5.35857e-29	UBE2C/TPX2/CDC20/ANLN/MELK/RRM2/DLGAP5/FOXM1/NEK2/AURKB/CDCA5/CDKN3/CDC6/TRIP13/CCNA2/CCNB2/TTK/CDK1/CCNB1/CDC45/NDC80/PLK1/CENPF/BUB1B/MCM10/AURKA/GTSE1/ESPL1/HMMR/MAD2L1/CCNE1/IQGAP3/CDT1/ORC1/KIF14/PKMYT1/MCM2/MCM4/CDC25C/DTL/E2F1/CLSPN/CENPE/UBE2S/PLK4/TYMS/CDC25A/BRCA1/ORC6/TACC3/E2F8/MCM6/EIF4EBP1/EZH2/CKS2/POLE2/TICRR/CDC7/CKS1B/MCM7/E2F7/CDKN2A/DBF4/BLM/PRIM1/FBXO5/SKP2/KNTC1/MUC1	69	BP
GO:0000776	kinetochore	37/411	131/18675	8.15325e-31	8.39785e-29	6.78007e-29	BIRC5/KIF2C/CENPA/HJURP/NEK2/AURKB/NUF2/TTK/CCNB1/BUB1/NDC80/PLK1/CENPF/SPAG5/BUB1B/SKA1/ZWINT/CENPW/MAD2L1/SKA3/CDT1/SPC25/SPC24/SGO1/CENPU/CENPE/CENPI/CENPM/ERCC6L/SGO2/KNL1/CENPK/KIF18A/CENPN/INCENP/CENPH/KNTC1	37	CC
GO:0051276	chromosome organization	95/401	1097/17910	2.5788e-31	8.40346e-29	7.27675e-29	CDC20/TOP2A/KIF2C/CENPA/HJURP/KIF4A/DLGAP5/NEK2/AURKB/CDCA5/CDC6/TRIP13/CCNA2/NCAPH/KIFC1/NCAPG/TTK/CDCA8/MKI67/CDK1/CCNB1/BUB1/CDC45/NDC80/PLK1/KIF23/CENPF/SPAG5/EXO1/BUB1B/AURKA/PRC1/ZWINT/CENPW/ESPL1/RAD54L/NUSAP1/MAD2L1/CCNE1/GINS1/CDT1/UHRF1/KIF14/ASF1B/RACGAP1/DSCC1/MCM2/MCM4/SGO1/CENPU/CENPE/GINS2/CHEK1/RECQL4/OIP5/ATAD2/RAD51/CENPI/HMGA1/PTTG1/NCAPG2/BRCA1/TACC3/MCM6/RFC4/CENPM/FEN1/EZH2/…	95	BP
GO:0000779	condensed chromosome, centromeric region	34/411	110/18675	7.09191e-30	6.08722e-28	4.91457e-28	BIRC5/KIF2C/CENPA/HJURP/NEK2/AURKB/NCAPG/CCNB1/BUB1/NDC80/PLK1/CENPF/SPAG5/BUB1B/SKA1/ZWINT/CENPW/MAD2L1/SKA3/CDT1/SPC25/SPC24/SGO1/CENPU/CENPE/CENPM/ERCC6L/SGO2/KNL1/CENPK/CENPN/INCENP/CENPH/KNTC1	34	CC
GO:0044427	chromosomal part	80/411	855/18675	7.20957e-29	5.30418e-27	4.28237e-27	MYBL2/BIRC5/KIF2C/CENPA/HJURP/NEK2/AURKB/CDCA5/NCAPH/NUF2/NCAPG/TTK/CDCA8/CDK1/CCNB1/BUB1/NDC80/PLK1/CENPF/SPAG5/BUB1B/SKA1/ZWINT/CENPW/MAD2L1/SKA3/RAD51AP1/CDT1/UHRF1/ORC1/SPC25/ASF1B/DSCC1/MCM2/MCM4/SPC24/SGO1/CENPU/E2F1/CENPE/CHEK1/RECQL4/AUNIP/OIP5/RAD51/CENPI/HMGA1/EME1/XRCC2/NCAPG2/BRCA1/ORC6/MCM6/RFC4/CENPM/ERCC6L/FEN1/EZH2/SGO2/POLE2/KNL1/CENPK/PARPBP/MCM7/TIMELESS/KIF18A/CENPN/HELLS/INCE…	80	CC
GO:0000777	condensed chromosome kinetochore	32/411	100/18675	1.00653e-28	6.47955e-27	5.23132e-27	BIRC5/KIF2C/CENPA/HJURP/NEK2/CCNB1/BUB1/NDC80/PLK1/CENPF/SPAG5/BUB1B/SKA1/ZWINT/CENPW/MAD2L1/SKA3/CDT1/SPC25/SPC24/SGO1/CENPU/CENPE/CENPM/ERCC6L/SGO2/KNL1/CENPK/CENPN/INCENP/CENPH/KNTC1	32	CC
GO:0006260	DNA replication	44/401	259/17910	3.86669e-26	1.18127e-23	1.02289e-23	RRM2/CDC6/CCNA2/CDK1/CDC45/EXO1/MCM10/CCNE1/GINS1/CDT1/ORC1/PCLAF/DSCC1/MCM2/MCM4/DTL/CLSPN/GINS2/CHEK1/RECQL4/RAD51/HMGA1/BRCA1/ORC6/E2F8/MCM6/RFC4/FEN1/POLE2/GINS4/TICRR/CDC7/MCM7/TIMELESS/BRIP1/E2F7/DBF4/BLM/CHAF1B/PRIM1/FBXO5/RMI2/ESCO2/NFIX	44	BP
GO:0051726	regulation of cell cycle	88/401	1149/17910	4.55152e-25	1.3087e-22	1.13323e-22	MYBL2/UBE2C/TPX2/CDC20/ANLN/RRM2/DLGAP5/FOXM1/NEK2/AURKB/CDCA5/CDKN3/CDC6/TRIP13/PRR11/CCNB2/TTK/MKI67/CDK1/CCNB1/BUB1/CDC45/NDC80/PLK1/KIF23/CENPF/SPAG5/BUB1B/AURKA/FAM83D/KIF11/GTSE1/ASPM/KIF20A/PRC1/ZWINT/ESPL1/HMMR/NUSAP1/MAD2L1/CCNE1/CDT1/KIF14/PKMYT1/RACGAP1/PCLAF/CDC25C/DTL/E2F1/CLSPN/CENPE/CHEK1/ECT2/RAD51/PLK4/CDC25A/BRCA1/FOSL1/TACC3/E2F8/DDIAS/FEN1/STIL/EIF4EBP1/EZH2/CKS2/POC1A/TICRR/C…	88	BP
GO:0005819	spindle	46/411	326/18675	4.97893e-24	2.84906e-22	2.30021e-22	TPX2/CDC20/KIF4A/DLGAP5/NEK2/AURKB/KIF18B/CDC6/TTK/CDK1/CCNB1/PLK1/KIF23/CENPF/SPAG5/CKAP2L/BUB1B/AURKA/FAM83D/SKA1/KIF11/ASPM/KIF20A/PRC1/MAD2L1/SKA3/KIF14/RACGAP1/SGO1/KIF15/CENPE/AUNIP/SHCBP1/ECT2/TACC3/POC1A/CDC7/PSRC1/HASPIN/WDR62/KIF18A/KIF20B/INCENP/FBXO5/KNTC1/SNCG	46	CC
GO:0010564	regulation of cell cycle process	69/401	764/17910	1.40009e-23	3.80201e-21	3.29225e-21	UBE2C/TPX2/CDC20/ANLN/RRM2/DLGAP5/FOXM1/NEK2/AURKB/CDCA5/CDC6/TRIP13/TTK/MKI67/CDK1/CCNB1/BUB1/NDC80/PLK1/KIF23/CENPF/SPAG5/BUB1B/AURKA/FAM83D/KIF11/GTSE1/KIF20A/PRC1/ESPL1/HMMR/NUSAP1/MAD2L1/CCNE1/CDT1/KIF14/PKMYT1/RACGAP1/CDC25C/DTL/E2F1/CLSPN/CENPE/CHEK1/ECT2/RAD51/PLK4/BRCA1/TACC3/E2F8/FEN1/STIL/EZH2/POC1A/TICRR/CDC7/PSRC1/E2F7/KIF20B/INCENP/CDKN2A/BLM/SPHK1/FBXO5/KNTC1/RMI2/CCNF/MUC1/SUSD2	69	BP
GO:0051983	regulation of chromosome segregation	27/401	93/17910	5.98337e-23	1.5393e-20	1.33292e-20	CDC20/KIF2C/DLGAP5/NEK2/AURKB/CDCA5/CDC6/TRIP13/TTK/MKI67/CCNB1/BUB1/NDC80/PLK1/CENPF/SPAG5/BUB1B/ESPL1/MAD2L1/CDT1/RACGAP1/CENPE/ECT2/TACC3/FEN1/FBXO5/RMI2	27	BP
GO:0007088	regulation of mitotic nuclear division	31/401	150/17910	2.47098e-21	6.03909e-19	5.22938e-19	UBE2C/CDC20/ANLN/DLGAP5/NEK2/AURKB/CDCA5/CDC6/TRIP13/TTK/MKI67/CCNB1/NDC80/PLK1/CENPF/BUB1B/AURKA/KIF11/ESPL1/NUSAP1/MAD2L1/CDT1/PKMYT1/CDC25C/CENPE/CHEK1/TACC3/KIF20B/SPHK1/FBXO5/KNTC1	31	BP
GO:0006259	DNA metabolic process	73/401	963/17910	1.89207e-20	4.40403e-18	3.81355e-18	TOP2A/RRM2/FOXM1/NEK2/AURKB/CDCA5/CDC6/TRIP13/CCNA2/CDK1/CDC45/CENPF/EXO1/MCM10/TK1/UBE2T/RAD54L/KPNA2/CCNE1/GINS1/RAD51AP1/CDT1/UHRF1/ORC1/NEIL3/PCLAF/DSCC1/MCM2/MCM4/DTL/CLSPN/GINS2/CHEK1/RECQL4/AUNIP/RAD51/TYMS/HMGA1/PTTG1/EME1/XRCC2/BRCA1/ORC6/FANCI/E2F8/MCM6/RFC4/FEN1/EZH2/POLE2/POLQ/GINS4/TICRR/PARPBP/CDC7/MCM7/GREM1/TIMELESS/BRIP1/E2F7/HELLS/DBF4/BLM/CHAF1B/PRIM1/HMGB2/SPHK1/FBXO5/RMI2/ESC…	73	BP
GO:1902850	microtubule cytoskeleton organization involved in mitosis	27/401	116/17910	3.61878e-20	8.04027e-18	6.96226e-18	MYBL2/TPX2/CDC20/CENPA/KIF4A/AURKB/KIFC1/TTK/CCNB1/NDC80/PLK1/KIF23/KIF11/PRC1/ESPL1/NUSAP1/MAD2L1/SPC25/SAPCD2/RACGAP1/CENPE/TACC3/STIL/STMN1/POC1A/PSRC1/WDR62	27	BP
GO:0071103	DNA conformation change	39/401	279/17910	4.06819e-20	8.64578e-18	7.48658e-18	TOP2A/CENPA/HJURP/CDCA5/NCAPH/NCAPG/CDK1/CCNB1/CDC45/CENPW/RAD54L/NUSAP1/GINS1/ASF1B/MCM2/MCM4/CENPU/GINS2/RECQL4/OIP5/RAD51/CENPI/HMGA1/NCAPG2/MCM6/CENPM/GINS4/KNL1/CENPK/MCM7/CENPN/BRIP1/HELLS/CDKN2A/NCAPD2/CENPH/BLM/CHAF1B/HMGB2	39	BP
GO:0015630	microtubule cytoskeleton	76/411	1102/18675	2.91465e-19	1.50105e-17	1.21188e-17	TPX2/CDC20/BIRC5/TOP2A/KIF2C/KIF4A/DLGAP5/NEK2/CEP55/AURKB/KIF18B/CDC6/KIFC1/CCNB2/TTK/CDCA8/CDK1/CCNB1/CDC45/NDC80/PLK1/KIF23/CENPF/SPAG5/CKAP2L/BUB1B/AURKA/FAM83D/SKA1/KIF11/GTSE1/ASPM/KIF20A/PRC1/ESPL1/HMMR/MAD2L1/SKA3/KIF14/RACGAP1/PCLAF/MCM2/SGO1/KIF15/CENPU/DTL/E2F1/CENPE/CHEK1/AUNIP/SHCBP1/ECT2/RAD51/PLK4/XRCC2/BRCA1/TACC3/STIL/STMN1/POC1A/CDC7/PSRC1/HASPIN/WDR62/KIF18A/SLC16A1/KIF20B/INCE…	76	CC
GO:0000226	microtubule cytoskeleton organization	49/401	460/17910	7.54223e-20	1.5361e-17	1.33015e-17	MYBL2/TPX2/CDC20/KIF2C/CENPA/KIF4A/NEK2/AURKB/KIF18B/KIFC1/TTK/CDK1/CCNB1/NDC80/PLK1/KIF23/SPAG5/AURKA/SKA1/KIF11/ASPM/KIF20A/PRC1/ESPL1/NUSAP1/MAD2L1/SKA3/SPC25/SAPCD2/RACGAP1/PCLAF/SGO1/CENPE/CHEK1/AUNIP/PLK4/XRCC2/BRCA1/TACC3/STIL/STMN1/POC1A/PSRC1/WDR62/KIF18A/SLC16A1/FBXO5/CCNF/TPPP3	49	BP
GO:0007017	microtubule-based process	57/401	627/17910	1.18111e-19	2.30931e-17	1.99968e-17	MYBL2/TPX2/CDC20/KIF2C/CENPA/KIF4A/DLGAP5/NEK2/AURKB/KIF18B/KIFC1/TTK/CDK1/CCNB1/NDC80/PLK1/KIF23/SPAG5/AURKA/SKA1/KIF11/GTSE1/ASPM/KIF20A/PRC1/ESPL1/NUSAP1/MAD2L1/SKA3/SPC25/SAPCD2/UCHL1/RACGAP1/PCLAF/SGO1/KIF15/CENPE/CHEK1/AUNIP/PLK4/XRCC2/BRCA1/TACC3/STIL/STMN1/KIF1A/POC1A/PSRC1/WDR62/KIF18A/SLC16A1/TUBB2B/KIF3C/FBXO5/CCNF/TPPP3/CFAP221	57	BP
GO:0051783	regulation of nuclear division	31/401	172/17910	1.7332e-19	3.25842e-17	2.82154e-17	UBE2C/CDC20/ANLN/DLGAP5/NEK2/AURKB/CDCA5/CDC6/TRIP13/TTK/MKI67/CCNB1/NDC80/PLK1/CENPF/BUB1B/AURKA/KIF11/ESPL1/NUSAP1/MAD2L1/CDT1/PKMYT1/CDC25C/CENPE/CHEK1/TACC3/KIF20B/SPHK1/FBXO5/KNTC1	31	BP
GO:0007051	spindle organization	29/401	147/17910	1.94062e-19	3.51324e-17	3.04219e-17	MYBL2/TPX2/CDC20/KIF4A/NEK2/AURKB/KIFC1/TTK/CCNB1/NDC80/PLK1/KIF23/SPAG5/AURKA/KIF11/ASPM/PRC1/ESPL1/SPC25/RACGAP1/CENPE/AUNIP/TACC3/STIL/STMN1/POC1A/PSRC1/WDR62/FBXO5	29	BP
GO:0044843	cell cycle G1/S phase transition	38/401	288/17910	9.55974e-19	1.66886e-16	1.4451e-16	RRM2/CDKN3/CDC6/CCNA2/CDK1/CCNB1/CDC45/MCM10/AURKA/FAM83D/GTSE1/CCNE1/IQGAP3/CDT1/ORC1/KIF14/MCM2/MCM4/CDC25C/E2F1/TYMS/CDC25A/ORC6/E2F8/MCM6/EIF4EBP1/EZH2/POLE2/CDC7/MCM7/E2F7/CDKN2A/DBF4/PRIM1/FBXO5/SKP2/MUC1/SUSD2	38	BP
GO:0033045	regulation of sister chromatid segregation	21/401	70/17910	1.88206e-18	3.17225e-16	2.74692e-16	CDC20/DLGAP5/AURKB/CDCA5/CDC6/TRIP13/TTK/CCNB1/BUB1/NDC80/PLK1/CENPF/BUB1B/ESPL1/MAD2L1/CDT1/CENPE/TACC3/FEN1/FBXO5/RMI2	21	BP
GO:0007346	regulation of mitotic cell cycle	55/401	622/17910	1.95393e-18	3.18361e-16	2.75676e-16	UBE2C/TPX2/CDC20/ANLN/DLGAP5/NEK2/AURKB/CDCA5/CDC6/TRIP13/TTK/MKI67/CDK1/CCNB1/BUB1/NDC80/PLK1/CENPF/BUB1B/AURKA/KIF11/GTSE1/ZWINT/ESPL1/HMMR/NUSAP1/MAD2L1/CCNE1/CDT1/KIF14/PKMYT1/CDC25C/DTL/E2F1/CLSPN/CENPE/CHEK1/PLK4/BRCA1/TACC3/E2F8/EIF4EBP1/EZH2/TICRR/CDC7/PSRC1/E2F7/KIF20B/INCENP/CDKN2A/BLM/SPHK1/FBXO5/KNTC1/MUC1	55	BP
GO:0045787	positive regulation of cell cycle	42/401	373/17910	5.11977e-18	8.07272e-16	6.99035e-16	UBE2C/DLGAP5/AURKB/CDCA5/CDC6/CDK1/CCNB1/NDC80/KIF23/SPAG5/AURKA/FAM83D/GTSE1/ESPL1/NUSAP1/MAD2L1/CCNE1/CDT1/KIF14/RACGAP1/CDC25C/DTL/E2F1/CHEK1/ECT2/PLK4/BRCA1/FOSL1/E2F8/FEN1/EIF4EBP1/EZH2/CKS2/POC1A/CDC7/PSRC1/CKS1B/E2F7/KIF20B/SPHK1/FBXO5/MUC1	42	BP
GO:0006996	organelle organization	148/401	3372/17910	6.69239e-18	1.02226e-15	8.85201e-16	MYBL2/UBE2C/TPX2/CDC20/TOP2A/ANLN/KIF2C/CENPA/HJURP/KIF4A/DLGAP5/NEK2/AURKB/CDCA5/KIF18B/CDC6/TRIP13/CCNA2/NCAPH/KIFC1/NCAPG/CCNB2/TTK/CDCA8/MKI67/CDK1/CCNB1/BUB1/CDC45/NDC80/PLK1/KIF23/CENPF/SPAG5/EXO1/BUB1B/AURKA/SKA1/KIF11/ASPM/KIF20A/PRC1/ZWINT/CENPW/ESPL1/RAD54L/NUSAP1/MAD2L1/SKA3/CCNE1/GINS1/CDT1/UHRF1/SPC25/KIF14/ASF1B/SAPCD2/PKMYT1/RACGAP1/PCLAF/DSCC1/MCM2/MCM4/SGO1/CDC25C/CENPU/PFN2/E2F1…	148	BP
GO:0000075	cell cycle checkpoint	31/401	197/17910	1.02996e-17	1.52559e-15	1.32104e-15	CDC20/AURKB/CDC6/TRIP13/TTK/CDK1/CCNB1/BUB1/CDC45/NDC80/PLK1/CENPF/BUB1B/AURKA/GTSE1/ZWINT/MAD2L1/CDT1/CDC25C/DTL/E2F1/CLSPN/CHEK1/BRCA1/E2F8/TICRR/BRIP1/E2F7/BLM/KNTC1/MUC1	31	BP
GO:0090068	positive regulation of cell cycle process	36/401	283/17910	2.71901e-17	3.90897e-15	3.38487e-15	UBE2C/DLGAP5/AURKB/CDCA5/CDC6/CDK1/CCNB1/NDC80/KIF23/SPAG5/AURKA/FAM83D/GTSE1/ESPL1/NUSAP1/MAD2L1/CCNE1/CDT1/KIF14/RACGAP1/CDC25C/DTL/E2F1/ECT2/PLK4/BRCA1/E2F8/FEN1/EZH2/POC1A/CDC7/E2F7/KIF20B/SPHK1/FBXO5/MUC1	36	BP
GO:0000082	G1/S transition of mitotic cell cycle	35/401	269/17910	3.73742e-17	5.21958e-15	4.51975e-15	RRM2/CDKN3/CDC6/CDK1/CCNB1/CDC45/MCM10/AURKA/GTSE1/CCNE1/IQGAP3/CDT1/ORC1/KIF14/MCM2/MCM4/CDC25C/E2F1/TYMS/CDC25A/ORC6/E2F8/MCM6/EIF4EBP1/EZH2/POLE2/CDC7/MCM7/E2F7/CDKN2A/DBF4/PRIM1/FBXO5/SKP2/MUC1	35	BP
GO:0007091	metaphase/anaphase transition of mitotic cell cycle	17/401	47/17910	9.46175e-17	1.24997e-14	1.08238e-14	CDC20/DLGAP5/AURKB/CDC6/TRIP13/TTK/CCNB1/NDC80/PLK1/CENPF/BUB1B/ESPL1/MAD2L1/CDT1/CENPE/TACC3/FBXO5	17	BP
GO:0010965	regulation of mitotic sister chromatid separation	17/401	47/17910	9.46175e-17	1.24997e-14	1.08238e-14	CDC20/DLGAP5/AURKB/CDC6/TRIP13/TTK/CCNB1/NDC80/PLK1/CENPF/BUB1B/ESPL1/MAD2L1/CDT1/CENPE/TACC3/FBXO5	17	BP
GO:1901987	regulation of cell cycle phase transition	45/401	464/17910	1.00871e-16	1.29752e-14	1.12355e-14	UBE2C/TPX2/CDC20/ANLN/DLGAP5/NEK2/AURKB/CDCA5/CDC6/TRIP13/TTK/CDK1/CCNB1/NDC80/PLK1/CENPF/BUB1B/AURKA/FAM83D/GTSE1/ESPL1/HMMR/MAD2L1/CCNE1/CDT1/KIF14/CDC25C/DTL/E2F1/CLSPN/CENPE/CHEK1/PLK4/BRCA1/E2F8/EZH2/TICRR/CDC7/E2F7/CDKN2A/BLM/FBXO5/KNTC1/MUC1/SUSD2	45	BP
GO:0007052	mitotic spindle organization	22/401	95/17910	1.30469e-16	1.63522e-14	1.41597e-14	MYBL2/TPX2/CDC20/KIF4A/AURKB/KIFC1/TTK/CCNB1/NDC80/PLK1/KIF23/KIF11/PRC1/SPC25/RACGAP1/CENPE/TACC3/STIL/STMN1/POC1A/PSRC1/WDR62	22	BP
GO:0044430	cytoskeletal part	86/411	1543/18675	4.94446e-16	2.31491e-14	1.86896e-14	TPX2/CDC20/BIRC5/TOP2A/ANLN/KIF2C/KIF4A/DLGAP5/NEK2/CEP55/AURKB/KIF18B/CDC6/KIFC1/CCNB2/TTK/CDCA8/CDK1/CCNB1/CDC45/NDC80/PLK1/KIF23/CENPF/SPAG5/CKAP2L/BUB1B/AURKA/FAM83D/SKA1/KIF11/SLC2A1/GTSE1/ASPM/KIF20A/PRC1/TNNT1/ESPL1/HMMR/MAD2L1/SKA3/KIF14/RACGAP1/PCLAF/SGO1/KIF15/CENPU/DTL/E2F1/CENPE/CHEK1/AUNIP/SHCBP1/ECT2/RAD51/PLK4/LMNB1/XRCC2/BRCA1/TACC3/DSP/STIL/STMN1/POC1A/CDC7/PSRC1/KRT6A/HASPIN/WDR…	86	CC
GO:0044784	metaphase/anaphase transition of cell cycle	17/401	49/17910	2.15337e-16	2.56724e-14	2.22303e-14	CDC20/DLGAP5/AURKB/CDC6/TRIP13/TTK/CCNB1/NDC80/PLK1/CENPF/BUB1B/ESPL1/MAD2L1/CDT1/CENPE/TACC3/FBXO5	17	BP
GO:0051306	mitotic sister chromatid separation	17/401	49/17910	2.15337e-16	2.56724e-14	2.22303e-14	CDC20/DLGAP5/AURKB/CDC6/TRIP13/TTK/CCNB1/NDC80/PLK1/CENPF/BUB1B/ESPL1/MAD2L1/CDT1/CENPE/TACC3/FBXO5	17	BP
GO:0007093	mitotic cell cycle checkpoint	26/401	147/17910	2.50921e-16	2.92025e-14	2.52871e-14	CDC20/AURKB/TRIP13/TTK/CDK1/CCNB1/BUB1/NDC80/PLK1/CENPF/BUB1B/AURKA/GTSE1/ZWINT/MAD2L1/CDT1/CDC25C/E2F1/CLSPN/BRCA1/E2F8/TICRR/E2F7/BLM/KNTC1/MUC1	26	BP
GO:1905818	regulation of chromosome separation	17/401	52/17910	6.83808e-16	7.77315e-14	6.73095e-14	CDC20/DLGAP5/AURKB/CDC6/TRIP13/TTK/CCNB1/NDC80/PLK1/CENPF/BUB1B/ESPL1/MAD2L1/CDT1/CENPE/TACC3/FBXO5	17	BP
GO:1901990	regulation of mitotic cell cycle phase transition	42/401	428/17910	7.5165e-16	8.35015e-14	7.23058e-14	UBE2C/TPX2/CDC20/ANLN/DLGAP5/NEK2/AURKB/CDCA5/CDC6/TRIP13/TTK/CDK1/CCNB1/NDC80/PLK1/CENPF/BUB1B/AURKA/GTSE1/ESPL1/HMMR/MAD2L1/CCNE1/CDT1/KIF14/CDC25C/DTL/E2F1/CLSPN/CENPE/PLK4/BRCA1/E2F8/EZH2/TICRR/CDC7/E2F7/CDKN2A/BLM/FBXO5/KNTC1/MUC1	42	BP
GO:0033047	regulation of mitotic sister chromatid segregation	17/401	57/17910	3.92803e-15	4.26671e-13	3.69465e-13	CDC20/DLGAP5/AURKB/CDC6/TRIP13/TTK/CCNB1/NDC80/PLK1/CENPF/BUB1B/ESPL1/MAD2L1/CDT1/CENPE/TACC3/FBXO5	17	BP
GO:0051304	chromosome separation	18/401	68/17910	6.26098e-15	6.65298e-13	5.76096e-13	CDC20/DLGAP5/AURKB/CDC6/TRIP13/NCAPH/TTK/CCNB1/NDC80/PLK1/CENPF/BUB1B/ESPL1/MAD2L1/CDT1/CENPE/TACC3/FBXO5	18	BP
GO:0006261	DNA-dependent DNA replication	23/401	130/17910	1.36758e-14	1.42228e-12	1.23158e-12	CDC6/CCNE1/GINS1/CDT1/DSCC1/MCM2/MCM4/GINS2/RAD51/HMGA1/E2F8/MCM6/RFC4/FEN1/POLE2/GINS4/TICRR/CDC7/MCM7/E2F7/BLM/PRIM1/FBXO5	23	BP
GO:0000922	spindle pole	24/411	152/18675	3.54944e-14	1.5233e-12	1.22985e-12	TPX2/CDC20/DLGAP5/NEK2/CDC6/CCNB1/PLK1/CENPF/SPAG5/CKAP2L/AURKA/FAM83D/KIF11/ASPM/PRC1/MAD2L1/SGO1/AUNIP/TACC3/POC1A/PSRC1/WDR62/KIF20B/KNTC1	24	CC
GO:0030071	regulation of mitotic metaphase/anaphase transition	15/401	44/17910	1.74798e-14	1.78003e-12	1.54137e-12	CDC20/DLGAP5/AURKB/CDC6/TRIP13/TTK/CCNB1/NDC80/PLK1/CENPF/ESPL1/MAD2L1/CDT1/CENPE/FBXO5	15	BP
GO:0043232	intracellular non-membrane-bounded organelle	166/411	4464/18675	5.3866e-14	2.13392e-12	1.72284e-12	MYBL2/TPX2/CDC20/BIRC5/TOP2A/ANLN/KIF2C/CENPA/HJURP/KIF4A/DLGAP5/NEK2/CEP55/AURKB/CDCA5/KIF18B/CDC6/NCAPH/KIFC1/NUF2/NCAPG/CCNB2/TTK/CDCA8/MKI67/CDK1/CCNB1/BUB1/CDC45/NDC80/PLK1/KIF23/CENPF/SPAG5/CKAP2L/BUB1B/MCM10/AURKA/PIMREG/FAM83D/SKA1/KIF11/SLC2A1/GTSE1/ASPM/KIF20A/PRC1/ZWINT/CENPW/UBE2T/TNNT1/ESPL1/HMMR/NUSAP1/MAD2L1/SKA3/RAD51AP1/CDT1/UHRF1/ORC1/SPC25/KIF14/ASF1B/SAPCD2/CDCA2/PKMYT1/RACGAP…	166	CC
GO:0030496	midbody	25/411	171/18675	6.37874e-14	2.22813e-12	1.7989e-12	BIRC5/ANLN/KIF4A/NEK2/CEP55/AURKB/CDCA8/CDK1/PLK1/KIF23/CENPF/SPAG5/AURKA/SLC2A1/ASPM/KIF20A/PRC1/KIF14/RACGAP1/CENPE/SHCBP1/ECT2/PSRC1/KIF20B/INCENP	25	CC
GO:0043228	non-membrane-bounded organelle	166/411	4473/18675	6.48971e-14	2.22813e-12	1.7989e-12	MYBL2/TPX2/CDC20/BIRC5/TOP2A/ANLN/KIF2C/CENPA/HJURP/KIF4A/DLGAP5/NEK2/CEP55/AURKB/CDCA5/KIF18B/CDC6/NCAPH/KIFC1/NUF2/NCAPG/CCNB2/TTK/CDCA8/MKI67/CDK1/CCNB1/BUB1/CDC45/NDC80/PLK1/KIF23/CENPF/SPAG5/CKAP2L/BUB1B/MCM10/AURKA/PIMREG/FAM83D/SKA1/KIF11/SLC2A1/GTSE1/ASPM/KIF20A/PRC1/ZWINT/CENPW/UBE2T/TNNT1/ESPL1/HMMR/NUSAP1/MAD2L1/SKA3/RAD51AP1/CDT1/UHRF1/ORC1/SPC25/KIF14/ASF1B/SAPCD2/CDCA2/PKMYT1/RACGAP…	166	CC
GO:0006323	DNA packaging	27/401	194/17910	3.16048e-14	3.15274e-12	2.73003e-12	TOP2A/CENPA/HJURP/CDCA5/NCAPH/NCAPG/CDK1/CCNB1/CENPW/NUSAP1/ASF1B/MCM2/CENPU/OIP5/CENPI/HMGA1/NCAPG2/CENPM/KNL1/CENPK/CENPN/HELLS/CDKN2A/NCAPD2/CENPH/CHAF1B/HMGB2	27	BP
GO:1902099	regulation of metaphase/anaphase transition of cell cycle	15/401	46/17910	3.73504e-14	3.65138e-12	3.16181e-12	CDC20/DLGAP5/AURKB/CDC6/TRIP13/TTK/CCNB1/NDC80/PLK1/CENPF/ESPL1/MAD2L1/CDT1/CENPE/FBXO5	15	BP
GO:0045786	negative regulation of cell cycle	48/401	613/17910	3.81005e-14	3.65167e-12	3.16207e-12	CDC20/RRM2/FOXM1/NEK2/AURKB/CDKN3/CDC6/TRIP13/TTK/CDK1/CCNB1/BUB1/CDC45/NDC80/PLK1/CENPF/BUB1B/AURKA/GTSE1/ZWINT/ESPL1/MAD2L1/CDT1/CDC25C/DTL/E2F1/CLSPN/CHEK1/RAD51/BRCA1/E2F8/DDIAS/EZH2/TICRR/CDC7/BRIP1/E2F7/CXCL8/KIF20B/CDKN2A/BLM/FBXO5/KNTC1/CCNF/MUC1/HPGD/ALOX15B/SUSD2	48	BP
GO:0006974	cellular response to DNA damage stimulus	54/401	791/17910	2.35313e-13	2.21194e-11	1.91537e-11	TOP2A/FOXM1/CDCA5/TRIP13/CDK1/CCNB1/PLK1/EXO1/MCM10/AURKA/GTSE1/UBE2T/RAD54L/RAD51AP1/UHRF1/NEIL3/PCLAF/CDC25C/DTL/E2F1/CLSPN/CHEK1/AUNIP/RAD51/PTTG1/EME1/XRCC2/BRCA1/FANCI/E2F8/RFC4/DDIAS/FEN1/POLE2/POLQ/TICRR/EGLN3/PARPBP/PMAIP1/MCM7/TIMELESS/BRIP1/E2F7/BLM/CHAF1B/HMGB2/WDR76/FBXO5/ESCO2/PIF1/MACROD2/MUC1/CLU/SPATA18	54	BP
GO:0010948	negative regulation of cell cycle process	34/401	344/17910	4.01007e-13	3.69834e-11	3.20248e-11	CDC20/RRM2/NEK2/AURKB/TRIP13/TTK/CDK1/CCNB1/NDC80/PLK1/CENPF/AURKA/GTSE1/ESPL1/MAD2L1/CDT1/CDC25C/DTL/E2F1/CLSPN/CHEK1/RAD51/BRCA1/E2F8/EZH2/TICRR/CDC7/E2F7/CDKN2A/BLM/FBXO5/CCNF/MUC1/SUSD2	34	BP
GO:0008608	attachment of spindle microtubules to kinetochore	12/401	29/17910	4.96142e-13	4.49101e-11	3.88887e-11	KIF2C/NEK2/AURKB/CCNB1/NDC80/SPAG5/CDT1/RACGAP1/SGO1/CENPE/ECT2/KNL1	12	BP
GO:0033044	regulation of chromosome organization	31/401	311/17910	3.64049e-12	3.23337e-10	2.79985e-10	CDC20/TOP2A/DLGAP5/NEK2/AURKB/CDCA5/CDC6/TRIP13/TTK/MKI67/CCNB1/BUB1/NDC80/PLK1/CENPF/BUB1B/ESPL1/MAD2L1/CDT1/MCM2/CENPE/CHEK1/HMGA1/BRCA1/TACC3/FEN1/FBXO5/RMI2/PIF1/MUC1/LRRK2	31	BP
GO:1901988	negative regulation of cell cycle phase transition	28/401	254/17910	3.70435e-12	3.23337e-10	2.79985e-10	CDC20/AURKB/TRIP13/TTK/CDK1/CCNB1/NDC80/PLK1/CENPF/AURKA/GTSE1/MAD2L1/CDT1/CDC25C/DTL/E2F1/CLSPN/CHEK1/BRCA1/E2F8/EZH2/TICRR/E2F7/CDKN2A/BLM/FBXO5/MUC1/SUSD2	28	BP
GO:0005815	microtubule organizing center	46/411	681/18675	1.39095e-11	4.47711e-10	3.61463e-10	TPX2/CDC20/TOP2A/DLGAP5/NEK2/CEP55/KIFC1/CCNB2/CDK1/CCNB1/CDC45/NDC80/PLK1/KIF23/CENPF/SPAG5/CKAP2L/BUB1B/AURKA/ASPM/ESPL1/HMMR/PCLAF/SGO1/KIF15/CENPU/DTL/E2F1/CHEK1/AUNIP/RAD51/PLK4/XRCC2/BRCA1/TACC3/STIL/POC1A/HASPIN/WDR62/KIF18A/SLC16A1/KIF20B/CCNF/SNCG/CDKL2/MACROD2	46	CC
GO:0042599	lamellar body	9/411	17/18675	2.30983e-11	6.74562e-10	5.44613e-10	SPINK5/CTSH/ABCA3/SFTA3/SFTPA2/SFTPA1/NAPSA/SFTPC/SFTPB	9	CC
GO:0000940	condensed chromosome outer kinetochore	8/411	12/18675	2.35769e-11	6.74562e-10	5.44613e-10	CCNB1/BUB1/NDC80/PLK1/CENPF/BUB1B/SKA1/SKA3	8	CC
GO:0005856	cytoskeleton	91/411	2041/18675	2.80945e-11	7.6151e-10	6.14811e-10	TPX2/CDC20/BIRC5/TOP2A/ANLN/KIF2C/KIF4A/DLGAP5/NEK2/CEP55/AURKB/KIF18B/CDC6/KIFC1/CCNB2/TTK/CDCA8/CDK1/CCNB1/CDC45/NDC80/PLK1/KIF23/CENPF/SPAG5/CKAP2L/BUB1B/AURKA/FAM83D/SKA1/KIF11/SLC2A1/GTSE1/ASPM/KIF20A/PRC1/TNNT1/ESPL1/HMMR/MAD2L1/SKA3/KIF14/RACGAP1/PCLAF/MCM2/SGO1/KIF15/CENPU/PFN2/DTL/E2F1/CENPE/CHEK1/AUNIP/SHCBP1/ECT2/RAD51/PLK4/LMNB1/XRCC2/BRCA1/TACC3/DSP/STIL/STMN1/POC1A/IGF2BP2/CDC7/PSRC…	91	CC
GO:0034508	centromere complex assembly	14/401	54/17910	9.13199e-12	7.83108e-10	6.78112e-10	CENPA/HJURP/CENPF/CENPW/CENPU/CENPE/OIP5/CENPI/CENPM/KNL1/CENPK/CENPN/HELLS/CENPH	14	BP
GO:0072686	mitotic spindle	17/411	97/18675	3.62447e-11	9.33301e-10	7.53508e-10	TPX2/AURKB/CDK1/KIF23/SPAG5/CKAP2L/AURKA/FAM83D/KIF11/ASPM/MAD2L1/RACGAP1/CENPE/ECT2/TACC3/CDC7/KIF20B	17	CC
GO:0051310	metaphase plate congression	14/401	55/17910	1.20034e-11	1.0116e-09	8.75967e-10	KIF2C/CDCA5/KIFC1/CDCA8/CCNB1/NDC80/CENPF/SPAG5/FAM83D/CDT1/KIF14/CENPE/PSRC1/KIF18A	14	BP
GO:0045930	negative regulation of mitotic cell cycle	30/401	308/17910	1.47415e-11	1.2213e-09	1.05755e-09	CDC20/AURKB/TRIP13/TTK/CDK1/CCNB1/BUB1/NDC80/PLK1/CENPF/BUB1B/AURKA/GTSE1/ZWINT/MAD2L1/CDT1/CDC25C/E2F1/CLSPN/CHEK1/BRCA1/E2F8/EZH2/TICRR/E2F7/CDKN2A/BLM/FBXO5/KNTC1/MUC1	30	BP
GO:0033046	negative regulation of sister chromatid segregation	12/401	37/17910	1.50634e-11	1.22716e-09	1.06263e-09	CDC20/AURKB/TRIP13/TTK/CCNB1/NDC80/PLK1/CENPF/ESPL1/MAD2L1/CDT1/FBXO5	12	BP
GO:0051985	negative regulation of chromosome segregation	12/401	38/17910	2.15748e-11	1.72881e-09	1.49702e-09	CDC20/AURKB/TRIP13/TTK/CCNB1/NDC80/PLK1/CENPF/ESPL1/MAD2L1/CDT1/FBXO5	12	BP
GO:0005876	spindle microtubule	13/411	53/18675	8.91288e-11	2.18578e-09	1.76471e-09	KIF4A/KIF18B/CDK1/PLK1/AURKA/SKA1/KIF11/PRC1/SKA3/CENPE/PSRC1/KIF18A/KNTC1	13	CC
GO:0044839	cell cycle G2/M phase transition	27/401	257/17910	2.79793e-11	2.20586e-09	1.9101e-09	TPX2/MELK/FOXM1/NEK2/AURKB/CCNA2/CCNB2/CDK1/CCNB1/PLK1/CENPF/AURKA/GTSE1/HMMR/KIF14/PKMYT1/CDC25C/DTL/CLSPN/CHEK1/PLK4/CDC25A/BRCA1/TICRR/CDC7/BLM/FBXO5	27	BP
GO:0005813	centrosome	36/411	473/18675	1.02766e-10	2.40566e-09	1.94223e-09	CDC20/DLGAP5/NEK2/CEP55/CCNB2/CDK1/CCNB1/CDC45/NDC80/PLK1/KIF23/CENPF/SPAG5/CKAP2L/AURKA/ASPM/ESPL1/HMMR/PCLAF/SGO1/KIF15/DTL/E2F1/CHEK1/AUNIP/PLK4/XRCC2/STIL/POC1A/HASPIN/WDR62/SLC16A1/KIF20B/CCNF/CDKL2/MACROD2	36	CC
GO:0050000	chromosome localization	15/401	72/17910	4.96193e-11	3.78968e-09	3.28157e-09	KIF2C/DLGAP5/CDCA5/KIFC1/CDCA8/CCNB1/NDC80/CENPF/SPAG5/FAM83D/CDT1/KIF14/CENPE/PSRC1/KIF18A	15	BP
GO:0051303	establishment of chromosome localization	15/401	72/17910	4.96193e-11	3.78968e-09	3.28157e-09	KIF2C/DLGAP5/CDCA5/KIFC1/CDCA8/CCNB1/NDC80/CENPF/SPAG5/FAM83D/CDT1/KIF14/CENPE/PSRC1/KIF18A	15	BP
GO:0031570	DNA integrity checkpoint	20/401	141/17910	5.05188e-11	3.79901e-09	3.28965e-09	CDC6/CDK1/CCNB1/CDC45/PLK1/AURKA/GTSE1/CDT1/CDC25C/DTL/E2F1/CLSPN/CHEK1/BRCA1/E2F8/TICRR/BRIP1/E2F7/BLM/MUC1	20	BP
GO:0045841	negative regulation of mitotic metaphase/anaphase transition	11/401	32/17910	5.23143e-11	3.8166e-09	3.30488e-09	CDC20/AURKB/TRIP13/TTK/CCNB1/NDC80/PLK1/CENPF/MAD2L1/CDT1/FBXO5	11	BP
GO:2000816	negative regulation of mitotic sister chromatid separation	11/401	32/17910	5.23143e-11	3.8166e-09	3.30488e-09	CDC20/AURKB/TRIP13/TTK/CCNB1/NDC80/PLK1/CENPF/MAD2L1/CDT1/FBXO5	11	BP
GO:0000228	nuclear chromosome	37/411	507/18675	1.84241e-10	4.12539e-09	3.33067e-09	BIRC5/TOP2A/CENPA/NEK2/AURKB/CDCA5/CDK1/CCNB1/BUB1/NDC80/PLK1/RAD51AP1/UHRF1/ORC1/ASF1B/MCM2/MCM4/SGO1/E2F1/CHEK1/RAD51/EME1/BRCA1/MCM6/FEN1/EZH2/POLE2/MCM7/TIMELESS/INCENP/NCAPD2/BLM/CHAF1B/HMGB2/ESCO2/PIF1/MUC1	37	CC
GO:0032392	DNA geometric change	16/401	86/17910	6.85273e-11	4.92591e-09	4.26546e-09	TOP2A/CDC45/RAD54L/GINS1/MCM2/MCM4/GINS2/RECQL4/RAD51/HMGA1/MCM6/GINS4/MCM7/BRIP1/BLM/HMGB2	16	BP
GO:1902100	negative regulation of metaphase/anaphase transition of cell cycle	11/401	33/17910	7.69073e-11	5.37033e-09	4.65029e-09	CDC20/AURKB/TRIP13/TTK/CCNB1/NDC80/PLK1/CENPF/MAD2L1/CDT1/FBXO5	11	BP
GO:1905819	negative regulation of chromosome separation	11/401	33/17910	7.69073e-11	5.37033e-09	4.65029e-09	CDC20/AURKB/TRIP13/TTK/CCNB1/NDC80/PLK1/CENPF/MAD2L1/CDT1/FBXO5	11	BP
GO:0007010	cytoskeleton organization	61/401	1124/17910	1.02231e-10	7.03811e-09	6.09446e-09	MYBL2/TPX2/CDC20/ANLN/KIF2C/CENPA/KIF4A/NEK2/AURKB/KIF18B/KIFC1/TTK/CDK1/CCNB1/NDC80/PLK1/KIF23/SPAG5/AURKA/SKA1/KIF11/ASPM/KIF20A/PRC1/ESPL1/NUSAP1/MAD2L1/SKA3/SPC25/SAPCD2/RACGAP1/PCLAF/SGO1/PFN2/CENPE/CHEK1/AUNIP/ECT2/PLK4/XRCC2/BRCA1/TACC3/DSP/STIL/STMN1/POC1A/DIAPH3/PSRC1/KRT6A/WDR62/KIF18A/SLC16A1/FBXO5/CCNF/TPPP3/DES/DLC1/SHH/AQP1/ELN/PLA2G1B	61	BP
GO:0000910	cytokinesis	20/401	147/17910	1.09222e-10	7.41498e-09	6.4208e-09	ANLN/CENPA/KIF4A/CEP55/AURKB/CDC6/PLK1/KIF23/KIF20A/PRC1/ESPL1/NUSAP1/KIF14/RACGAP1/ECT2/E2F8/STMN1/E2F7/KIF20B/INCENP	20	BP
GO:0005654	nucleoplasm	127/411	3427/18675	3.57963e-10	7.68129e-09	6.20155e-09	MYBL2/UBE2C/TPX2/CDC20/BIRC5/TOP2A/ANLN/CENPA/HJURP/KIF4A/FOXM1/NEK2/AURKB/CDCA5/KIF18B/CDC6/CCNA2/CDCA8/MKI67/CDK1/CCNB1/BUB1/CDC45/NDC80/PLK1/KIF23/CENPF/EXO1/MCM10/AURKA/GTSE1/KIF20A/ZWINT/CENPW/UBE2T/RAD54L/KPNA2/MAD2L1/CCNE1/GINS1/RAD51AP1/CDT1/ORC1/ASF1B/NEIL3/CDCA2/UCHL1/PKMYT1/RACGAP1/PCLAF/DSCC1/MCM2/MCM4/SGO1/CDC25C/CENPU/DTL/E2F1/CLSPN/CENPE/GINS2/CHEK1/UBE2S/OIP5/ATAD2/RAD51/CENPI/HMG…	127	CC
GO:1901991	negative regulation of mitotic cell cycle phase transition	25/401	235/17910	1.17956e-10	7.89818e-09	6.83922e-09	CDC20/AURKB/TRIP13/TTK/CDK1/CCNB1/NDC80/PLK1/CENPF/AURKA/GTSE1/MAD2L1/CDT1/CDC25C/E2F1/CLSPN/BRCA1/E2F8/EZH2/TICRR/E2F7/CDKN2A/BLM/FBXO5/MUC1	25	BP
GO:0000086	G2/M transition of mitotic cell cycle	25/401	238/17910	1.54972e-10	1.02365e-08	8.86403e-09	TPX2/MELK/FOXM1/NEK2/AURKB/CCNA2/CCNB2/CDK1/CCNB1/PLK1/CENPF/AURKA/HMMR/KIF14/PKMYT1/CDC25C/DTL/CLSPN/PLK4/CDC25A/BRCA1/TICRR/CDC7/BLM/FBXO5	25	BP
GO:0033048	negative regulation of mitotic sister chromatid segregation	11/401	35/17910	1.59254e-10	1.03791e-08	8.98749e-09	CDC20/AURKB/TRIP13/TTK/CCNB1/NDC80/PLK1/CENPF/MAD2L1/CDT1/FBXO5	11	BP
GO:0051383	kinetochore organization	9/401	20/17910	1.74676e-10	1.12344e-08	9.72814e-09	CENPA/NDC80/CENPF/CENPW/CDT1/CENPE/CENPK/CENPN/CENPH	9	BP
GO:0045839	negative regulation of mitotic nuclear division	12/401	45/17910	1.98928e-10	1.2628e-08	1.09349e-08	CDC20/AURKB/TRIP13/TTK/CCNB1/NDC80/PLK1/CENPF/MAD2L1/CDT1/CHEK1/FBXO5	12	BP
GO:0031055	chromatin remodeling at centromere	12/401	46/17910	2.63752e-10	1.65284e-08	1.43124e-08	CENPA/HJURP/CENPW/CENPU/OIP5/CENPI/CENPM/KNL1/CENPK/CENPN/HELLS/CENPH	12	BP
GO:0071459	protein localization to chromosome, centromeric region	9/401	21/17910	2.99669e-10	1.85415e-08	1.60555e-08	CENPA/AURKB/TTK/CDK1/NDC80/BUB1B/CDT1/KNL1/HASPIN	9	BP
GO:0008283	cell proliferation	87/401	1969/17910	3.04246e-10	1.85894e-08	1.6097e-08	CDC20/BIRC5/MELK/DLGAP5/FOXM1/AURKB/CDKN3/CDC6/CCNA2/TTK/MKI67/CDK1/CCNB1/BUB1/CENPF/MMP12/MCM10/FAM83D/ASPM/PRC1/GINS1/IQGAP3/UHRF1/KIF14/SAPCD2/UCHL1/RACGAP1/CIP2A/PRAME/CDC25C/E2F1/SHCBP1/HMGA1/CDC25A/NCAPG2/BRCA1/FOSL1/SERPINB5/FAM83A/E2F8/CXCL10/EZH2/TXNRD1/CKS2/KIF1A/GINS4/EGLN3/CDC7/CKS1B/MCM7/KRT6A/GAL/GREM1/STC1/HILPDA/BRIP1/CTHRC1/E2F7/CXCL8/KIF20B/HELLS/CDKN2A/HMGB2/SPHK1/FBXO5/SKP2/AP…	87	BP
GO:0000281	mitotic cytokinesis	14/401	69/17910	3.2061e-10	1.93474e-08	1.67534e-08	ANLN/CENPA/KIF4A/CEP55/PLK1/KIF23/KIF20A/ESPL1/NUSAP1/RACGAP1/ECT2/STMN1/KIF20B/INCENP	14	BP
GO:0061640	cytoskeleton-dependent cytokinesis	15/401	82/17910	3.49095e-10	2.08095e-08	1.80194e-08	ANLN/CENPA/KIF4A/CEP55/AURKB/PLK1/KIF23/KIF20A/ESPL1/NUSAP1/RACGAP1/ECT2/STMN1/KIF20B/INCENP	15	BP
GO:0000083	regulation of transcription involved in G1/S transition of mitotic cell cycle	10/401	29/17910	3.8798e-10	2.28487e-08	1.97852e-08	RRM2/CDC6/CDC45/CCNE1/CDT1/ORC1/E2F1/TYMS/E2F7/FBXO5	10	BP
GO:0006270	DNA replication initiation	10/401	30/17910	5.7044e-10	3.16853e-08	2.74371e-08	CDC6/CCNE1/CDT1/MCM2/MCM4/MCM6/POLE2/TICRR/MCM7/PRIM1	10	BP
GO:0007094	mitotic spindle assembly checkpoint	10/401	30/17910	5.7044e-10	3.16853e-08	2.74371e-08	CDC20/AURKB/TRIP13/TTK/CCNB1/NDC80/PLK1/CENPF/MAD2L1/CDT1	10	BP
GO:0031577	spindle checkpoint	10/401	30/17910	5.7044e-10	3.16853e-08	2.74371e-08	CDC20/AURKB/TRIP13/TTK/CCNB1/NDC80/PLK1/CENPF/MAD2L1/CDT1	10	BP
GO:0071173	spindle assembly checkpoint	10/401	30/17910	5.7044e-10	3.16853e-08	2.74371e-08	CDC20/AURKB/TRIP13/TTK/CCNB1/NDC80/PLK1/CENPF/MAD2L1/CDT1	10	BP
GO:0071174	mitotic spindle checkpoint	10/401	30/17910	5.7044e-10	3.16853e-08	2.74371e-08	CDC20/AURKB/TRIP13/TTK/CCNB1/NDC80/PLK1/CENPF/MAD2L1/CDT1	10	BP
GO:0033043	regulation of organelle organization	60/401	1147/17910	6.28639e-10	3.45257e-08	2.98966e-08	UBE2C/TPX2/CDC20/TOP2A/ANLN/DLGAP5/NEK2/AURKB/CDCA5/CDC6/TRIP13/TTK/MKI67/CCNB1/BUB1/NDC80/PLK1/CENPF/SPAG5/BUB1B/AURKA/SKA1/KIF11/ESPL1/NUSAP1/MAD2L1/SKA3/CDT1/PKMYT1/MCM2/CDC25C/PFN2/E2F1/CENPE/CHEK1/ECT2/PLK4/HMGA1/BRCA1/TACC3/FEN1/STIL/STMN1/POC1A/PMAIP1/PSRC1/KIF18A/GZMB/KIF20B/SPHK1/FBXO5/KNTC1/RMI2/CCNF/PIF1/MUC1/DLC1/CLU/ELN/LRRK2	60	BP
GO:0051302	regulation of cell division	20/401	162/17910	6.39156e-10	3.47133e-08	3.0059e-08	AURKB/KIF18B/CDC6/PLK1/KIF23/ASPM/KIF20A/PRC1/KIF14/RACGAP1/ECT2/ORC6/E2F8/E2F7/KIF20B/INCENP/BLM/SHH/VEGFD/SUSD2	20	BP
GO:0007080	mitotic metaphase plate congression	11/401	41/17910	1.0688e-09	5.74096e-08	4.97123e-08	KIF2C/CDCA5/KIFC1/CDCA8/CCNB1/NDC80/CDT1/KIF14/CENPE/PSRC1/KIF18A	11	BP
GO:0032508	DNA duplex unwinding	14/401	76/17910	1.23613e-09	6.51299e-08	5.63975e-08	TOP2A/CDC45/GINS1/MCM2/MCM4/GINS2/RECQL4/RAD51/HMGA1/MCM6/GINS4/MCM7/BRIP1/BLM	14	BP
GO:0051784	negative regulation of nuclear division	12/401	52/17910	1.23917e-09	6.51299e-08	5.63975e-08	CDC20/AURKB/TRIP13/TTK/CCNB1/NDC80/PLK1/CENPF/MAD2L1/CDT1/CHEK1/FBXO5	12	BP
GO:0051225	spindle assembly	15/401	90/17910	1.36267e-09	7.08588e-08	6.13583e-08	MYBL2/TPX2/CDC20/KIF4A/NEK2/AURKB/KIFC1/PLK1/KIF23/SPAG5/AURKA/KIF11/ASPM/RACGAP1/FBXO5	15	BP
GO:0034080	CENP-A containing nucleosome assembly	11/401	42/17910	1.41921e-09	7.22614e-08	6.25728e-08	CENPA/HJURP/CENPW/CENPU/OIP5/CENPI/CENPM/KNL1/CENPK/CENPN/CENPH	11	BP
GO:0061641	CENP-A containing chromatin organization	11/401	42/17910	1.41921e-09	7.22614e-08	6.25728e-08	CENPA/HJURP/CENPW/CENPU/OIP5/CENPI/CENPM/KNL1/CENPK/CENPN/CENPH	11	BP
GO:0006336	DNA replication-independent nucleosome assembly	12/401	53/17910	1.56982e-09	7.82988e-08	6.78008e-08	CENPA/HJURP/CENPW/ASF1B/CENPU/OIP5/CENPI/CENPM/KNL1/CENPK/CENPN/CENPH	12	BP
GO:0034724	DNA replication-independent nucleosome organization	12/401	53/17910	1.56982e-09	7.82988e-08	6.78008e-08	CENPA/HJURP/CENPW/ASF1B/CENPU/OIP5/CENPI/CENPM/KNL1/CENPK/CENPN/CENPH	12	BP
GO:0045931	positive regulation of mitotic cell cycle	19/401	154/17910	1.74099e-09	8.59593e-08	7.44342e-08	UBE2C/DLGAP5/CDCA5/CDC6/CDK1/CCNB1/NDC80/AURKA/ESPL1/NUSAP1/MAD2L1/CCNE1/CDT1/DTL/EIF4EBP1/CDC7/KIF20B/SPHK1/FBXO5	19	BP
GO:0033554	cellular response to stress	83/401	1914/17910	2.13857e-09	1.04533e-07	9.05179e-08	TOP2A/MELK/FOXM1/CDCA5/TRIP13/CCNA2/PBK/CDK1/CCNB1/PLK1/EXO1/MCM10/AURKA/SLC2A1/GTSE1/CTSV/UBE2T/MAGEA3/RAD54L/RAD51AP1/UHRF1/NEIL3/PCLAF/CDC25C/DTL/E2F1/CLSPN/CHEK1/AUNIP/ECT2/RAD51/HMGA1/PTTG1/EME1/XRCC2/BRCA1/FANCI/E2F8/RFC4/DDIAS/CXCL10/FEN1/EIF4EBP1/EZH2/TXNRD1/POLE2/POLQ/TICRR/EGLN3/PARPBP/PMAIP1/MCM7/TIMELESS/STC1/HILPDA/BRIP1/E2F7/CXCL8/CDKN2A/STC2/SEMA3A/BLM/CHAF1B/HMGB2/WDR76/SPHK1/FBXO…	83	BP
GO:2001251	negative regulation of chromosome organization	17/401	125/17910	2.79765e-09	1.35395e-07	1.17242e-07	CDC20/TOP2A/AURKB/TRIP13/TTK/CCNB1/NDC80/PLK1/CENPF/ESPL1/MAD2L1/CDT1/MCM2/HMGA1/BRCA1/FBXO5/PIF1	17	BP
GO:0006268	DNA unwinding involved in DNA replication	6/401	8/17910	3.27276e-09	1.56836e-07	1.35808e-07	MCM2/MCM4/RAD51/HMGA1/MCM6/MCM7	6	BP
GO:0000794	condensed nuclear chromosome	13/411	75/18675	8.64841e-09	1.78157e-07	1.43837e-07	CENPA/NEK2/AURKB/CCNB1/BUB1/NDC80/PLK1/SGO1/CHEK1/RAD51/BRCA1/INCENP/BLM	13	CC
GO:0007098	centrosome cycle	16/401	112/17910	3.96789e-09	1.88301e-07	1.63054e-07	NEK2/CDK1/PLK1/AURKA/KIF11/PCLAF/SGO1/CHEK1/PLK4/XRCC2/BRCA1/STIL/POC1A/WDR62/SLC16A1/CCNF	16	BP
GO:0044454	nuclear chromosome part	32/411	469/18675	1.6602e-08	3.28847e-07	2.65497e-07	CENPA/AURKB/CDCA5/CDK1/CCNB1/BUB1/NDC80/PLK1/RAD51AP1/UHRF1/ORC1/ASF1B/MCM2/MCM4/SGO1/E2F1/RAD51/EME1/BRCA1/MCM6/FEN1/EZH2/POLE2/MCM7/TIMELESS/INCENP/BLM/CHAF1B/HMGB2/ESCO2/PIF1/MUC1	32	CC
GO:0072401	signal transduction involved in DNA integrity checkpoint	13/401	73/17910	7.48222e-09	3.48315e-07	3.01614e-07	CDK1/CCNB1/PLK1/AURKA/GTSE1/CDC25C/DTL/E2F1/CHEK1/BRCA1/E2F8/E2F7/MUC1	13	BP
GO:0072422	signal transduction involved in DNA damage checkpoint	13/401	73/17910	7.48222e-09	3.48315e-07	3.01614e-07	CDK1/CCNB1/PLK1/AURKA/GTSE1/CDC25C/DTL/E2F1/CHEK1/BRCA1/E2F8/E2F7/MUC1	13	BP
GO:0072395	signal transduction involved in cell cycle checkpoint	13/401	74/17910	8.89475e-09	4.10165e-07	3.55172e-07	CDK1/CCNB1/PLK1/AURKA/GTSE1/CDC25C/DTL/E2F1/CHEK1/BRCA1/E2F8/E2F7/MUC1	13	BP
GO:0031497	chromatin assembly	18/401	153/17910	1.00527e-08	4.59231e-07	3.97659e-07	CENPA/HJURP/CENPW/ASF1B/MCM2/CENPU/OIP5/CENPI/HMGA1/CENPM/KNL1/CENPK/CENPN/HELLS/CDKN2A/CENPH/CHAF1B/HMGB2	18	BP
GO:0006281	DNA repair	34/401	502/17910	1.04647e-08	4.73625e-07	4.10122e-07	FOXM1/CDCA5/TRIP13/CDK1/EXO1/UBE2T/RAD54L/RAD51AP1/UHRF1/NEIL3/PCLAF/DTL/CLSPN/CHEK1/AUNIP/RAD51/PTTG1/EME1/XRCC2/BRCA1/FANCI/RFC4/FEN1/POLE2/POLQ/TICRR/PARPBP/TIMELESS/BRIP1/BLM/CHAF1B/HMGB2/ESCO2/PIF1	34	BP
GO:0008094	DNA-dependent ATPase activity	14/390	72/16967	8.11753e-10	5.93392e-07	5.23794e-07	TOP2A/DSCC1/MCM4/RECQL4/RAD51/XRCC2/MCM6/RFC4/ERCC6L/POLQ/MCM7/BRIP1/BLM/PIF1	14	MF
GO:0031023	microtubule organizing center organization	16/401	122/17910	1.39999e-08	6.27812e-07	5.43637e-07	NEK2/CDK1/PLK1/AURKA/KIF11/PCLAF/SGO1/CHEK1/PLK4/XRCC2/BRCA1/STIL/POC1A/WDR62/SLC16A1/CCNF	16	BP
GO:0000780	condensed nuclear chromosome, centromeric region	7/411	17/18675	3.82116e-08	7.28851e-07	5.88444e-07	CENPA/AURKB/CCNB1/BUB1/NDC80/PLK1/SGO1	7	CC
GO:0022414	reproductive process	63/401	1353/17910	2.05873e-08	9.14825e-07	7.92168e-07	CDC20/TOP2A/NEK2/TRIP13/NCAPH/KIFC1/TTK/CDK1/CCNB1/PLK1/EXO1/AURKA/SLC2A1/ASPM/CTSV/ESPL1/RAD54L/ASF1B/RACGAP1/CIP2A/SGO1/CDC25C/E2F1/RPL39L/RAD51/CENPI/PLK4/PTTG1/XRCC2/FOSL1/SERPINB5/E2F8/SGO2/CKS2/POC1A/KNL1/TESMIN/KIF18A/STC1/BRIP1/E2F7/ABCC2/STC2/SEMA3A/HMGB2/FBXO5/CCNF/CLGN/GJB2/CDKL2/TSPAN8/WFDC2/SHH/NKX2-1/SPINK1/HPGD/ROS1/PPP1R1B/LRRK2/ALOX15B/ALPL/GJB1/SCGB1A1	63	BP
GO:0000003	reproduction	63/401	1354/17910	2.11634e-08	9.31954e-07	8.07001e-07	CDC20/TOP2A/NEK2/TRIP13/NCAPH/KIFC1/TTK/CDK1/CCNB1/PLK1/EXO1/AURKA/SLC2A1/ASPM/CTSV/ESPL1/RAD54L/ASF1B/RACGAP1/CIP2A/SGO1/CDC25C/E2F1/RPL39L/RAD51/CENPI/PLK4/PTTG1/XRCC2/FOSL1/SERPINB5/E2F8/SGO2/CKS2/POC1A/KNL1/TESMIN/KIF18A/STC1/BRIP1/E2F7/ABCC2/STC2/SEMA3A/HMGB2/FBXO5/CCNF/CLGN/GJB2/CDKL2/TSPAN8/WFDC2/SHH/NKX2-1/SPINK1/HPGD/ROS1/PPP1R1B/LRRK2/ALOX15B/ALPL/GJB1/SCGB1A1	63	BP
GO:0030261	chromosome condensation	9/401	32/17910	2.29867e-08	1.00321e-06	8.687e-07	TOP2A/CDCA5/NCAPH/NCAPG/CDK1/CCNB1/NUSAP1/NCAPG2/NCAPD2	9	BP
GO:0034501	protein localization to kinetochore	7/401	16/17910	2.57329e-08	1.10336e-06	9.55421e-07	AURKB/TTK/CDK1/NDC80/CDT1/KNL1/HASPIN	7	BP
GO:0051382	kinetochore assembly	7/401	16/17910	2.57329e-08	1.10336e-06	9.55421e-07	CENPA/CENPF/CENPW/CENPE/CENPK/CENPN/CENPH	7	BP
GO:0031145	anaphase-promoting complex-dependent catabolic process	13/401	81/17910	2.76865e-08	1.1768e-06	1.01902e-06	UBE2C/CDC20/AURKB/CDK1/CCNB1/PLK1/BUB1B/AURKA/MAD2L1/UBE2S/PTTG1/FBXO5/ECRG4	13	BP
GO:1902749	regulation of cell cycle G2/M phase transition	20/401	202/17910	2.98742e-08	1.25884e-06	1.09006e-06	TPX2/NEK2/AURKB/CDK1/CCNB1/PLK1/CENPF/AURKA/GTSE1/HMMR/KIF14/DTL/CLSPN/CHEK1/PLK4/BRCA1/TICRR/CDC7/BLM/FBXO5	20	BP
GO:0043486	histone exchange	11/401	55/17910	3.05482e-08	1.27624e-06	1.10512e-06	CENPA/HJURP/CENPW/CENPU/OIP5/CENPI/CENPM/KNL1/CENPK/CENPN/CENPH	11	BP
GO:0034502	protein localization to chromosome	13/401	82/17910	3.22433e-08	1.33362e-06	1.15481e-06	CENPA/AURKB/CDCA5/TTK/CDK1/NDC80/PLK1/BUB1B/CDT1/EZH2/KNL1/HASPIN/ESCO2	13	BP
GO:0051321	meiotic cell cycle	20/401	203/17910	3.24674e-08	1.33362e-06	1.15481e-06	CDC20/TOP2A/NEK2/TRIP13/NCAPH/TTK/PLK1/EXO1/AURKA/ASPM/ESPL1/RAD54L/SGO1/RAD51/XRCC2/SGO2/CKS2/KIF18A/BRIP1/FBXO5	20	BP
GO:1901989	positive regulation of cell cycle phase transition	14/401	97/17910	3.28298e-08	1.33727e-06	1.15797e-06	UBE2C/DLGAP5/CDCA5/CDC6/CDK1/CCNB1/FAM83D/ESPL1/CCNE1/CDT1/DTL/EZH2/CDC7/FBXO5	14	BP
GO:0032465	regulation of cytokinesis	13/401	83/17910	3.74651e-08	1.51347e-06	1.31055e-06	AURKB/CDC6/PLK1/KIF23/KIF20A/PRC1/KIF14/RACGAP1/ECT2/E2F8/E2F7/KIF20B/INCENP	13	BP
GO:0000778	condensed nuclear chromosome kinetochore	5/411	7/18675	1.02064e-07	1.87724e-06	1.51561e-06	CENPA/CCNB1/BUB1/NDC80/PLK1	5	CC
GO:0000077	DNA damage checkpoint	16/401	133/17910	4.86485e-08	1.94913e-06	1.6878e-06	CDK1/CCNB1/PLK1/AURKA/GTSE1/CDC25C/DTL/E2F1/CLSPN/CHEK1/BRCA1/E2F8/BRIP1/E2F7/BLM/MUC1	16	BP
GO:0070507	regulation of microtubule cytoskeleton organization	18/401	170/17910	5.27013e-08	2.09434e-06	1.81354e-06	TPX2/NEK2/PLK1/SPAG5/AURKA/SKA1/KIF11/SKA3/CHEK1/PLK4/BRCA1/TACC3/STIL/STMN1/POC1A/PSRC1/KIF18A/CCNF	18	BP
GO:0065004	protein-DNA complex assembly	20/401	210/17910	5.72964e-08	2.25859e-06	1.95576e-06	CENPA/HJURP/CENPF/CENPW/CDT1/ASF1B/MCM2/CENPU/CENPE/OIP5/RAD51/CENPI/CENPM/KNL1/CENPK/CENPN/HELLS/CENPH/CHAF1B/HMGB2	20	BP
GO:0051782	negative regulation of cell division	7/401	18/17910	6.88608e-08	2.69273e-06	2.3317e-06	AURKB/ASPM/ORC6/E2F8/E2F7/BLM/SUSD2	7	BP
GO:0000942	condensed nuclear chromosome outer kinetochore	4/411	4/18675	2.31263e-07	3.97002e-06	3.20522e-06	CCNB1/BUB1/NDC80/PLK1	4	CC
GO:0031262	Ndc80 complex	4/411	4/18675	2.31263e-07	3.97002e-06	3.20522e-06	NUF2/NDC80/SPC25/SPC24	4	CC
GO:0006333	chromatin assembly or disassembly	18/401	178/17910	1.06937e-07	4.14849e-06	3.59228e-06	CENPA/HJURP/CENPW/ASF1B/MCM2/CENPU/OIP5/CENPI/HMGA1/CENPM/KNL1/CENPK/CENPN/HELLS/CDKN2A/CENPH/CHAF1B/HMGB2	18	BP
GO:0071824	protein-DNA complex subunit organization	21/401	240/17910	1.14891e-07	4.42193e-06	3.82905e-06	CENPA/HJURP/CENPF/CENPW/CDT1/ASF1B/MCM2/CENPU/CENPE/OIP5/RAD51/CENPI/HMGA1/CENPM/KNL1/CENPK/CENPN/HELLS/CENPH/CHAF1B/HMGB2	21	BP
GO:0044421	extracellular region part	114/411	3312/18675	2.67919e-07	4.45091e-06	3.59348e-06	TPX2/KIF4A/CEP55/CDCA8/CDK1/KIF23/MMP12/SLC2A1/KIF20A/FGB/RACGAP1/GGH/PFN2/CHEK1/ATAD2/PSAT1/GNG4/PLOD2/COL11A1/DSP/COCH/STMN1/SLC7A5/TXNRD1/LYPD3/MTHFD2/CDC7/MELTF/KRT6A/GAL/GREM1/STC1/HILPDA/CTHRC1/SLC16A1/STC2/PFKP/HMGB2/SNCG/KLK6/ORM1/JCHAIN/C3/APOD/HAS3/BMP3/LGALS4/SLC44A4/MUC1/SCGB2A1/DES/TSPAN8/PTGDS/SERPIND1/CLEC3B/ECRG4/IL33/LPL/ADAMTS8/GPRC5C/WFDC2/CXCL14/CPB2/NDNF/SHH/B3GNT8/MMP28/FCGB…	114	CC
GO:0031981	nuclear lumen	143/411	4454/18675	2.86647e-07	4.61323e-06	3.72453e-06	MYBL2/UBE2C/TPX2/CDC20/BIRC5/TOP2A/ANLN/CENPA/HJURP/KIF4A/FOXM1/NEK2/AURKB/CDCA5/KIF18B/CDC6/CCNA2/CDCA8/MKI67/CDK1/CCNB1/BUB1/CDC45/NDC80/PLK1/KIF23/CENPF/EXO1/MCM10/AURKA/PIMREG/GTSE1/KIF20A/ZWINT/CENPW/UBE2T/RAD54L/KPNA2/MAD2L1/CCNE1/GINS1/RAD51AP1/CDT1/UHRF1/ORC1/ASF1B/SAPCD2/NEIL3/CDCA2/UCHL1/PKMYT1/RACGAP1/PCLAF/DSCC1/MCM2/MCM4/SPC24/SGO1/CDC25C/CENPU/DTL/E2F1/CLSPN/CENPE/GINS2/CHEK1/UBE2S/…	143	CC
GO:0051052	regulation of DNA metabolic process	28/401	403/17910	1.28894e-07	4.92215e-06	4.2622e-06	FOXM1/NEK2/AURKB/CDC6/CCNA2/CDK1/KPNA2/RAD51AP1/CDT1/DSCC1/CHEK1/AUNIP/RAD51/BRCA1/E2F8/RFC4/POLQ/TICRR/PARPBP/CDC7/GREM1/TIMELESS/E2F7/BLM/FBXO5/ESCO2/PIF1/PARM1	28	BP
GO:0007062	sister chromatid cohesion	10/401	50/17910	1.30779e-07	4.95541e-06	4.291e-06	CDC20/CDCA5/BUB1/PLK1/ESPL1/DSCC1/SGO1/FEN1/SGO2/HASPIN	10	BP
GO:0072331	signal transduction by p53 class mediator	22/401	264/17910	1.35437e-07	5.09245e-06	4.40967e-06	TPX2/FOXM1/AURKB/CDK1/CCNB1/EXO1/AURKA/GTSE1/CDC25C/E2F1/CHEK1/BRCA1/E2F8/RFC4/PMAIP1/E2F2/BRIP1/E2F7/BLM/RMI2/MUC1/ZNF385B	22	BP
GO:0005874	microtubule	25/411	357/18675	3.93245e-07	6.137e-06	4.95476e-06	TPX2/KIF2C/KIF4A/NEK2/KIF18B/CDK1/PLK1/SPAG5/AURKA/SKA1/KIF11/GTSE1/ASPM/PRC1/SKA3/KIF14/RACGAP1/CENPE/STMN1/PSRC1/KIF18A/INCENP/TUBB2B/KNTC1/SCTR	25	CC
GO:0010389	regulation of G2/M transition of mitotic cell cycle	18/401	185/17910	1.92151e-07	7.16647e-06	6.20561e-06	TPX2/NEK2/AURKB/CDK1/CCNB1/PLK1/CENPF/AURKA/HMMR/KIF14/DTL/CLSPN/PLK4/BRCA1/TICRR/CDC7/BLM/FBXO5	18	BP
GO:0090307	mitotic spindle assembly	10/401	52/17910	1.9353e-07	7.16647e-06	6.20561e-06	MYBL2/TPX2/CDC20/KIF4A/AURKB/KIFC1/PLK1/KIF23/KIF11/RACGAP1	10	BP
GO:0006950	response to stress	129/401	3822/17910	2.22957e-07	8.19408e-06	7.09544e-06	TOP2A/MELK/FOXM1/CDCA5/TRIP13/CCNA2/PBK/CDK1/CCNB1/PLK1/MMP12/EXO1/MCM10/AURKA/SLC2A1/GTSE1/CTSV/UBE2T/MAGEA3/RAD54L/RAD51AP1/FGB/UHRF1/NEIL3/UCHL1/PCLAF/CDC25C/DTL/E2F1/CLSPN/CHEK1/AUNIP/ECT2/RAD51/HMGA1/PTTG1/PLOD2/EME1/XRCC2/BRCA1/FOSL1/FANCI/E2F8/COCH/RFC4/DDIAS/CXCL10/GCLC/FEN1/APOBEC3B/EIF4EBP1/EZH2/TXNRD1/POLE2/POLQ/TICRR/EGLN3/PARPBP/PMAIP1/MCM7/KRT6A/GAL/TIMELESS/STC1/HILPDA/BRIP1/GZMB/E…	129	BP
GO:0005829	cytosol	153/411	4909/18675	5.61226e-07	8.50092e-06	6.86329e-06	UBE2C/TPX2/CDC20/BIRC5/KIF2C/CENPA/HJURP/KIF4A/RRM2/DLGAP5/NEK2/AURKB/CDCA5/KIF18B/CDKN3/CDC6/CCNA2/NCAPH/NUF2/NCAPG/CCNB2/CDCA8/CDK1/CCNB1/BUB1/NDC80/PLK1/KIF23/CENPF/CKAP2L/BUB1B/AURKA/SKA1/IGF2BP3/KIF11/SLC2A1/TK1/GTSE1/PRC1/ZWINT/DEPDC1B/TNNT1/ESPL1/HMMR/KPNA2/MAD2L1/CCNE1/IQGAP3/CDT1/ORC1/SPC25/KIF14/CDCA3/SAPCD2/CDCA2/UCHL1/PKMYT1/RACGAP1/CIP2A/GGH/ARHGAP11A/SPC24/SGO1/CDC25C/KIF15/CENPU/DT…	153	CC
GO:0042770	signal transduction in response to DNA damage	15/401	131/17910	2.46611e-07	8.99577e-06	7.78964e-06	FOXM1/CDK1/CCNB1/PLK1/AURKA/GTSE1/CDC25C/DTL/E2F1/CHEK1/BRCA1/E2F8/PMAIP1/E2F7/MUC1	15	BP
GO:1901992	positive regulation of mitotic cell cycle phase transition	12/401	82/17910	2.71559e-07	9.83245e-06	8.51414e-06	UBE2C/DLGAP5/CDCA5/CDC6/CDK1/CCNB1/ESPL1/CCNE1/CDT1/DTL/CDC7/FBXO5	12	BP
GO:0000079	regulation of cyclin-dependent protein serine/threonine kinase activity	12/401	83/17910	3.11124e-07	1.11822e-05	9.68289e-06	CDKN3/CDC6/CCNB1/PLK1/PKMYT1/CDC25C/CDC25A/CKS2/PSRC1/CKS1B/CDKN2A/BLM	12	BP
GO:0006334	nucleosome assembly	15/401	135/17910	3.66238e-07	1.30669e-05	1.1315e-05	CENPA/HJURP/CENPW/ASF1B/MCM2/CENPU/OIP5/CENPI/CENPM/KNL1/CENPK/CENPN/CENPH/CHAF1B/HMGB2	15	BP
GO:0010639	negative regulation of organelle organization	25/401	352/17910	4.09614e-07	1.45086e-05	1.25634e-05	CDC20/TOP2A/NEK2/AURKB/TRIP13/TTK/CCNB1/NDC80/PLK1/CENPF/ESPL1/MAD2L1/CDT1/MCM2/PFN2/CHEK1/HMGA1/BRCA1/STMN1/FBXO5/CCNF/PIF1/DLC1/CLU/LRRK2	25	BP
GO:0006275	regulation of DNA replication	13/401	102/17910	4.51047e-07	1.58613e-05	1.37347e-05	CDC6/CCNA2/CDK1/CDT1/DSCC1/E2F8/RFC4/TICRR/CDC7/E2F7/BLM/FBXO5/ESCO2	13	BP
GO:0044786	cell cycle DNA replication	10/401	57/17910	4.78134e-07	1.66937e-05	1.44555e-05	CDT1/RAD51/E2F8/RFC4/FEN1/POLE2/CDC7/E2F7/PRIM1/FBXO5	10	BP
GO:0051128	regulation of cellular component organization	88/401	2340/17910	4.88542e-07	1.69361e-05	1.46654e-05	UBE2C/TPX2/CDC20/TOP2A/ANLN/HJURP/DLGAP5/NEK2/AURKB/CDCA5/CDC6/TRIP13/TTK/MKI67/CCNB1/BUB1/NDC80/PLK1/CENPF/SPAG5/BUB1B/AURKA/SKA1/KIF11/ESPL1/NUSAP1/MAD2L1/SKA3/FGB/CDT1/KIF14/PKMYT1/MCM2/CDC25C/PFN2/E2F1/CENPE/CHEK1/ECT2/PLK4/HMGA1/GNG4/BRCA1/FOSL1/TACC3/COCH/CXCL10/FEN1/STIL/EIF4EBP1/STMN1/EZH2/POC1A/PMAIP1/PSRC1/MELTF/GAL/GREM1/KIF18A/GZMB/KIF20B/CDKN2A/TUBB2B/SEMA3A/SPHK1/FBXO5/KNTC1/RMI2/CC…	88	BP
GO:1904029	regulation of cyclin-dependent protein kinase activity	12/401	87/17910	5.25665e-07	1.80947e-05	1.56686e-05	CDKN3/CDC6/CCNB1/PLK1/PKMYT1/CDC25C/CDC25A/CKS2/PSRC1/CKS1B/CDKN2A/BLM	12	BP
GO:0032886	regulation of microtubule-based process	18/401	199/17910	5.70977e-07	1.9517e-05	1.69002e-05	TPX2/NEK2/PLK1/SPAG5/AURKA/SKA1/KIF11/SKA3/CHEK1/PLK4/BRCA1/TACC3/STIL/STMN1/POC1A/PSRC1/KIF18A/CCNF	18	BP
GO:0051233	spindle midzone	7/411	27/18675	1.44226e-06	2.12219e-05	1.71337e-05	AURKB/CDC6/PLK1/KIF14/RACGAP1/CENPE/KIF20B	7	CC
GO:0000022	mitotic spindle elongation	5/401	9/17910	6.42235e-07	2.165e-05	1.87472e-05	KIF4A/AURKB/KIF23/PRC1/RACGAP1	5	BP
GO:0006271	DNA strand elongation involved in DNA replication	5/401	9/17910	6.42235e-07	2.165e-05	1.87472e-05	GINS1/GINS2/RFC4/FEN1/GINS4	5	BP
GO:0005576	extracellular region	136/411	4295/18675	1.51837e-06	2.17211e-05	1.75367e-05	TPX2/KIF4A/CEP55/CDCA8/CDK1/KIF23/MMP12/SLC2A1/KIF20A/CTSV/FGB/RACGAP1/GGH/PFN2/CHEK1/ATAD2/PSAT1/GNG4/PLOD2/COL11A1/DSP/COCH/CXCL10/STMN1/SLC7A5/TXNRD1/LYPD3/MTHFD2/CDC7/LY6K/MELTF/KRT6A/GAL/GREM1/STC1/HILPDA/AKR1B10/CTHRC1/SLC16A1/TMPRSS11E/CXCL8/STC2/PFKP/SEMA3A/NMU/HMGB2/SNCG/KLK6/ORM1/JCHAIN/C3/APOD/HAS3/BMP3/LGALS4/SLC44A4/MUC1/SCGB2A1/DES/TSPAN8/PTGDS/SERPIND1/CLEC3B/ECRG4/IL33/LPL/ABO/ADA…	136	CC
GO:0140013	meiotic nuclear division	15/401	142/17910	7.06661e-07	2.36586e-05	2.04865e-05	CDC20/TOP2A/TRIP13/NCAPH/TTK/PLK1/AURKA/ASPM/ESPL1/SGO1/SGO2/CKS2/KIF18A/BRIP1/FBXO5	15	BP
GO:0044774	mitotic DNA integrity checkpoint	12/401	90/17910	7.64171e-07	2.541e-05	2.20031e-05	CDK1/CCNB1/AURKA/GTSE1/CDC25C/E2F1/CLSPN/E2F8/TICRR/E2F7/BLM/MUC1	12	BP
GO:0044428	nuclear part	148/411	4801/18675	1.9432e-06	2.70472e-05	2.18368e-05	MYBL2/UBE2C/TPX2/CDC20/BIRC5/TOP2A/ANLN/CENPA/HJURP/KIF4A/FOXM1/NEK2/AURKB/CDCA5/KIF18B/CDC6/CCNA2/CDCA8/MKI67/CDK1/CCNB1/BUB1/CDC45/NDC80/PLK1/KIF23/CENPF/EXO1/BUB1B/MCM10/AURKA/PIMREG/GTSE1/KIF20A/ZWINT/CENPW/UBE2T/RAD54L/KPNA2/MAD2L1/CCNE1/GINS1/RAD51AP1/CDT1/UHRF1/ORC1/ASF1B/SAPCD2/NEIL3/CDCA2/UCHL1/PKMYT1/RACGAP1/PCLAF/DSCC1/MCM2/MCM4/SPC24/SGO1/CDC25C/CENPU/DTL/E2F1/CLSPN/CENPE/GINS2/CHEK1/…	148	CC
GO:0034728	nucleosome organization	16/401	165/17910	9.63509e-07	3.18218e-05	2.75553e-05	CENPA/HJURP/CENPW/ASF1B/MCM2/CENPU/OIP5/CENPI/HMGA1/CENPM/KNL1/CENPK/CENPN/CENPH/CHAF1B/HMGB2	16	BP
GO:0090329	regulation of DNA-dependent DNA replication	9/401	48/17910	1.00116e-06	3.28433e-05	2.84397e-05	CDT1/DSCC1/E2F8/RFC4/TICRR/CDC7/E2F7/BLM/FBXO5	9	BP
GO:0051338	regulation of transferase activity	44/401	902/17910	1.03911e-06	3.38611e-05	2.93211e-05	UBE2C/TPX2/CDC20/NEK2/AURKB/CDKN3/CDC6/CDK1/CCNB1/PLK1/MAD2L1/IQGAP3/KIF14/UCHL1/PKMYT1/DSCC1/CDC25C/CLSPN/CENPE/UBE2S/ECT2/CDC25A/NCAPG2/RFC4/CXCL10/EZH2/CKS2/PSRC1/CKS1B/GREM1/CDKN2A/DBF4/BLM/FBXO5/PIF1/GPRC5C/PARM1/CXCL17/AGER/CLU/PPP1R1B/LRRK2/FOXA2/PLA2G1B	44	BP
GO:0051656	establishment of organelle localization	28/401	448/17910	1.09495e-06	3.52827e-05	3.05521e-05	KIF2C/CENPA/DLGAP5/CDCA5/KIFC1/CDCA8/CCNB1/NDC80/PLK1/KIF23/CENPF/SPAG5/FAM83D/ESPL1/NUSAP1/MAD2L1/CDT1/KIF14/SAPCD2/UCHL1/PFN2/CENPE/KIF1A/PSRC1/KIF18A/KIF3C/LRRK2/FOLR1	28	BP
GO:0043044	ATP-dependent chromatin remodeling	11/401	77/17910	1.09717e-06	3.52827e-05	3.05521e-05	CENPA/HJURP/CENPW/CENPU/OIP5/CENPI/CENPM/KNL1/CENPK/CENPN/CENPH	11	BP
GO:0051231	spindle elongation	5/401	10/17910	1.26084e-06	4.02811e-05	3.48803e-05	KIF4A/AURKB/KIF23/PRC1/RACGAP1	5	BP
GO:0043161	proteasome-mediated ubiquitin-dependent protein catabolic process	23/401	328/17910	1.49028e-06	4.73019e-05	4.09598e-05	UBE2C/CDC20/AURKB/PBK/CDK1/CCNB1/PLK1/BUB1B/AURKA/MAD2L1/KIF14/UCHL1/UBE2S/PTTG1/GCLC/FBXO5/SKP2/CCNF/ECRG4/IL33/SHH/CLU/LRRK2	23	BP
GO:1903046	meiotic cell cycle process	15/401	151/17910	1.55113e-06	4.89155e-05	4.2357e-05	CDC20/TOP2A/TRIP13/NCAPH/TTK/PLK1/AURKA/ASPM/ESPL1/SGO1/SGO2/CKS2/KIF18A/BRIP1/FBXO5	15	BP
GO:0019886	antigen processing and presentation of exogenous peptide antigen via MHC class II	12/401	97/17910	1.72751e-06	5.41287e-05	4.68713e-05	KIF2C/KIF4A/KIF23/KIF11/CTSV/RACGAP1/KIF15/CENPE/KIF18A/KIF3C/HLA-DQB2/CTSE	12	BP
GO:0040001	establishment of mitotic spindle localization	7/401	28/17910	2.11104e-06	6.57245e-05	5.69124e-05	CENPA/NDC80/PLK1/ESPL1/NUSAP1/MAD2L1/SAPCD2	7	BP
GO:0000076	DNA replication checkpoint	5/401	11/17910	2.26905e-06	7.01969e-05	6.07851e-05	CDC6/CDC45/CDT1/CLSPN/TICRR	5	BP
GO:0006338	chromatin remodeling	15/401	156/17910	2.3394e-06	7.19183e-05	6.22757e-05	CENPA/HJURP/CENPW/CENPU/CHEK1/OIP5/CENPI/HMGA1/CENPM/KNL1/CENPK/CENPN/HELLS/CDKN2A/CENPH	15	BP
GO:0002495	antigen processing and presentation of peptide antigen via MHC class II	12/401	100/17910	2.39648e-06	7.32124e-05	6.33963e-05	KIF2C/KIF4A/KIF23/KIF11/CTSV/RACGAP1/KIF15/CENPE/KIF18A/KIF3C/HLA-DQB2/CTSE	12	BP
GO:0002504	antigen processing and presentation of peptide or polysaccharide antigen via MHC class II	12/401	101/17910	2.66545e-06	8.09238e-05	7.00738e-05	KIF2C/KIF4A/KIF23/KIF11/CTSV/RACGAP1/KIF15/CENPE/KIF18A/KIF3C/HLA-DQB2/CTSE	12	BP
GO:0046605	regulation of centrosome cycle	9/401	54/17910	2.81953e-06	8.50733e-05	7.3667e-05	NEK2/AURKA/KIF11/CHEK1/PLK4/BRCA1/STIL/POC1A/CCNF	9	BP
GO:0051653	spindle localization	8/401	41/17910	2.94642e-06	8.83566e-05	7.651e-05	CENPA/NDC80/PLK1/ASPM/ESPL1/NUSAP1/MAD2L1/SAPCD2	8	BP
GO:0044773	mitotic DNA damage checkpoint	11/401	86/17910	3.35472e-06	9.99872e-05	8.65812e-05	CDK1/CCNB1/AURKA/GTSE1/CDC25C/E2F1/CLSPN/E2F8/E2F7/BLM/MUC1	11	BP
GO:0000796	condensin complex	4/411	7/18675	7.67837e-06	0.000101394	8.18612e-05	NCAPH/NCAPG/NCAPG2/NCAPD2	4	CC
GO:0097486	multivesicular body lumen	4/411	7/18675	7.67837e-06	0.000101394	8.18612e-05	CTSH/NAPSA/SFTPC/SFTPB	4	CC
GO:0007143	female meiotic nuclear division	7/401	30/17910	3.49201e-06	0.000102825	8.90386e-05	TOP2A/TRIP13/NCAPH/TTK/PLK1/AURKA/FBXO5	7	BP
GO:0031572	G2 DNA damage checkpoint	7/401	30/17910	3.49201e-06	0.000102825	8.90386e-05	CDK1/PLK1/DTL/CLSPN/CHEK1/BRCA1/BLM	7	BP
GO:0010369	chromocenter	5/411	14/18675	8.5636e-06	0.000110256	8.90163e-05	AURKB/CDCA8/OIP5/INCENP/ESCO2	5	CC
GO:0051988	regulation of attachment of spindle microtubules to kinetochore	5/401	12/17910	3.81832e-06	0.00011176	9.67756e-05	NEK2/CCNB1/SPAG5/RACGAP1/ECT2	5	BP
GO:0006977	DNA damage response, signal transduction by p53 class mediator resulting in cell cycle arrest	9/401	56/17910	3.86115e-06	0.000112341	9.72786e-05	CDK1/CCNB1/AURKA/GTSE1/CDC25C/E2F1/E2F8/E2F7/MUC1	9	BP
GO:0010997	anaphase-promoting complex binding	5/390	8/16967	3.30899e-07	0.000120944	0.000106759	CDC20/PLK1/CLSPN/UBE2S/FBXO5	5	MF
GO:0030330	DNA damage response, signal transduction by p53 class mediator	12/401	106/17910	4.45038e-06	0.000128502	0.000111273	FOXM1/CDK1/CCNB1/AURKA/GTSE1/CDC25C/E2F1/BRCA1/E2F8/PMAIP1/E2F7/MUC1	12	BP
GO:0072431	signal transduction involved in mitotic G1 DNA damage checkpoint	9/401	57/17910	4.49546e-06	0.000128502	0.000111273	CDK1/CCNB1/AURKA/GTSE1/CDC25C/E2F1/E2F8/E2F7/MUC1	9	BP
GO:1902400	intracellular signal transduction involved in G1 DNA damage checkpoint	9/401	57/17910	4.49546e-06	0.000128502	0.000111273	CDK1/CCNB1/AURKA/GTSE1/CDC25C/E2F1/E2F8/E2F7/MUC1	9	BP
GO:0051640	organelle localization	33/401	623/17910	4.59067e-06	0.000130461	0.000112969	KIF2C/CENPA/DLGAP5/NEK2/CDCA5/KIFC1/CDCA8/CDK1/CCNB1/NDC80/PLK1/KIF23/CENPF/SPAG5/AURKA/FAM83D/ASPM/ESPL1/NUSAP1/MAD2L1/CDT1/KIF14/SAPCD2/UCHL1/PFN2/CENPE/PLK4/KIF1A/PSRC1/KIF18A/KIF3C/LRRK2/FOLR1	33	BP
GO:0097149	centralspindlin complex	3/411	3/18675	1.05837e-05	0.000132941	0.000107331	KIF23/RACGAP1/ECT2	3	CC
GO:0019731	antibacterial humoral response	8/401	44/17910	5.15382e-06	0.000145618	0.000126094	FGB/JCHAIN/SPINK5/SLPI/DMBT1/PLA2G1B/SFTPD/PGC	8	BP
GO:0005524	ATP binding	63/390	1451/16967	6.17947e-07	0.000150573	0.000132913	UBE2C/TOP2A/KIF2C/MELK/KIF4A/NEK2/AURKB/KIF18B/CDC6/TRIP13/KIFC1/TTK/PBK/MKI67/CDK1/BUB1/PLK1/KIF23/BUB1B/AURKA/KIF11/TK1/KIF20A/UBE2T/RAD54L/ORC1/KIF14/PKMYT1/MCM2/MCM4/KIF15/CENPE/CHEK1/RECQL4/UBE2S/ATAD2/RAD51/PLK4/XRCC2/MCM6/RFC4/GCLC/ERCC6L/KIF1A/POLQ/CDC7/MCM7/HASPIN/UCK2/KIF18A/BRIP1/KIF20B/ABCC2/HELLS/KIF3C/BLM/SPHK1/PIF1/CDKL2/ROS1/ABCA3/LRRK2/ATP13A4	63	MF
GO:0000724	double-strand break repair via homologous recombination	12/401	108/17910	5.41694e-06	0.000152172	0.00013177	RAD54L/RAD51AP1/CHEK1/AUNIP/RAD51/XRCC2/BRCA1/FEN1/POLQ/PARPBP/TIMELESS/BLM	12	BP
GO:0045120	pronucleus	5/411	15/18675	1.26136e-05	0.000154667	0.000124872	CCNA2/CENPF/AURKA/SLC2A1/EZH2	5	CC
GO:0006302	double-strand break repair	17/401	211/17910	5.71938e-06	0.00015975	0.000138332	FOXM1/CDCA5/TRIP13/RAD54L/RAD51AP1/CHEK1/AUNIP/RAD51/XRCC2/BRCA1/FEN1/POLQ/PARPBP/TIMELESS/BRIP1/BLM/ESCO2	17	BP
GO:0032559	adenyl ribonucleotide binding	64/390	1502/16967	9.50068e-07	0.000162904	0.000143797	UBE2C/TOP2A/KIF2C/MELK/KIF4A/NEK2/AURKB/KIF18B/CDC6/TRIP13/KIFC1/TTK/PBK/MKI67/CDK1/BUB1/PLK1/KIF23/BUB1B/AURKA/KIF11/TK1/KIF20A/UBE2T/RAD54L/ORC1/KIF14/PKMYT1/MCM2/MCM4/KIF15/CENPE/CHEK1/RECQL4/UBE2S/ATAD2/RAD51/PLK4/XRCC2/MCM6/RFC4/GCLC/ERCC6L/KIF1A/POLQ/CDC7/MCM7/POPDC3/HASPIN/UCK2/KIF18A/BRIP1/KIF20B/ABCC2/HELLS/KIF3C/BLM/SPHK1/PIF1/CDKL2/ROS1/ABCA3/LRRK2/ATP13A4	64	MF
GO:0030554	adenyl nucleotide binding	64/390	1509/16967	1.11425e-06	0.000162904	0.000143797	UBE2C/TOP2A/KIF2C/MELK/KIF4A/NEK2/AURKB/KIF18B/CDC6/TRIP13/KIFC1/TTK/PBK/MKI67/CDK1/BUB1/PLK1/KIF23/BUB1B/AURKA/KIF11/TK1/KIF20A/UBE2T/RAD54L/ORC1/KIF14/PKMYT1/MCM2/MCM4/KIF15/CENPE/CHEK1/RECQL4/UBE2S/ATAD2/RAD51/PLK4/XRCC2/MCM6/RFC4/GCLC/ERCC6L/KIF1A/POLQ/CDC7/MCM7/POPDC3/HASPIN/UCK2/KIF18A/BRIP1/KIF20B/ABCC2/HELLS/KIF3C/BLM/SPHK1/PIF1/CDKL2/ROS1/ABCA3/LRRK2/ATP13A4	64	MF
GO:0010498	proteasomal protein catabolic process	24/401	382/17910	5.93963e-06	0.000163908	0.000141932	UBE2C/CDC20/AURKB/PBK/CDK1/CCNB1/PLK1/BUB1B/AURKA/MAD2L1/KIF14/UCHL1/UBE2S/PTTG1/GCLC/PMAIP1/FBXO5/SKP2/CCNF/ECRG4/IL33/SHH/CLU/LRRK2	24	BP
GO:0000725	recombinational repair	12/401	109/17910	5.96598e-06	0.000163908	0.000141932	RAD54L/RAD51AP1/CHEK1/AUNIP/RAD51/XRCC2/BRCA1/FEN1/POLQ/PARPBP/TIMELESS/BLM	12	BP
GO:0072413	signal transduction involved in mitotic cell cycle checkpoint	9/401	59/17910	6.0359e-06	0.000163908	0.000141932	CDK1/CCNB1/AURKA/GTSE1/CDC25C/E2F1/E2F8/E2F7/MUC1	9	BP
GO:1902402	signal transduction involved in mitotic DNA damage checkpoint	9/401	59/17910	6.0359e-06	0.000163908	0.000141932	CDK1/CCNB1/AURKA/GTSE1/CDC25C/E2F1/E2F8/E2F7/MUC1	9	BP
GO:1902403	signal transduction involved in mitotic DNA integrity checkpoint	9/401	59/17910	6.0359e-06	0.000163908	0.000141932	CDK1/CCNB1/AURKA/GTSE1/CDC25C/E2F1/E2F8/E2F7/MUC1	9	BP
GO:1904666	regulation of ubiquitin protein ligase activity	6/401	22/17910	6.68115e-06	0.000180428	0.000156237	UBE2C/CDC20/PLK1/MAD2L1/UBE2S/FBXO5	6	BP
GO:0008144	drug binding	68/390	1658/16967	1.60127e-06	0.000195088	0.000172207	UBE2C/TOP2A/KIF2C/MELK/KIF4A/NEK2/AURKB/KIF18B/CDC6/TRIP13/KIFC1/TTK/PBK/MKI67/CDK1/BUB1/PLK1/KIF23/BUB1B/AURKA/KIF11/TK1/KIF20A/UBE2T/RAD54L/ORC1/KIF14/PKMYT1/MCM2/MCM4/KIF15/CENPE/CHEK1/RECQL4/UBE2S/ATAD2/RAD51/PLK4/TYMS/XRCC2/MCM6/RFC4/GCLC/ERCC6L/KIF1A/POLQ/CDC7/MCM7/HASPIN/UCK2/KIF18A/BRIP1/KIF20B/ABCC2/HELLS/KIF3C/BLM/HMGB2/SPHK1/PIF1/CDKL2/ROS1/ABCA3/LRRK2/ATP13A4/SCGB1A1/FOLR1/CYP4B1	68	MF
GO:0051256	mitotic spindle midzone assembly	4/401	7/17910	8.21469e-06	0.000220623	0.000191043	KIF4A/AURKB/KIF23/RACGAP1	4	BP
GO:0000785	chromatin	27/411	500/18675	1.84336e-05	0.000220774	0.000178244	CENPA/CDCA5/PLK1/CENPF/RAD51AP1/UHRF1/ASF1B/DSCC1/MCM2/E2F1/CHEK1/OIP5/RAD51/HMGA1/EME1/EZH2/PARPBP/MCM7/TIMELESS/HELLS/INCENP/CDKN2A/CHAF1B/HMGB2/WDR76/ESCO2/MUC1	27	CC
GO:1902806	regulation of cell cycle G1/S phase transition	16/401	195/17910	8.53595e-06	0.000227998	0.000197429	CDC6/CDK1/CCNB1/AURKA/FAM83D/GTSE1/CCNE1/KIF14/CDC25C/E2F1/E2F8/EZH2/E2F7/CDKN2A/MUC1/SUSD2	16	BP
GO:0045840	positive regulation of mitotic nuclear division	8/401	48/17910	1.01478e-05	0.000269579	0.000233435	UBE2C/DLGAP5/CDCA5/AURKA/ESPL1/NUSAP1/CDT1/SPHK1	8	BP
GO:0006310	DNA recombination	18/401	244/17910	1.03878e-05	0.000274463	0.000237664	TRIP13/EXO1/RAD54L/KPNA2/RAD51AP1/CHEK1/AUNIP/RAD51/XRCC2/BRCA1/FEN1/POLQ/PARPBP/TIMELESS/BRIP1/BLM/HMGB2/PIF1	18	BP
GO:0031571	mitotic G1 DNA damage checkpoint	9/401	63/17910	1.0506e-05	0.000274618	0.000237798	CDK1/CCNB1/AURKA/GTSE1/CDC25C/E2F1/E2F8/E2F7/MUC1	9	BP
GO:0044819	mitotic G1/S transition checkpoint	9/401	63/17910	1.0506e-05	0.000274618	0.000237798	CDK1/CCNB1/AURKA/GTSE1/CDC25C/E2F1/E2F8/E2F7/MUC1	9	BP
GO:0051984	positive regulation of chromosome segregation	6/401	24/17910	1.16035e-05	0.00030169	0.00026124	DLGAP5/CDC6/CCNB1/ESPL1/CDT1/FEN1	6	BP
GO:0044783	G1 DNA damage checkpoint	9/401	64/17910	1.19865e-05	0.00031	0.000268436	CDK1/CCNB1/AURKA/GTSE1/CDC25C/E2F1/E2F8/E2F7/MUC1	9	BP
GO:0031906	late endosome lumen	4/411	9/18675	2.66888e-05	0.00031238	0.000252203	CTSH/NAPSA/SFTPC/SFTPB	4	CC
GO:0051293	establishment of spindle localization	7/401	36/17910	1.27526e-05	0.000328078	0.00028409	CENPA/NDC80/PLK1/ESPL1/NUSAP1/MAD2L1/SAPCD2	7	BP
GO:0007076	mitotic chromosome condensation	5/401	15/17910	1.3695e-05	0.000350477	0.000303487	CDCA5/NCAPH/NCAPG/NUSAP1/NCAPD2	5	BP
GO:0071158	positive regulation of cell cycle arrest	10/401	82/17910	1.44036e-05	0.000366692	0.000317527	CDK1/CCNB1/AURKA/GTSE1/CDC25C/E2F1/BRCA1/E2F8/E2F7/MUC1	10	BP
GO:0032467	positive regulation of cytokinesis	7/401	37/17910	1.54278e-05	0.000388717	0.000336599	AURKB/CDC6/KIF23/KIF14/RACGAP1/ECT2/KIF20B	7	BP
GO:0032506	cytokinetic process	7/401	37/17910	1.54278e-05	0.000388717	0.000336599	CEP55/AURKB/KIF23/KIF20A/RACGAP1/ECT2/KIF20B	7	BP
GO:0006508	proteolysis	63/401	1645/17910	1.64853e-05	0.000413231	0.000357826	UBE2C/CDC20/BIRC5/AURKB/CCNA2/PBK/CDK1/CCNB1/PLK1/MMP12/BUB1B/AURKA/MAGEA3/ESPL1/MAD2L1/FGB/UHRF1/KIF14/UCHL1/GGH/DTL/CLSPN/UBE2S/PTTG1/CDC25A/BRCA1/GCLC/EGLN3/PMAIP1/MELTF/GZMB/TMPRSS11E/FBXO5/SKP2/CCNF/KLK6/C3/CLEC3B/ECRG4/IL33/DLC1/ADAMTS8/WFDC2/CPB2/SHH/MMP28/CPAMD8/AQP1/SPINK5/SPINK1/AGER/CLU/CTSH/PCSK2/TMPRSS2/LRRK2/SLPI/GGT6/CTSE/C7/C4BPA/GGTLC1/NAPSA	63	BP
GO:0048523	negative regulation of cellular process	140/401	4580/17910	1.67394e-05	0.00041746	0.000361488	CDC20/BIRC5/TOP2A/RRM2/FOXM1/NEK2/AURKB/CDKN3/CDC6/TRIP13/TTK/PBK/CDK1/CCNB1/BUB1/DEPDC1/CDC45/NDC80/PLK1/CENPF/MMP12/BUB1B/AURKA/IGF2BP3/GTSE1/ASPM/ZWINT/MAGEA3/ESPL1/MAD2L1/CCNE1/FGB/CDT1/UHRF1/KIF14/UCHL1/PKMYT1/MCM2/PRAME/CDC25C/PFN2/DTL/E2F1/CLSPN/CHEK1/AUNIP/RAD51/TYMS/HMGA1/PTTG1/GNG4/XRCC2/NCAPG2/BRCA1/FOSL1/ORC6/E2F8/DDIAS/CXCL10/GCLC/STIL/APOBEC3B/EIF4EBP1/STMN1/EZH2/POLQ/IGF2BP2/KNL1/T…	140	BP
GO:0000792	heterochromatin	9/411	75/18675	3.86143e-05	0.000441919	0.000356787	CENPA/UHRF1/HMGA1/EME1/HELLS/INCENP/CDKN2A/WDR76/ESCO2	9	CC
GO:0043142	single-stranded DNA-dependent ATPase activity	5/390	12/16967	4.33646e-06	0.000452851	0.000399737	DSCC1/RAD51/RFC4/POLQ/PIF1	5	MF
GO:0032133	chromosome passenger complex	3/411	4/18675	4.1641e-05	0.000458208	0.000369938	BIRC5/AURKB/CDCA8	3	CC
GO:0000781	chromosome, telomeric region	13/411	156/18675	4.25662e-05	0.000458208	0.000369938	CDK1/ORC1/MCM2/MCM4/CHEK1/RECQL4/RAD51/MCM6/FEN1/EZH2/MCM7/BLM/PIF1	13	CC
GO:0045334	clathrin-coated endocytic vesicle	8/411	59/18675	4.27067e-05	0.000458208	0.000369938	HLA-DQB2/SFTA3/CD207/SFTPD/SFTPA2/SFTPA1/SFTPC/SFTPB	8	CC
GO:0016572	histone phosphorylation	7/401	38/17910	1.85504e-05	0.000460276	0.000398563	AURKB/CCNA2/CDK1/CCNB1/AURKA/CHEK1/HASPIN	7	BP
GO:0004003	ATP-dependent DNA helicase activity	7/390	31/16967	5.24533e-06	0.000479292	0.000423078	MCM4/RECQL4/MCM6/MCM7/BRIP1/BLM/PIF1	7	MF
GO:0022616	DNA strand elongation	5/401	16/17910	1.95547e-05	0.00048134	0.000416804	GINS1/GINS2/RFC4/FEN1/GINS4	5	BP
GO:0051347	positive regulation of transferase activity	31/401	609/17910	1.95963e-05	0.00048134	0.000416804	UBE2C/TPX2/CDC20/NEK2/AURKB/CDC6/CDK1/CCNB1/PLK1/IQGAP3/KIF14/DSCC1/CLSPN/CENPE/UBE2S/ECT2/NCAPG2/RFC4/EZH2/CKS2/PSRC1/CKS1B/GREM1/DBF4/GPRC5C/PARM1/CXCL17/AGER/CLU/LRRK2/PLA2G1B	31	BP
GO:0005615	extracellular space	98/411	3051/18675	4.69191e-05	0.000493129	0.000398132	CDK1/MMP12/SLC2A1/FGB/RACGAP1/GGH/PFN2/CHEK1/ATAD2/PSAT1/GNG4/PLOD2/DSP/STMN1/SLC7A5/TXNRD1/LYPD3/MTHFD2/MELTF/KRT6A/GAL/GREM1/STC1/HILPDA/CTHRC1/SLC16A1/STC2/PFKP/HMGB2/SNCG/KLK6/ORM1/JCHAIN/C3/APOD/BMP3/LGALS4/SLC44A4/MUC1/SCGB2A1/DES/TSPAN8/PTGDS/SERPIND1/CLEC3B/ECRG4/IL33/LPL/GPRC5C/WFDC2/CXCL14/CPB2/SHH/B3GNT8/FCGBP/CPAMD8/AQP1/MGP/SPINK1/IGHD/CXCL17/CLU/HPGD/CTSH/CRTAC1/ABCA3/PCSK2/TMPRSS2/…	98	CC
GO:0008017	microtubule binding	15/390	166/16967	6.88613e-06	0.000559307	0.000493707	BIRC5/KIF2C/PLK1/KIF23/SPAG5/FAM83D/SKA1/PRC1/KIF14/RACGAP1/CENPE/PSRC1/KIF18A/KIF20B/LRRK2	15	MF
GO:0016887	ATPase activity	20/390	280/16967	7.98016e-06	0.00058335	0.00051493	TOP2A/KIF14/DSCC1/MCM4/PFN2/RECQL4/ATAD2/RAD51/XRCC2/MCM6/RFC4/ERCC6L/POLQ/MCM7/KIF18A/BRIP1/KIF20B/BLM/PIF1/ATP13A4	20	MF
GO:0140097	catalytic activity, acting on DNA	14/390	152/16967	1.11786e-05	0.000691599	0.000610484	TOP2A/EXO1/RAD54L/NEIL3/MCM4/RECQL4/MCM6/ERCC6L/FEN1/POLQ/MCM7/BRIP1/BLM/PIF1	14	MF
GO:0017111	nucleoside-triphosphatase activity	33/390	635/16967	1.15397e-05	0.000691599	0.000610484	TOP2A/KIF18B/KIFC1/RAD54L/KIF14/DSCC1/MCM2/MCM4/KIF15/PFN2/CENPE/RECQL4/ATAD2/RAD51/GNG4/XRCC2/MCM6/RFC4/ERCC6L/KIF1A/POLQ/MCM7/KIF18A/BRIP1/KIF20B/HELLS/TUBB2B/KIF3C/BLM/PIF1/RAP1GAP/LRRK2/ATP13A4	33	MF
GO:0042623	ATPase activity, coupled	17/390	218/16967	1.22993e-05	0.000691599	0.000610484	TOP2A/KIF14/DSCC1/MCM4/RECQL4/RAD51/XRCC2/MCM6/RFC4/ERCC6L/POLQ/MCM7/KIF18A/BRIP1/KIF20B/BLM/PIF1	17	MF
GO:0042555	MCM complex	4/411	11/18675	6.74918e-05	0.000695165	0.000561247	MCM2/MCM4/MCM6/MCM7	4	CC
GO:0043129	surfactant homeostasis	4/401	9/17910	2.85357e-05	0.000697412	0.000603905	CTSH/ADGRF5/SFTPD/NAPSA	4	BP
GO:0097367	carbohydrate derivative binding	77/390	2090/16967	1.60174e-05	0.000720798	0.000636258	UBE2C/TOP2A/KIF2C/MELK/KIF4A/NEK2/AURKB/KIF18B/CDC6/TRIP13/KIFC1/TTK/PBK/MKI67/CDK1/BUB1/PLK1/KIF23/BUB1B/AURKA/KIF11/TK1/KIF20A/UBE2T/RAD54L/HMMR/ORC1/KIF14/PKMYT1/MCM2/MCM4/KIF15/CENPE/CHEK1/RECQL4/UBE2S/ATAD2/RAD51/PLK4/XRCC2/COL11A1/MCM6/RFC4/CXCL10/GCLC/ERCC6L/KIF1A/POLQ/CDC7/MCM7/POPDC3/HASPIN/UCK2/KIF18A/BRIP1/KIF20B/ABCC2/HELLS/KIF3C/BLM/SPHK1/PIF1/JCHAIN/CDKL2/LGALS4/SERPIND1/CLEC3B/LPL/…	77	MF
GO:0016462	pyrophosphatase activity	34/390	675/16967	1.62582e-05	0.000720798	0.000636258	TOP2A/KIF18B/KIFC1/RAD54L/KIF14/DSCC1/MCM2/MCM4/KIF15/PFN2/CENPE/RECQL4/ATAD2/RAD51/GNG4/XRCC2/MCM6/RFC4/ERCC6L/KIF1A/POLQ/MCM7/KIF18A/BRIP1/KIF20B/HELLS/TUBB2B/KIF3C/BLM/PIF1/RAP1GAP/LRRK2/ATP13A4/ALPL	34	MF
GO:0016817	hydrolase activity, acting on acid anhydrides	34/390	676/16967	1.67628e-05	0.000720798	0.000636258	TOP2A/KIF18B/KIFC1/RAD54L/KIF14/DSCC1/MCM2/MCM4/KIF15/PFN2/CENPE/RECQL4/ATAD2/RAD51/GNG4/XRCC2/MCM6/RFC4/ERCC6L/KIF1A/POLQ/MCM7/KIF18A/BRIP1/KIF20B/HELLS/TUBB2B/KIF3C/BLM/PIF1/RAP1GAP/LRRK2/ATP13A4/ALPL	34	MF
GO:0016818	hydrolase activity, acting on acid anhydrides, in phosphorus-containing anhydrides	34/390	676/16967	1.67628e-05	0.000720798	0.000636258	TOP2A/KIF18B/KIFC1/RAD54L/KIF14/DSCC1/MCM2/MCM4/KIF15/PFN2/CENPE/RECQL4/ATAD2/RAD51/GNG4/XRCC2/MCM6/RFC4/ERCC6L/KIF1A/POLQ/MCM7/KIF18A/BRIP1/KIF20B/HELLS/TUBB2B/KIF3C/BLM/PIF1/RAP1GAP/LRRK2/ATP13A4/ALPL	34	MF
GO:0071156	regulation of cell cycle arrest	11/401	108/17910	3.04787e-05	0.000741194	0.000641817	FOXM1/CDK1/CCNB1/AURKA/GTSE1/CDC25C/E2F1/BRCA1/E2F8/E2F7/MUC1	11	BP
GO:0070317	negative regulation of G0 to G1 transition	7/401	41/17910	3.11899e-05	0.000754734	0.000653542	RRM2/E2F1/CHEK1/RAD51/BRCA1/EZH2/CDC7	7	BP
GO:0099513	polymeric cytoskeletal fiber	30/411	635/18675	7.73512e-05	0.000781095	0.000630624	TPX2/KIF2C/KIF4A/NEK2/KIF18B/CDK1/PLK1/SPAG5/AURKA/SKA1/KIF11/GTSE1/ASPM/PRC1/SKA3/KIF14/RACGAP1/CENPE/LMNB1/DSP/STMN1/PSRC1/KRT6A/KIF18A/INCENP/TUBB2B/LMNB2/KNTC1/DES/SCTR	30	CC
GO:1902807	negative regulation of cell cycle G1/S phase transition	12/401	130/17910	3.59994e-05	0.000866823	0.000750602	CDK1/CCNB1/AURKA/GTSE1/CDC25C/E2F1/E2F8/EZH2/E2F7/CDKN2A/MUC1/SUSD2	12	BP
GO:0006325	chromatin organization	34/401	722/17910	3.81829e-05	0.000914892	0.000792226	CENPA/HJURP/AURKB/CCNA2/MKI67/CDK1/CCNB1/AURKA/CENPW/UHRF1/ASF1B/MCM2/CENPU/CHEK1/OIP5/ATAD2/CENPI/HMGA1/BRCA1/CENPM/EZH2/KNL1/CENPK/HASPIN/CENPN/HELLS/CDKN2A/CENPH/CHAF1B/HMGB2/MUC1/PRDM16/LRRK2/FOXA2	34	BP
GO:0015631	tubulin binding	18/390	252/16967	2.26135e-05	0.000918361	0.000810649	BIRC5/KIF2C/PLK1/KIF23/SPAG5/FAM83D/SKA1/PRC1/KIF14/RACGAP1/CENPE/BRCA1/STMN1/PSRC1/KIF18A/KIF20B/TPPP3/LRRK2	18	MF
GO:0097208	alveolar lamellar body	3/411	5/18675	0.000102398	0.00101414	0.000818771	CTSH/ABCA3/NAPSA	3	CC
GO:0000912	assembly of actomyosin apparatus involved in cytokinesis	3/401	4/17910	4.38251e-05	0.00103989	0.000900463	KIF23/RACGAP1/ECT2	3	BP
GO:0000915	actomyosin contractile ring assembly	3/401	4/17910	4.38251e-05	0.00103989	0.000900463	KIF23/RACGAP1/ECT2	3	BP
GO:2000045	regulation of G1/S transition of mitotic cell cycle	14/401	177/17910	4.65789e-05	0.00109264	0.000946144	CDC6/CDK1/CCNB1/AURKA/GTSE1/CCNE1/KIF14/CDC25C/E2F1/E2F8/EZH2/E2F7/CDKN2A/MUC1	14	BP
GO:0051255	spindle midzone assembly	4/401	10/17910	4.67189e-05	0.00109264	0.000946144	KIF4A/AURKB/KIF23/RACGAP1	4	BP
GO:0051315	attachment of mitotic spindle microtubules to kinetochore	4/401	10/17910	4.67189e-05	0.00109264	0.000946144	KIF2C/NDC80/CDT1/CENPE	4	BP
GO:0070925	organelle assembly	33/401	699/17910	4.73814e-05	0.00110286	0.00095499	MYBL2/TPX2/CDC20/ANLN/CENPA/KIF4A/NEK2/AURKB/KIFC1/CDK1/PLK1/KIF23/CENPF/SPAG5/AURKA/KIF11/ASPM/CENPW/RACGAP1/CENPE/PLK4/BRCA1/STIL/POC1A/KNL1/CENPK/WDR62/CENPN/CENPH/KIF3C/FBXO5/CFAP221/LRRK2	33	BP
GO:0006890	retrograde vesicle-mediated transport, Golgi to ER	9/401	76/17910	4.89548e-05	0.00113408	0.000982026	KIF2C/KIF4A/KIF23/KIF11/RACGAP1/KIF15/CENPE/KIF18A/KIF3C	9	BP
GO:0015250	water channel activity	4/390	9/16967	3.161e-05	0.00121615	0.00107352	AQP1/AQP3/AQP4/AQP5	4	MF
GO:0051129	negative regulation of cellular component organization	32/401	673/17910	5.40164e-05	0.00124544	0.00107845	CDC20/TOP2A/NEK2/AURKB/TRIP13/TTK/CCNB1/NDC80/PLK1/CENPF/ESPL1/MAD2L1/CDT1/KIF14/MCM2/PFN2/CHEK1/HMGA1/BRCA1/CXCL10/EIF4EBP1/STMN1/MELTF/SEMA3A/FBXO5/CCNF/PIF1/APOD/DLC1/CLU/RAP1GAP/LRRK2	32	BP
GO:0051785	positive regulation of nuclear division	8/401	60/17910	5.44461e-05	0.00124945	0.00108193	UBE2C/DLGAP5/CDCA5/AURKA/ESPL1/NUSAP1/CDT1/SPHK1	8	BP
GO:0070316	regulation of G0 to G1 transition	7/401	45/17910	5.82915e-05	0.00133144	0.00115293	RRM2/E2F1/CHEK1/RAD51/BRCA1/EZH2/CDC7	7	BP
GO:1902750	negative regulation of cell cycle G2/M phase transition	10/401	97/17910	6.28865e-05	0.00142972	0.00123802	AURKB/CDK1/PLK1/AURKA/DTL/CLSPN/CHEK1/BRCA1/TICRR/BLM	10	BP
GO:0007050	cell cycle arrest	16/401	231/17910	6.83749e-05	0.0015473	0.00133984	FOXM1/CDKN3/CDK1/CCNB1/AURKA/GTSE1/CDC25C/E2F1/BRCA1/E2F8/DDIAS/E2F7/CXCL8/KIF20B/CDKN2A/MUC1	16	BP
GO:0003678	DNA helicase activity	7/390	42/16967	4.32869e-05	0.00158214	0.00139657	MCM4/RECQL4/MCM6/MCM7/BRIP1/BLM/PIF1	7	MF
GO:0007100	mitotic centrosome separation	4/401	11/17910	7.21189e-05	0.00160967	0.00139385	NEK2/AURKA/KIF11/CHEK1	4	BP
GO:0048875	chemical homeostasis within a tissue	4/401	11/17910	7.21189e-05	0.00160967	0.00139385	CTSH/ADGRF5/SFTPD/NAPSA	4	BP
GO:2000105	positive regulation of DNA-dependent DNA replication	4/401	11/17910	7.21189e-05	0.00160967	0.00139385	CDT1/E2F8/CDC7/E2F7	4	BP
GO:0033260	nuclear DNA replication	7/401	47/17910	7.7738e-05	0.00171938	0.00148885	CDT1/RAD51/RFC4/FEN1/POLE2/CDC7/PRIM1	7	BP
GO:0045023	G0 to G1 transition	7/401	47/17910	7.7738e-05	0.00171938	0.00148885	RRM2/E2F1/CHEK1/RAD51/BRCA1/EZH2/CDC7	7	BP
GO:0014070	response to organic cyclic compound	38/401	878/17910	8.1495e-05	0.00178889	0.00154904	CCNA2/CDK1/CCNB1/CTSV/CCNE1/RAD51/TYMS/BRCA1/FOSL1/CXCL10/GCLC/EIF4EBP1/EZH2/PMAIP1/KIF18A/STC1/SLC16A1/ABCC2/STC2/BLM/HMGB2/SKP2/GJB2/SCGB2A1/PLA2G4F/AQP1/KCNQ1/DUOX1/LMO3/CLU/HPGD/ABCA3/PPP1R1B/LRRK2/AQP3/ALPL/SCGB1A1/FOLR1	38	BP
GO:0042127	regulation of cell proliferation	61/401	1664/17910	8.16126e-05	0.00178889	0.00154904	CDC20/BIRC5/FOXM1/CDKN3/CDC6/CCNA2/TTK/CDK1/CCNB1/MMP12/ASPM/PRC1/IQGAP3/UHRF1/KIF14/SAPCD2/CIP2A/PRAME/E2F1/SHCBP1/HMGA1/BRCA1/FOSL1/SERPINB5/CXCL10/EZH2/EGLN3/CDC7/KRT6A/GAL/GREM1/HILPDA/BRIP1/CTHRC1/E2F7/CXCL8/KIF20B/CDKN2A/HMGB2/SPHK1/FBXO5/SKP2/APOD/DLC1/ADAMTS8/CPB2/SHH/AQP1/AGER/CLU/HPGD/ATOH8/CTSH/ELN/LRRK2/VEGFD/ALOX15B/PLA2G1B/SFTPD/SCGB1A1/SCGB3A1	61	BP
GO:0005372	water transmembrane transporter activity	4/390	10/16967	5.17278e-05	0.00180062	0.00158943	AQP1/AQP3/AQP4/AQP5	4	MF
GO:0007276	gamete generation	31/401	658/17910	8.37084e-05	0.00182664	0.00158173	TOP2A/TRIP13/NCAPH/KIFC1/TTK/CCNB1/PLK1/AURKA/ASPM/CTSV/ASF1B/RACGAP1/CIP2A/CDC25C/E2F1/RPL39L/PTTG1/FOSL1/POC1A/KNL1/TESMIN/KIF18A/BRIP1/HMGB2/FBXO5/TSPAN8/WFDC2/SPINK1/HPGD/ROS1/LRRK2	31	BP
GO:0000800	lateral element	4/411	14/18675	0.000194259	0.00188761	0.00152398	RAD51/BRCA1/INCENP/BLM	4	CC
GO:0097431	mitotic spindle pole	5/411	26/18675	0.000226292	0.00215816	0.00174241	SPAG5/AURKA/FAM83D/ASPM/KIF20B	5	CC
GO:0003684	damaged DNA binding	8/390	60/16967	6.52873e-05	0.00216932	0.00191489	NEIL3/RECQL4/AUNIP/BRCA1/FEN1/POLQ/BLM/HMGB2	8	MF
GO:0032268	regulation of cellular protein metabolic process	82/401	2452/17910	0.000104107	0.00226166	0.00195842	UBE2C/TPX2/CDC20/BIRC5/FOXM1/CDKN3/CDC6/TTK/PBK/CDK1/CCNB1/PLK1/AURKA/FAM83D/IGF2BP3/MAGEA3/MAD2L1/FGB/IQGAP3/UHRF1/KIF14/CDCA2/UCHL1/PKMYT1/CDC25C/PFN2/CLSPN/CENPE/CHEK1/UBE2S/ECT2/TYMS/PTTG1/CDC25A/NCAPG2/BRCA1/FANCI/CXCL10/GCLC/EIF4EBP1/EZH2/CKS2/IGF2BP2/EGLN3/PMAIP1/PSRC1/CKS1B/MELTF/GREM1/CDKN2A/DBF4/SEMA3A/BLM/SPHK1/FBXO5/SKP2/C3/MUC1/CLEC3B/IL33/DLC1/GPRC5C/WFDC2/CPB2/SHH/KLF15/CPAMD8/AQP1…	82	BP
GO:0000212	meiotic spindle organization	4/401	12/17910	0.000106269	0.00226831	0.00196418	AURKA/ASPM/ESPL1/FBXO5	4	BP
GO:0007077	mitotic nuclear envelope disassembly	4/401	12/17910	0.000106269	0.00226831	0.00196418	CCNB2/CDK1/CCNB1/PLK1	4	BP
GO:0051299	centrosome separation	4/401	12/17910	0.000106269	0.00226831	0.00196418	NEK2/AURKA/KIF11/CHEK1	4	BP
GO:1904668	positive regulation of ubiquitin protein ligase activity	4/401	12/17910	0.000106269	0.00226831	0.00196418	UBE2C/CDC20/PLK1/UBE2S	4	BP
GO:0044837	actomyosin contractile ring organization	3/401	5/17910	0.000107738	0.00228731	0.00198063	KIF23/RACGAP1/ECT2	3	BP
GO:0051781	positive regulation of cell division	9/401	84/17910	0.000108095	0.00228731	0.00198063	AURKB/CDC6/KIF23/KIF14/RACGAP1/ECT2/KIF20B/SHH/VEGFD	9	BP
GO:2000134	negative regulation of G1/S transition of mitotic cell cycle	11/401	124/17910	0.000108613	0.00228836	0.00198155	CDK1/CCNB1/AURKA/GTSE1/CDC25C/E2F1/E2F8/EZH2/E2F7/CDKN2A/MUC1	11	BP
GO:0071897	DNA biosynthetic process	14/401	192/17910	0.000112133	0.0023524	0.00203699	NEK2/AURKB/CENPF/TK1/PCLAF/DSCC1/DTL/TYMS/RFC4/POLQ/GREM1/SPHK1/PIF1/PARM1	14	BP
GO:0099512	supramolecular fiber	35/411	845/18675	0.00026305	0.0024631	0.00198861	TPX2/KIF2C/KIF4A/NEK2/KIF18B/CDK1/PLK1/SPAG5/AURKA/SKA1/KIF11/SLC2A1/GTSE1/ASPM/PRC1/TNNT1/SKA3/KIF14/RACGAP1/CENPE/LMNB1/COL11A1/DSP/STMN1/PSRC1/KRT6A/KIF18A/INCENP/TUBB2B/LMNB2/KNTC1/DES/ELN/MFAP4/SCTR	35	CC
GO:0000166	nucleotide binding	72/390	2012/16967	8.21758e-05	0.00246336	0.00217444	UBE2C/TOP2A/KIF2C/MELK/KIF4A/NEK2/AURKB/KIF18B/CDC6/TRIP13/KIFC1/TTK/PBK/MKI67/CDK1/BUB1/PLK1/KIF23/BUB1B/AURKA/KIF11/TK1/KIF20A/UBE2T/RAD54L/UHRF1/ORC1/KIF14/PKMYT1/MCM2/MCM4/KIF15/CENPE/CHEK1/RECQL4/UBE2S/ATAD2/RAD51/PLK4/TYMS/XRCC2/MCM6/RFC4/GCLC/ERCC6L/TXNRD1/KIF1A/POLQ/CDC7/MCM7/POPDC3/HASPIN/UCK2/KIF18A/BRIP1/KIF20B/ABCC2/HELLS/KIF3C/BLM/SPHK1/PIF1/CDKL2/ABO/DUOX1/HPGD/ROS1/FMO5/ABCA3/LRRK2…	72	MF
GO:1901265	nucleoside phosphate binding	72/390	2013/16967	8.34726e-05	0.00246336	0.00217444	UBE2C/TOP2A/KIF2C/MELK/KIF4A/NEK2/AURKB/KIF18B/CDC6/TRIP13/KIFC1/TTK/PBK/MKI67/CDK1/BUB1/PLK1/KIF23/BUB1B/AURKA/KIF11/TK1/KIF20A/UBE2T/RAD54L/UHRF1/ORC1/KIF14/PKMYT1/MCM2/MCM4/KIF15/CENPE/CHEK1/RECQL4/UBE2S/ATAD2/RAD51/PLK4/TYMS/XRCC2/MCM6/RFC4/GCLC/ERCC6L/TXNRD1/KIF1A/POLQ/CDC7/MCM7/POPDC3/HASPIN/UCK2/KIF18A/BRIP1/KIF20B/ABCC2/HELLS/KIF3C/BLM/SPHK1/PIF1/CDKL2/ABO/DUOX1/HPGD/ROS1/FMO5/ABCA3/LRRK2…	72	MF
GO:0036094	small molecule binding	81/390	2340/16967	8.42462e-05	0.00246336	0.00217444	UBE2C/TOP2A/KIF2C/MELK/KIF4A/NEK2/AURKB/KIF18B/CDC6/TRIP13/KIFC1/TTK/PBK/MKI67/CDK1/BUB1/PLK1/KIF23/BUB1B/AURKA/KIF11/TK1/KIF20A/UBE2T/RAD54L/HMMR/UHRF1/ORC1/KIF14/PKMYT1/MCM2/MCM4/KIF15/CENPE/CHEK1/RECQL4/UBE2S/ATAD2/RAD51/PLK4/TYMS/PLOD2/XRCC2/MCM6/RFC4/GCLC/ERCC6L/TXNRD1/KIF1A/POLQ/EGLN3/CDC7/MCM7/POPDC3/HASPIN/UCK2/KIF18A/BRIP1/KIF20B/ABCC2/HELLS/KIF3C/BLM/SPHK1/PIF1/APOD/CDKL2/PTGDS/ABO/DUOX…	81	MF
GO:0045132	meiotic chromosome segregation	8/401	67/17910	0.000121115	0.00252996	0.00219075	TRIP13/NCAPH/TTK/PLK1/ESPL1/SGO1/SGO2/BRIP1	8	BP
GO:0048609	multicellular organismal reproductive process	35/401	801/17910	0.0001304	0.00271231	0.00234865	TOP2A/TRIP13/NCAPH/KIFC1/TTK/CCNB1/PLK1/AURKA/ASPM/CTSV/ASF1B/RACGAP1/CIP2A/CDC25C/E2F1/RPL39L/PTTG1/FOSL1/POC1A/KNL1/TESMIN/KIF18A/STC1/BRIP1/STC2/HMGB2/FBXO5/GJB2/TSPAN8/WFDC2/SPINK1/HPGD/ROS1/PPP1R1B/LRRK2	35	BP
GO:0007064	mitotic sister chromatid cohesion	5/401	23/17910	0.00013237	0.00272168	0.00235677	CDC20/CDCA5/DSCC1/SGO1/HASPIN	5	BP
GO:0044818	mitotic G2/M transition checkpoint	5/401	23/17910	0.00013237	0.00272168	0.00235677	CDK1/CLSPN/BRCA1/TICRR/BLM	5	BP
GO:0048146	positive regulation of fibroblast proliferation	7/401	51/17910	0.000132521	0.00272168	0.00235677	CDC6/CCNA2/CCNB1/E2F1/SPHK1/AQP1/PLA2G1B	7	BP
GO:0099081	supramolecular polymer	35/411	851/18675	0.000300022	0.00272255	0.00219807	TPX2/KIF2C/KIF4A/NEK2/KIF18B/CDK1/PLK1/SPAG5/AURKA/SKA1/KIF11/SLC2A1/GTSE1/ASPM/PRC1/TNNT1/SKA3/KIF14/RACGAP1/CENPE/LMNB1/COL11A1/DSP/STMN1/PSRC1/KRT6A/KIF18A/INCENP/TUBB2B/LMNB2/KNTC1/DES/ELN/MFAP4/SCTR	35	CC
GO:0045171	intercellular bridge	7/411	59/18675	0.00030237	0.00272255	0.00219807	TPX2/KIF4A/CEP55/CDCA8/KIF23/KIF20A/CDC7	7	CC
GO:0099080	supramolecular complex	35/411	852/18675	0.000306617	0.00272255	0.00219807	TPX2/KIF2C/KIF4A/NEK2/KIF18B/CDK1/PLK1/SPAG5/AURKA/SKA1/KIF11/SLC2A1/GTSE1/ASPM/PRC1/TNNT1/SKA3/KIF14/RACGAP1/CENPE/LMNB1/COL11A1/DSP/STMN1/PSRC1/KRT6A/KIF18A/INCENP/TUBB2B/LMNB2/KNTC1/DES/ELN/MFAP4/SCTR	35	CC
GO:0019730	antimicrobial humoral response	10/401	106/17910	0.000133288	0.002726	0.0023605	FGB/KRT6A/JCHAIN/SPINK5/CLU/SLPI/DMBT1/PLA2G1B/SFTPD/PGC	10	BP
GO:0043168	anion binding	87/390	2573/16967	9.9324e-05	0.00279253	0.00246501	UBE2C/TOP2A/KIF2C/MELK/KIF4A/NEK2/AURKB/KIF18B/CDC6/TRIP13/KIFC1/TTK/PBK/MKI67/CDK1/BUB1/PLK1/KIF23/BUB1B/AURKA/KIF11/TK1/KIF20A/UBE2T/RAD54L/HMMR/ORC1/KIF14/PKMYT1/RACGAP1/MCM2/MCM4/KIF15/PFN2/CENPE/CHEK1/RECQL4/UBE2S/ATAD2/RAD51/PLK4/TYMS/PLOD2/XRCC2/COL11A1/MCM6/RFC4/CXCL10/GCLC/ERCC6L/TXNRD1/KIF1A/POLQ/MTHFD2/EGLN3/CDC7/MCM7/POPDC3/HASPIN/UCK2/KIF18A/BRIP1/KIF20B/ABCC2/HELLS/KIF3C/BLM/SPHK1/P…	87	MF
GO:0005828	kinetochore microtubule	3/411	7/18675	0.000346774	0.00302692	0.00244381	CENPE/KIF18A/KNTC1	3	CC
GO:0051054	positive regulation of DNA metabolic process	15/401	222/17910	0.000150914	0.00307362	0.00266152	FOXM1/NEK2/AURKB/CDK1/CDT1/DSCC1/RAD51/BRCA1/E2F8/RFC4/CDC7/GREM1/TIMELESS/E2F7/PARM1	15	BP
GO:0002478	antigen processing and presentation of exogenous peptide antigen	13/401	174/17910	0.000153668	0.00311672	0.00269884	KIF2C/KIF4A/KIF23/KIF11/CTSV/RACGAP1/KIF15/CENPE/KIF18A/KIF3C/HLA-DQB2/CD207/CTSE	13	BP
GO:0008242	omega peptidase activity	4/390	12/16967	0.000117552	0.0031826	0.00280933	UCHL1/GGH/GGT6/GGTLC1	4	MF
GO:0000132	establishment of mitotic spindle orientation	5/401	24/17910	0.000164151	0.00330193	0.00285922	CENPA/NDC80/PLK1/MAD2L1/SAPCD2	5	BP
GO:0010971	positive regulation of G2/M transition of mitotic cell cycle	5/401	24/17910	0.000164151	0.00330193	0.00285922	CDK1/CCNB1/DTL/CDC7/FBXO5	5	BP
GO:0032504	multicellular organism reproduction	35/401	811/17910	0.000165497	0.00331536	0.00287085	TOP2A/TRIP13/NCAPH/KIFC1/TTK/CCNB1/PLK1/AURKA/ASPM/CTSV/ASF1B/RACGAP1/CIP2A/CDC25C/E2F1/RPL39L/PTTG1/FOSL1/POC1A/KNL1/TESMIN/KIF18A/STC1/BRIP1/STC2/HMGB2/FBXO5/GJB2/TSPAN8/WFDC2/SPINK1/HPGD/ROS1/PPP1R1B/LRRK2	35	BP
GO:0019884	antigen processing and presentation of exogenous antigen	13/401	176/17910	0.000172186	0.00343529	0.0029747	KIF2C/KIF4A/KIF23/KIF11/CTSV/RACGAP1/KIF15/CENPE/KIF18A/KIF3C/HLA-DQB2/CD207/CTSE	13	BP
GO:0050790	regulation of catalytic activity	72/401	2116/17910	0.000179491	0.00356648	0.0030883	UBE2C/TPX2/CDC20/BIRC5/NEK2/AURKB/CDKN3/CDC6/NCAPH/CDK1/CCNB1/DEPDC1/PLK1/DEPDC1B/MAGEA3/MAD2L1/IQGAP3/UHRF1/KIF14/UCHL1/PKMYT1/RACGAP1/DSCC1/MCM2/ARHGAP11A/CDC25C/PFN2/CLSPN/CENPE/UBE2S/ECT2/PTTG1/CDC25A/NCAPG2/RFC4/CXCL10/EZH2/CKS2/KNL1/EGLN3/PMAIP1/PSRC1/CKS1B/GREM1/CDKN2A/DBF4/GPR87/BLM/HMGB2/FBXO5/PIF1/C3/LPL/DLC1/GPRC5C/WFDC2/CPAMD8/AQP1/PARM1/SPINK5/SPINK1/CXCL17/AGER/CLU/CTSH/RAP1GAP/PPP1…	72	BP
GO:2001020	regulation of response to DNA damage stimulus	14/401	201/17910	0.000181627	0.0035943	0.00311239	FOXM1/RAD51AP1/CHEK1/AUNIP/RAD51/BRCA1/DDIAS/POLQ/PARPBP/PMAIP1/TIMELESS/FBXO5/MUC1/CLU	14	BP
GO:0044703	multi-organism reproductive process	40/401	980/17910	0.000183413	0.00361501	0.00313032	TOP2A/TRIP13/NCAPH/KIFC1/TTK/CDK1/CCNB1/PLK1/AURKA/SLC2A1/ASPM/CTSV/ASF1B/RACGAP1/CIP2A/CDC25C/E2F1/RPL39L/PTTG1/FOSL1/POC1A/KNL1/TESMIN/KIF18A/STC1/BRIP1/ABCC2/STC2/HMGB2/FBXO5/CLGN/GJB2/TSPAN8/WFDC2/SPINK1/HPGD/ROS1/PPP1R1B/LRRK2/SCGB1A1	40	BP
GO:0000723	telomere maintenance	12/401	154/17910	0.000184913	0.00362994	0.00314324	NEK2/AURKB/EXO1/CCNE1/RECQL4/RAD51/RFC4/FEN1/POLE2/BLM/PRIM1/PIF1	12	BP
GO:0007292	female gamete generation	11/401	132/17910	0.00018958	0.00370666	0.00320969	TOP2A/TRIP13/NCAPH/TTK/CCNB1/PLK1/AURKA/ASPM/FOSL1/FBXO5/HPGD	11	BP
GO:0000217	DNA secondary structure binding	5/390	23/16967	0.000149529	0.00390377	0.00344591	NEIL3/RECQL4/XRCC2/BLM/HMGB2	5	MF
GO:2000779	regulation of double-strand break repair	8/401	72/17910	0.000201677	0.00392748	0.00340089	FOXM1/RAD51AP1/CHEK1/AUNIP/RAD51/POLQ/PARPBP/TIMELESS	8	BP
GO:0006575	cellular modified amino acid metabolic process	13/401	179/17910	0.000203547	0.00394817	0.00341881	TYMS/PLOD2/GCLC/MTHFD2/EGLN3/PLA2G4F/DUOXA1/DUOX1/GGT6/PLA2G10/PLA2G1B/GGTLC1/FOLR1	13	BP
GO:0072425	signal transduction involved in G2 DNA damage checkpoint	4/401	14/17910	0.00020739	0.00395985	0.00342892	PLK1/DTL/CHEK1/BRCA1	4	BP
GO:0090231	regulation of spindle checkpoint	4/401	14/17910	0.00020739	0.00395985	0.00342892	CCNB1/NDC80/MAD2L1/CDT1	4	BP
GO:0090266	regulation of mitotic cell cycle spindle assembly checkpoint	4/401	14/17910	0.00020739	0.00395985	0.00342892	CCNB1/NDC80/MAD2L1/CDT1	4	BP
GO:1903504	regulation of mitotic spindle checkpoint	4/401	14/17910	0.00020739	0.00395985	0.00342892	CCNB1/NDC80/MAD2L1/CDT1	4	BP
GO:0035639	purine ribonucleoside triphosphate binding	63/390	1732/16967	0.000157352	0.00396635	0.00350115	UBE2C/TOP2A/KIF2C/MELK/KIF4A/NEK2/AURKB/KIF18B/CDC6/TRIP13/KIFC1/TTK/PBK/MKI67/CDK1/BUB1/PLK1/KIF23/BUB1B/AURKA/KIF11/TK1/KIF20A/UBE2T/RAD54L/ORC1/KIF14/PKMYT1/MCM2/MCM4/KIF15/CENPE/CHEK1/RECQL4/UBE2S/ATAD2/RAD51/PLK4/XRCC2/MCM6/RFC4/GCLC/ERCC6L/KIF1A/POLQ/CDC7/MCM7/HASPIN/UCK2/KIF18A/BRIP1/KIF20B/ABCC2/HELLS/KIF3C/BLM/SPHK1/PIF1/CDKL2/ROS1/ABCA3/LRRK2/ATP13A4	63	MF
GO:0016321	female meiosis chromosome segregation	3/401	6/17910	0.000211893	0.00396832	0.00343626	NCAPH/TTK/PLK1	3	BP
GO:0043152	induction of bacterial agglutination	3/401	6/17910	0.000211893	0.00396832	0.00343626	FGB/DMBT1/SFTPD	3	BP
GO:0045842	positive regulation of mitotic metaphase/anaphase transition	3/401	6/17910	0.000211893	0.00396832	0.00343626	DLGAP5/ESPL1/CDT1	3	BP
GO:0090306	spindle assembly involved in meiosis	3/401	6/17910	0.000211893	0.00396832	0.00343626	AURKA/ASPM/FBXO5	3	BP
GO:1901970	positive regulation of mitotic sister chromatid separation	3/401	6/17910	0.000211893	0.00396832	0.00343626	DLGAP5/ESPL1/CDT1	3	BP
GO:0008026	ATP-dependent helicase activity	7/390	52/16967	0.000176231	0.00412603	0.0036421	MCM4/RECQL4/MCM6/MCM7/BRIP1/BLM/PIF1	7	MF
GO:0070035	purine NTP-dependent helicase activity	7/390	52/16967	0.000176231	0.00412603	0.0036421	MCM4/RECQL4/MCM6/MCM7/BRIP1/BLM/PIF1	7	MF
GO:0004386	helicase activity	11/390	128/16967	0.00018062	0.00412603	0.0036421	RAD54L/MCM2/MCM4/RECQL4/MCM6/ERCC6L/MCM7/BRIP1/HELLS/BLM/PIF1	11	MF
GO:0006511	ubiquitin-dependent protein catabolic process	25/401	510/17910	0.000224293	0.00418451	0.00362347	UBE2C/CDC20/AURKB/PBK/CDK1/CCNB1/PLK1/BUB1B/AURKA/MAD2L1/UHRF1/KIF14/UCHL1/DTL/UBE2S/PTTG1/GCLC/FBXO5/SKP2/CCNF/ECRG4/IL33/SHH/CLU/LRRK2	25	BP
GO:0042493	response to drug	39/401	958/17910	0.000233227	0.00433465	0.00375347	CCNA2/CDK1/CCNB1/CENPF/RAD54L/GGH/ECT2/RAD51/TYMS/BRCA1/FOSL1/GCLC/EIF4EBP1/EZH2/MCM7/GAL/TIMELESS/ABCC2/BLM/HMGB2/SPHK1/SNCG/GJB2/APOD/SLC44A4/LPL/CPB2/AQP1/KCNQ1/HPGD/ABCA3/PPP1R1B/LRRK2/SLC22A3/CLDN18/AQP5/SCGB1A1/FOLR1/CYP4B1	39	BP
GO:0003697	single-stranded DNA binding	9/390	90/16967	0.000223408	0.00465389	0.00410805	RAD51AP1/NEIL3/MCM4/RAD51/MCM6/MCM7/BLM/HMGB2/JCHAIN	9	MF
GO:0032555	purine ribonucleotide binding	64/390	1790/16967	0.000224357	0.00465389	0.00410805	UBE2C/TOP2A/KIF2C/MELK/KIF4A/NEK2/AURKB/KIF18B/CDC6/TRIP13/KIFC1/TTK/PBK/MKI67/CDK1/BUB1/PLK1/KIF23/BUB1B/AURKA/KIF11/TK1/KIF20A/UBE2T/RAD54L/ORC1/KIF14/PKMYT1/MCM2/MCM4/KIF15/CENPE/CHEK1/RECQL4/UBE2S/ATAD2/RAD51/PLK4/XRCC2/MCM6/RFC4/GCLC/ERCC6L/KIF1A/POLQ/CDC7/MCM7/POPDC3/HASPIN/UCK2/KIF18A/BRIP1/KIF20B/ABCC2/HELLS/KIF3C/BLM/SPHK1/PIF1/CDKL2/ROS1/ABCA3/LRRK2/ATP13A4	64	MF
GO:0043515	kinetochore binding	3/390	6/16967	0.000228917	0.00465389	0.00410805	TTK/CENPE/CENPH	3	MF
GO:0035173	histone kinase activity	4/390	14/16967	0.000229193	0.00465389	0.00410805	AURKB/CDK1/CHEK1/HASPIN	4	MF
GO:0045859	regulation of protein kinase activity	32/401	732/17910	0.000251755	0.00466128	0.00403631	TPX2/CDKN3/CDC6/CDK1/CCNB1/PLK1/IQGAP3/KIF14/UCHL1/PKMYT1/CDC25C/CLSPN/CENPE/ECT2/CDC25A/NCAPG2/CXCL10/EZH2/CKS2/PSRC1/CKS1B/GREM1/CDKN2A/DBF4/BLM/GPRC5C/CXCL17/AGER/CLU/PPP1R1B/LRRK2/PLA2G1B	32	BP
GO:0019941	modification-dependent protein catabolic process	25/401	515/17910	0.00025992	0.0047943	0.0041515	UBE2C/CDC20/AURKB/PBK/CDK1/CCNB1/PLK1/BUB1B/AURKA/MAD2L1/UHRF1/KIF14/UCHL1/DTL/UBE2S/PTTG1/GCLC/FBXO5/SKP2/CCNF/ECRG4/IL33/SHH/CLU/LRRK2	25	BP
GO:0017076	purine nucleotide binding	64/390	1798/16967	0.000253805	0.00501436	0.00442624	UBE2C/TOP2A/KIF2C/MELK/KIF4A/NEK2/AURKB/KIF18B/CDC6/TRIP13/KIFC1/TTK/PBK/MKI67/CDK1/BUB1/PLK1/KIF23/BUB1B/AURKA/KIF11/TK1/KIF20A/UBE2T/RAD54L/ORC1/KIF14/PKMYT1/MCM2/MCM4/KIF15/CENPE/CHEK1/RECQL4/UBE2S/ATAD2/RAD51/PLK4/XRCC2/MCM6/RFC4/GCLC/ERCC6L/KIF1A/POLQ/CDC7/MCM7/POPDC3/HASPIN/UCK2/KIF18A/BRIP1/KIF20B/ABCC2/HELLS/KIF3C/BLM/SPHK1/PIF1/CDKL2/ROS1/ABCA3/LRRK2/ATP13A4	64	MF
GO:0090197	positive regulation of chemokine secretion	4/401	15/17910	0.000277824	0.00510528	0.00442078	IL33/LPL/CHIA/ALOX15B	4	BP
GO:0010569	regulation of double-strand break repair via homologous recombination	6/401	41/17910	0.000281091	0.00514597	0.00445601	RAD51AP1/CHEK1/RAD51/POLQ/PARPBP/TIMELESS	6	BP
GO:0032553	ribonucleotide binding	64/390	1804/16967	0.000278151	0.00535075	0.00472317	UBE2C/TOP2A/KIF2C/MELK/KIF4A/NEK2/AURKB/KIF18B/CDC6/TRIP13/KIFC1/TTK/PBK/MKI67/CDK1/BUB1/PLK1/KIF23/BUB1B/AURKA/KIF11/TK1/KIF20A/UBE2T/RAD54L/ORC1/KIF14/PKMYT1/MCM2/MCM4/KIF15/CENPE/CHEK1/RECQL4/UBE2S/ATAD2/RAD51/PLK4/XRCC2/MCM6/RFC4/GCLC/ERCC6L/KIF1A/POLQ/CDC7/MCM7/POPDC3/HASPIN/UCK2/KIF18A/BRIP1/KIF20B/ABCC2/HELLS/KIF3C/BLM/SPHK1/PIF1/CDKL2/ROS1/ABCA3/LRRK2/ATP13A4	64	MF
GO:1902751	positive regulation of cell cycle G2/M phase transition	5/401	27/17910	0.000295026	0.00538092	0.00465947	CDK1/CCNB1/DTL/CDC7/FBXO5	5	BP
GO:0051384	response to glucocorticoid	11/401	139/17910	0.000297746	0.00541034	0.00468494	CTSV/TYMS/FOSL1/EIF4EBP1/STC1/ABCC2/GJB2/AQP1/ABCA3/ALPL/SCGB1A1	11	BP
GO:0043632	modification-dependent macromolecule catabolic process	25/401	522/17910	0.000318188	0.00576039	0.00498805	UBE2C/CDC20/AURKB/PBK/CDK1/CCNB1/PLK1/BUB1B/AURKA/MAD2L1/UHRF1/KIF14/UCHL1/DTL/UBE2S/PTTG1/GCLC/FBXO5/SKP2/CCNF/ECRG4/IL33/SHH/CLU/LRRK2	25	BP
GO:0019953	sexual reproduction	34/401	808/17910	0.000326419	0.00588758	0.00509819	TOP2A/TRIP13/NCAPH/KIFC1/TTK/CDK1/CCNB1/PLK1/AURKA/ASPM/CTSV/ASF1B/RACGAP1/CIP2A/CDC25C/E2F1/RPL39L/PTTG1/FOSL1/POC1A/KNL1/TESMIN/KIF18A/BRIP1/HMGB2/FBXO5/CLGN/TSPAN8/WFDC2/SPINK1/HPGD/ROS1/PPP1R1B/LRRK2	34	BP
GO:0048002	antigen processing and presentation of peptide antigen	13/401	188/17910	0.000328659	0.00590619	0.00511431	KIF2C/KIF4A/KIF23/KIF11/CTSV/RACGAP1/KIF15/CENPE/KIF18A/KIF3C/HLA-DQB2/CD207/CTSE	13	BP
GO:0010458	exit from mitosis	5/401	28/17910	0.000352617	0.00626761	0.00542727	UBE2C/ANLN/CDCA5/UBE2S/KNTC1	5	BP
GO:0045737	positive regulation of cyclin-dependent protein serine/threonine kinase activity	5/401	28/17910	0.000352617	0.00626761	0.00542727	CDC6/CCNB1/CKS2/PSRC1/CKS1B	5	BP
GO:0051294	establishment of spindle orientation	5/401	28/17910	0.000352617	0.00626761	0.00542727	CENPA/NDC80/PLK1/MAD2L1/SAPCD2	5	BP
GO:0051246	regulation of protein metabolic process	86/401	2700/17910	0.000357435	0.00629828	0.00545383	UBE2C/TPX2/CDC20/BIRC5/FOXM1/CDKN3/CDC6/TTK/PBK/CDK1/CCNB1/PLK1/AURKA/FAM83D/IGF2BP3/MAGEA3/MAD2L1/FGB/IQGAP3/UHRF1/KIF14/CDCA2/UCHL1/PKMYT1/CDC25C/PFN2/DTL/CLSPN/CENPE/CHEK1/UBE2S/ECT2/TYMS/PTTG1/CDC25A/NCAPG2/BRCA1/FANCI/CXCL10/GCLC/EIF4EBP1/EZH2/CKS2/IGF2BP2/EGLN3/PMAIP1/PSRC1/CKS1B/MELTF/GREM1/CDKN2A/DBF4/SEMA3A/BLM/SPHK1/FBXO5/SKP2/C3/APOD/MUC1/CLEC3B/IL33/DLC1/GPRC5C/WFDC2/CPB2/SHH/KLF15/CP…	86	BP
GO:0007096	regulation of exit from mitosis	4/401	16/17910	0.000363914	0.00629828	0.00545383	UBE2C/ANLN/CDCA5/KNTC1	4	BP
GO:0016540	protein autoprocessing	4/401	16/17910	0.000363914	0.00629828	0.00545383	KLK6/PCSK2/TMPRSS2/CTSE	4	BP
GO:0030397	membrane disassembly	4/401	16/17910	0.000363914	0.00629828	0.00545383	CCNB2/CDK1/CCNB1/PLK1	4	BP
GO:0051081	nuclear envelope disassembly	4/401	16/17910	0.000363914	0.00629828	0.00545383	CCNB2/CDK1/CCNB1/PLK1	4	BP
GO:0007144	female meiosis I	3/401	7/17910	0.000364651	0.00629828	0.00545383	TRIP13/AURKA/FBXO5	3	BP
GO:0032466	negative regulation of cytokinesis	3/401	7/17910	0.000364651	0.00629828	0.00545383	AURKB/E2F8/E2F7	3	BP
GO:1902101	positive regulation of metaphase/anaphase transition of cell cycle	3/401	7/17910	0.000364651	0.00629828	0.00545383	DLGAP5/ESPL1/CDT1	3	BP
GO:0032200	telomere organization	12/401	167/17910	0.000390675	0.00672401	0.00582248	NEK2/AURKB/EXO1/CCNE1/RECQL4/RAD51/RFC4/FEN1/POLE2/BLM/PRIM1/PIF1	12	BP
GO:0000808	origin recognition complex	3/411	9/18675	0.000805332	0.00677243	0.00546777	ORC1/MCM2/ORC6	3	CC
GO:0070938	contractile ring	3/411	9/18675	0.000805332	0.00677243	0.00546777	ANLN/PRC1/KIF20B	3	CC
GO:0000795	synaptonemal complex	5/411	34/18675	0.000828472	0.00677243	0.00546777	PLK1/RAD51/BRCA1/INCENP/BLM	5	CC
GO:0099086	synaptonemal structure	5/411	34/18675	0.000828472	0.00677243	0.00546777	PLK1/RAD51/BRCA1/INCENP/BLM	5	CC
GO:0005721	pericentric heterochromatin	4/411	20/18675	0.000846856	0.00681454	0.00550178	CENPA/HELLS/INCENP/ESCO2	4	CC
GO:0008574	ATP-dependent microtubule motor activity, plus-end-directed	3/390	7/16967	0.000393773	0.00719621	0.00635219	KIF14/KIF18A/KIF20B	3	MF
GO:0036310	annealing helicase activity	3/390	7/16967	0.000393773	0.00719621	0.00635219	RAD54L/RECQL4/BLM	3	MF
GO:0046677	response to antibiotic	18/401	328/17910	0.000456837	0.00781375	0.00676611	CDK1/GGH/ECT2/TYMS/FOSL1/EIF4EBP1/EZH2/TIMELESS/SPHK1/GJB2/PLA2G4F/AQP1/CLU/HPGD/LRRK2/ALPL/CLDN18/SCGB1A1	18	BP
GO:0019882	antigen processing and presentation	14/401	220/17910	0.000457188	0.00781375	0.00676611	KIF2C/KIF4A/KIF23/KIF11/CTSV/RACGAP1/KIF15/CENPE/KIF18A/KIF3C/HLA-DQB2/CTSH/CD207/CTSE	14	BP
GO:0005680	anaphase-promoting complex	4/411	21/18675	0.00102808	0.00814558	0.0065764	UBE2C/CDC20/BUB1B/UBE2S	4	CC
GO:0016324	apical plasma membrane	16/411	300/18675	0.00105579	0.00823838	0.00665133	SLC2A1/ASPM/SAPCD2/SLC7A5/STC1/ABCC2/SLC44A4/ECRG4/AQP1/DUOX1/AGER/SLC34A2/SCNN1B/AQP5/SLC26A9/FOLR1	16	CC
GO:0072687	meiotic spindle	3/411	10/18675	0.00113174	0.00869922	0.00702338	AURKA/ASPM/FBXO5	3	CC
GO:0008284	positive regulation of cell proliferation	37/401	931/17910	0.000532121	0.00906275	0.00784764	CDC20/BIRC5/FOXM1/CDC6/CCNA2/TTK/CDK1/CCNB1/MMP12/ASPM/PRC1/IQGAP3/KIF14/SAPCD2/CIP2A/PRAME/E2F1/FOSL1/CXCL10/EZH2/CDC7/KRT6A/GREM1/HILPDA/CTHRC1/KIF20B/HMGB2/SPHK1/FBXO5/SKP2/SHH/AQP1/AGER/HPGD/CTSH/VEGFD/PLA2G1B	37	BP
GO:0000733	DNA strand renaturation	3/401	8/17910	0.000573759	0.00963757	0.00834539	RAD54L/RECQL4/BLM	3	BP
GO:0046602	regulation of mitotic centrosome separation	3/401	8/17910	0.000573759	0.00963757	0.00834539	NEK2/KIF11/CHEK1	3	BP
GO:0085020	protein K6-linked ubiquitination	3/401	8/17910	0.000573759	0.00963757	0.00834539	UBE2T/UBE2S/BRCA1	3	BP
GO:1905820	positive regulation of chromosome separation	3/401	8/17910	0.000573759	0.00963757	0.00834539	DLGAP5/ESPL1/CDT1	3	BP
GO:0000018	regulation of DNA recombination	8/401	84/17910	0.000582096	0.00974413	0.00843767	KPNA2/RAD51AP1/CHEK1/RAD51/POLQ/PARPBP/TIMELESS/BLM	8	BP
GO:0045177	apical part of cell	18/411	365/18675	0.00128904	0.00976261	0.00788192	SLC2A1/ASPM/CTSV/SAPCD2/SLC7A5/STC1/ABCC2/SLC44A4/ECRG4/AQP1/DUOX1/AGER/SLC34A2/ADGRF5/SCNN1B/AQP5/SLC26A9/FOLR1	18	CC
GO:0070828	heterochromatin organization	4/401	18/17910	0.000590536	0.00981816	0.00850177	HMGA1/HELLS/CDKN2A/PRDM16	4	BP
GO:0090196	regulation of chemokine secretion	4/401	18/17910	0.000590536	0.00981816	0.00850177	IL33/LPL/CHIA/ALOX15B	4	BP
GO:0051438	regulation of ubiquitin-protein transferase activity	6/401	47/17910	0.000599599	0.00990149	0.00857393	UBE2C/CDC20/PLK1/MAD2L1/UBE2S/FBXO5	6	BP
GO:0072698	protein localization to microtubule cytoskeleton	6/401	47/17910	0.000599599	0.00990149	0.00857393	TTK/SPAG5/AURKA/FAM83D/STIL/KIF20B	6	BP
GO:0000152	nuclear ubiquitin ligase complex	5/411	38/18675	0.00139065	0.0102447	0.00827112	UBE2C/CDC20/BUB1B/UBE2S/BRCA1	5	CC
GO:0044450	microtubule organizing center part	11/411	170/18675	0.00139248	0.0102447	0.00827112	TOP2A/CEP55/PLK1/SPAG5/AURKA/PLK4/BRCA1/STIL/POC1A/WDR62/CCNF	11	CC
GO:0000784	nuclear chromosome, telomeric region	9/411	121/18675	0.00143249	0.0103906	0.00838891	CDK1/ORC1/MCM2/MCM4/RAD51/MCM6/FEN1/MCM7/PIF1	9	CC
GO:1990023	mitotic spindle midzone	3/411	11/18675	0.00153084	0.0107261	0.00865979	AURKB/CENPE/KIF20B	3	CC
GO:0032153	cell division site	6/411	57/18675	0.00154122	0.0107261	0.00865979	ANLN/CEP55/KIF20A/RACGAP1/ECT2/PLK4	6	CC
GO:0032155	cell division site part	6/411	57/18675	0.00154122	0.0107261	0.00865979	ANLN/CEP55/KIF20A/RACGAP1/ECT2/PLK4	6	CC
GO:0065009	regulation of molecular function	94/401	3065/17910	0.000653559	0.0107562	0.00931406	UBE2C/TPX2/CDC20/BIRC5/HJURP/NEK2/AURKB/CDCA5/CDKN3/CDC6/NCAPH/CDK1/CCNB1/DEPDC1/PLK1/AURKA/DEPDC1B/MAGEA3/MAD2L1/IQGAP3/CDT1/UHRF1/KIF14/UCHL1/PKMYT1/RACGAP1/DSCC1/MCM2/ARHGAP11A/CDC25C/PFN2/E2F1/CLSPN/CENPE/UBE2S/ECT2/PTTG1/CDC25A/NCAPG2/FOSL1/RFC4/CXCL10/STMN1/EZH2/CKS2/KNL1/EGLN3/PMAIP1/PSRC1/CKS1B/GAL/GREM1/STC1/CTHRC1/CXCL8/CDKN2A/STC2/DBF4/GPR87/BLM/HMGB2/SPHK1/FBXO5/PIF1/C3/BMP3/IL33/LPL/…	94	BP
GO:0043549	regulation of kinase activity	33/401	807/17910	0.000656034	0.0107607	0.00931796	TPX2/CDKN3/CDC6/CDK1/CCNB1/PLK1/IQGAP3/KIF14/UCHL1/PKMYT1/CDC25C/CLSPN/CENPE/ECT2/CDC25A/NCAPG2/CXCL10/EZH2/CKS2/PSRC1/CKS1B/GREM1/CDKN2A/DBF4/BLM/GPRC5C/CXCL17/AGER/CLU/PPP1R1B/LRRK2/FOXA2/PLA2G1B	33	BP
GO:0003774	motor activity	9/390	103/16967	0.000611419	0.0107789	0.00951465	KIF18B/KIFC1/KIF14/KIF15/CENPE/KIF1A/KIF18A/KIF20B/KIF3C	9	MF
GO:0000405	bubble DNA binding	3/390	8/16967	0.000619306	0.0107789	0.00951465	NEIL3/RECQL4/BLM	3	MF
GO:0051173	positive regulation of nitrogen compound metabolic process	89/401	2870/17910	0.000665675	0.0108823	0.00942326	MYBL2/UBE2C/TPX2/CDC20/TOP2A/DLGAP5/FOXM1/NEK2/AURKB/CDC6/CCNA2/TTK/CDK1/CCNB1/PLK1/MMP12/AURKA/CCNE1/FGB/IQGAP3/CDT1/UHRF1/KIF14/CDCA2/DSCC1/PFN2/DTL/E2F1/CLSPN/CENPE/CHEK1/UBE2S/ATAD2/ECT2/RAD51/HMGA1/NCAPG2/BRCA1/FOSL1/FANCI/E2F8/RFC4/CXCL10/GCLC/ARNTL2/EZH2/CKS2/EGLN3/CDC7/PMAIP1/PSRC1/CKS1B/E2F2/MELTF/GAL/GREM1/TIMELESS/E2F7/DBF4/SEMA3A/BLM/HMGB2/SPHK1/SKP2/C3/HAS3/MUC1/ZNF750/CLEC3B/PRDM16/…	89	BP
GO:1904031	positive regulation of cyclin-dependent protein kinase activity	5/401	32/17910	0.000671338	0.0109383	0.00947175	CDC6/CCNB1/CKS2/PSRC1/CKS1B	5	BP
GO:0009605	response to external stimulus	75/401	2331/17910	0.000693431	0.0112608	0.00975095	PBK/CCNB1/MMP12/SLC2A1/CTSV/FGB/CHEK1/TYMS/HMGA1/COL11A1/FOSL1/COCH/CXCL10/GCLC/ARNTL2/C15orf48/APOBEC3B/EIF4EBP1/STMN1/PMAIP1/KRT6A/GREM1/STC1/BRIP1/SLC16A1/CXCL8/ABCC2/STC2/TUBB2B/SEMA3A/HMGB2/SPHK1/SKP2/GJB2/JCHAIN/C3/APOD/MACROD2/TSPAN8/SERPIND1/IL33/LPL/CXCL14/CPB2/SHH/MMP28/DUOXA1/AQP1/NKX2-1/SPINK5/SCN7A/CXCL17/AGER/CLU/HPGD/RAP1GAP/LRRK2/VEGFD/SLPI/FOXA2/AQP3/ALPL/DMBT1/PLA2G10/CD207/SLC2…	75	BP
GO:0005814	centriole	9/411	124/18675	0.00169884	0.0116305	0.00938999	TOP2A/CEP55/PLK1/AURKA/PLK4/STIL/POC1A/WDR62/CCNF	9	CC
GO:0031012	extracellular matrix	21/411	468/18675	0.00171635	0.0116305	0.00938999	MMP12/FGB/COL11A1/COCH/GREM1/CTHRC1/ORM1/LGALS4/CLEC3B/ADAMTS8/NDNF/SHH/MMP28/PRG4/MGP/CLU/CTSH/ELN/MFAP4/SLPI/ALPL	21	CC
GO:1901796	regulation of signal transduction by p53 class mediator	12/401	179/17910	0.00072716	0.0117694	0.0101914	TPX2/AURKB/EXO1/AURKA/CHEK1/BRCA1/RFC4/PMAIP1/BRIP1/BLM/RMI2/MUC1	12	BP
GO:0006833	water transport	4/401	19/17910	0.000734879	0.0118551	0.0102656	AQP1/AQP3/AQP4/AQP5	4	BP
GO:0003006	developmental process involved in reproduction	28/401	649/17910	0.000747228	0.0120146	0.0104038	TRIP13/CCNB1/AURKA/ASPM/CTSV/CENPI/PLK4/FOSL1/SERPINB5/E2F8/KNL1/KIF18A/STC1/BRIP1/E2F7/STC2/SEMA3A/HMGB2/FBXO5/CCNF/GJB2/CDKL2/SHH/NKX2-1/SPINK1/ALOX15B/ALPL/GJB1	28	BP
GO:0031960	response to corticosteroid	11/401	155/17910	0.000750145	0.012022	0.0104101	CTSV/TYMS/FOSL1/EIF4EBP1/STC1/ABCC2/GJB2/AQP1/ABCA3/ALPL/SCGB1A1	11	BP
GO:0016787	hydrolase activity	69/390	2052/16967	0.000710187	0.0120732	0.0106572	TOP2A/DLGAP5/KIF18B/CDKN3/KIFC1/MMP12/EXO1/CTSV/ESPL1/RAD54L/KIF14/NEIL3/UCHL1/DSCC1/MCM2/MCM4/GGH/CDC25C/KIF15/PFN2/CENPE/RECQL4/ATAD2/RAD51/GNG4/CDC25A/XRCC2/MCM6/RFC4/ERCC6L/FEN1/APOBEC3B/KIF1A/POLQ/MTHFD2/MCM7/KIF18A/BRIP1/GZMB/TMPRSS11E/KIF20B/HELLS/TUBB2B/KIF3C/BLM/PIF1/KLK6/MACROD2/LPL/ADAMTS8/PLA2G4F/SHH/MMP28/CTSH/RAP1GAP/PCSK2/TMPRSS2/LRRK2/CHIA/ATP13A4/RNASE1/GGT6/ALPL/PLA2G10/CTSE/PLA…	69	MF
GO:0022607	cellular component assembly	86/401	2765/17910	0.0007656	0.0122296	0.0105899	MYBL2/UBE2C/TPX2/CDC20/ANLN/CENPA/HJURP/KIF4A/RRM2/NEK2/AURKB/TRIP13/KIFC1/CDK1/CCNB1/PLK1/KIF23/CENPF/SPAG5/EXO1/AURKA/KIF11/SLC2A1/TK1/ASPM/CENPW/FGB/CDT1/KIF14/ASF1B/RACGAP1/MCM2/CENPU/PFN2/CENPE/UBE2S/OIP5/ECT2/RAD51/CENPI/PLK4/HMGA1/BRCA1/FOSL1/CENPM/STIL/EIF4EBP1/STMN1/POLQ/POC1A/KNL1/TICRR/CENPK/DIAPH3/PMAIP1/PSRC1/GREM1/WDR62/CENPN/BRIP1/HELLS/CDKN2A/CENPH/KIF3C/BLM/CHAF1B/HMGB2/FBXO5/KNT…	86	BP
GO:0031398	positive regulation of protein ubiquitination	9/401	110/17910	0.00081945	0.0130471	0.0112978	UBE2C/CDC20/PLK1/UBE2S/BRCA1/FANCI/SPHK1/SKP2/LRRK2	9	BP
GO:0005771	multivesicular body	5/411	41/18675	0.00196731	0.013158	0.0106232	CTSH/LRRK2/NAPSA/SFTPC/SFTPB	5	CC
GO:0044380	protein localization to cytoskeleton	6/401	50/17910	0.000838747	0.013311	0.0115263	TTK/SPAG5/AURKA/FAM83D/STIL/KIF20B	6	BP
GO:0051603	proteolysis involved in cellular protein catabolic process	26/401	590/17910	0.000844699	0.0133453	0.011556	UBE2C/CDC20/AURKB/PBK/CDK1/CCNB1/PLK1/BUB1B/AURKA/MAD2L1/UHRF1/KIF14/UCHL1/DTL/UBE2S/PTTG1/GCLC/PMAIP1/FBXO5/SKP2/CCNF/ECRG4/IL33/SHH/CLU/LRRK2	26	BP
GO:0032875	regulation of DNA endoreduplication	3/401	9/17910	0.00084637	0.0133453	0.011556	E2F8/E2F7/FBXO5	3	BP
GO:0090195	chemokine secretion	4/401	20/17910	0.000902484	0.0141844	0.0122826	IL33/LPL/CHIA/ALOX15B	4	BP
GO:0006282	regulation of DNA repair	9/401	112/17910	0.000932551	0.0145753	0.0126211	FOXM1/RAD51AP1/CHEK1/AUNIP/RAD51/BRCA1/POLQ/PARPBP/TIMELESS	9	BP
GO:0071456	cellular response to hypoxia	13/401	210/17910	0.000933323	0.0145753	0.0126211	CCNA2/CCNB1/E2F1/EIF4EBP1/EGLN3/PMAIP1/STC1/HILPDA/BRIP1/STC2/NDNF/AQP1/AQP3	13	BP
GO:0071407	cellular response to organic cyclic compound	24/401	532/17910	0.000964369	0.0150122	0.0129994	CCNA2/CCNB1/CCNE1/RAD51/BRCA1/GCLC/EIF4EBP1/EZH2/KIF18A/STC1/SLC16A1/ABCC2/BLM/SKP2/GJB2/SCGB2A1/PLA2G4F/AQP1/KCNQ1/LMO3/CLU/LRRK2/ALPL/FOLR1	24	BP
GO:1990752	microtubule end	4/411	26/18675	0.00235468	0.0154204	0.0124498	KIF2C/KIF18B/SPAG5/ASPM	4	CC
GO:0070062	extracellular exosome	67/411	2162/18675	0.00236546	0.0154204	0.0124498	CDK1/SLC2A1/FGB/RACGAP1/GGH/PFN2/ATAD2/PSAT1/GNG4/PLOD2/DSP/STMN1/SLC7A5/TXNRD1/MELTF/KRT6A/SLC16A1/PFKP/SNCG/ORM1/JCHAIN/C3/APOD/BMP3/SLC44A4/MUC1/DES/TSPAN8/PTGDS/SERPIND1/CLEC3B/GPRC5C/WFDC2/CPB2/B3GNT8/FCGBP/AQP1/MGP/SPINK1/IGHD/CLU/HPGD/CTSH/CRTAC1/TMPRSS2/LRRK2/RNASE1/ALOX15B/SLPI/GGT6/C1orf116/SCNN1B/CRYM/ALPL/SELENBP1/DMBT1/C7/AQP5/SLC26A9/SUSD2/PEBP4/SCGB1A1/FOLR1/PIGR/NAPSA/SCGB3A1/C16o…	67	CC
GO:0051493	regulation of cytoskeleton organization	22/401	471/17910	0.000996534	0.0154637	0.0133904	TPX2/NEK2/PLK1/SPAG5/AURKA/SKA1/KIF11/SKA3/PFN2/CHEK1/ECT2/PLK4/BRCA1/TACC3/STIL/STMN1/POC1A/PSRC1/KIF18A/CCNF/DLC1/ELN	22	BP
GO:0031399	regulation of protein modification process	58/401	1718/17910	0.0010028	0.0155117	0.0134319	UBE2C/TPX2/CDC20/FOXM1/CDKN3/CDC6/TTK/PBK/CDK1/CCNB1/PLK1/FAM83D/MAD2L1/FGB/IQGAP3/KIF14/CDCA2/UCHL1/PKMYT1/CDC25C/PFN2/CLSPN/CENPE/CHEK1/UBE2S/ECT2/CDC25A/NCAPG2/BRCA1/FANCI/CXCL10/GCLC/EZH2/CKS2/PSRC1/CKS1B/GREM1/CDKN2A/DBF4/SEMA3A/BLM/SPHK1/FBXO5/SKP2/C3/MUC1/DLC1/GPRC5C/KLF15/LMO3/SPINK1/CXCL17/AGER/CLU/ROS1/PPP1R1B/LRRK2/PLA2G1B	58	BP
GO:0045740	positive regulation of DNA replication	5/401	35/17910	0.00102434	0.0157948	0.0136771	CDK1/CDT1/E2F8/CDC7/E2F7	5	BP
GO:0016485	protein processing	16/401	295/17910	0.00105444	0.0162079	0.0140348	MAGEA3/FGB/MELTF/KLK6/C3/CLEC3B/CPB2/SHH/CLU/CTSH/PCSK2/TMPRSS2/LRRK2/CTSE/C7/C4BPA	16	BP
GO:0007063	regulation of sister chromatid cohesion	4/401	21/17910	0.00109529	0.0167305	0.0144874	CDCA5/BUB1/ESPL1/FEN1	4	BP
GO:0010884	positive regulation of lipid storage	4/401	21/17910	0.00109529	0.0167305	0.0144874	HILPDA/C3/LPL/PLA2G10	4	BP
GO:0046456	icosanoid biosynthetic process	6/401	53/17910	0.00114545	0.0174423	0.0151037	PTGDS/PLA2G4F/HPGD/GGT6/PLA2G1B/GGTLC1	6	BP
GO:0051707	response to other organism	35/401	903/17910	0.00116132	0.0176289	0.0152653	MMP12/FGB/HMGA1/FOSL1/COCH/CXCL10/C15orf48/APOBEC3B/STMN1/PMAIP1/KRT6A/CXCL8/ABCC2/HMGB2/SKP2/GJB2/JCHAIN/C3/MACROD2/IL33/LPL/SPINK5/SCN7A/CLU/HPGD/VEGFD/SLPI/ALPL/DMBT1/CD207/GKN2/PLA2G1B/SFTPD/SCGB1A1/PGC	35	BP
GO:0009607	response to biotic stimulus	36/401	938/17910	0.0011758	0.0177935	0.0154078	MMP12/FGB/HMGA1/EME1/FOSL1/COCH/CXCL10/C15orf48/APOBEC3B/STMN1/PMAIP1/KRT6A/CXCL8/ABCC2/HMGB2/SKP2/GJB2/JCHAIN/C3/MACROD2/IL33/LPL/SPINK5/SCN7A/CLU/HPGD/VEGFD/SLPI/ALPL/DMBT1/CD207/GKN2/PLA2G1B/SFTPD/SCGB1A1/PGC	36	BP
GO:0035985	senescence-associated heterochromatin focus	2/411	4/18675	0.00281523	0.0178993	0.0144511	HMGA1/CDKN2A	2	CC
GO:0071953	elastic fiber	2/411	4/18675	0.00281523	0.0178993	0.0144511	ELN/MFAP4	2	CC
GO:0042023	DNA endoreduplication	3/401	10/17910	0.00118908	0.0179389	0.0155337	E2F8/E2F7/FBXO5	3	BP
GO:0043207	response to external biotic stimulus	35/401	905/17910	0.00120612	0.01814	0.0157079	MMP12/FGB/HMGA1/FOSL1/COCH/CXCL10/C15orf48/APOBEC3B/STMN1/PMAIP1/KRT6A/CXCL8/ABCC2/HMGB2/SKP2/GJB2/JCHAIN/C3/MACROD2/IL33/LPL/SPINK5/SCN7A/CLU/HPGD/VEGFD/SLPI/ALPL/DMBT1/CD207/GKN2/PLA2G1B/SFTPD/SCGB1A1/PGC	35	BP
GO:0031109	microtubule polymerization or depolymerization	8/401	94/17910	0.00122509	0.0183688	0.015906	KIF2C/KIF18B/SKA1/SKA3/STMN1/PSRC1/KIF18A/FBXO5	8	BP
GO:1903561	extracellular vesicle	67/411	2185/18675	0.00305564	0.0191485	0.0154597	CDK1/SLC2A1/FGB/RACGAP1/GGH/PFN2/ATAD2/PSAT1/GNG4/PLOD2/DSP/STMN1/SLC7A5/TXNRD1/MELTF/KRT6A/SLC16A1/PFKP/SNCG/ORM1/JCHAIN/C3/APOD/BMP3/SLC44A4/MUC1/DES/TSPAN8/PTGDS/SERPIND1/CLEC3B/GPRC5C/WFDC2/CPB2/B3GNT8/FCGBP/AQP1/MGP/SPINK1/IGHD/CLU/HPGD/CTSH/CRTAC1/TMPRSS2/LRRK2/RNASE1/ALOX15B/SLPI/GGT6/C1orf116/SCNN1B/CRYM/ALPL/SELENBP1/DMBT1/C7/AQP5/SLC26A9/SUSD2/PEBP4/SCGB1A1/FOLR1/PIGR/NAPSA/SCGB3A1/C16o…	67	CC
GO:0090543	Flemming body	4/411	28/18675	0.0031152	0.0191485	0.0154597	CEP55/KIF23/KIF14/RACGAP1	4	CC
GO:0043230	extracellular organelle	67/411	2187/18675	0.00312325	0.0191485	0.0154597	CDK1/SLC2A1/FGB/RACGAP1/GGH/PFN2/ATAD2/PSAT1/GNG4/PLOD2/DSP/STMN1/SLC7A5/TXNRD1/MELTF/KRT6A/SLC16A1/PFKP/SNCG/ORM1/JCHAIN/C3/APOD/BMP3/SLC44A4/MUC1/DES/TSPAN8/PTGDS/SERPIND1/CLEC3B/GPRC5C/WFDC2/CPB2/B3GNT8/FCGBP/AQP1/MGP/SPINK1/IGHD/CLU/HPGD/CTSH/CRTAC1/TMPRSS2/LRRK2/RNASE1/ALOX15B/SLPI/GGT6/C1orf116/SCNN1B/CRYM/ALPL/SELENBP1/DMBT1/C7/AQP5/SLC26A9/SUSD2/PEBP4/SCGB1A1/FOLR1/PIGR/NAPSA/SCGB3A1/C16o…	67	CC
GO:1901700	response to oxygen-containing compound	53/401	1551/17910	0.001288	0.019253	0.0166716	CDC6/CCNA2/CDK1/CCNB1/MMP12/SLC2A1/CTSV/CDT1/GGH/E2F1/ECT2/RAD51/TYMS/BRCA1/FOSL1/CXCL10/GCLC/EIF4EBP1/EZH2/GAL/TIMELESS/KIF18A/STC1/BRIP1/AKR1B10/CXCL8/ABCC2/STC2/BLM/HMGB2/SPHK1/GJB2/APOD/LPL/CPB2/KLF15/AQP1/KCNQ1/DUOX1/AGER/CLU/HPGD/CTSH/PPP1R1B/LRRK2/SLPI/FOXA2/AQP3/ALPL/CLDN18/PLA2G1B/SCGB1A1/FOLR1	53	BP
GO:0033273	response to vitamin	8/401	95/17910	0.00131217	0.0194815	0.0168694	TYMS/CXCL10/STC1/BRIP1/STC2/AQP3/ALPL/FOLR1	8	BP
GO:0031639	plasminogen activation	4/401	22/17910	0.00131524	0.0194815	0.0168694	FGB/MELTF/CLEC3B/CPB2	4	BP
GO:1903429	regulation of cell maturation	4/401	22/17910	0.00131524	0.0194815	0.0168694	AURKA/KIF14/GAL/LRRK2	4	BP
GO:0009628	response to abiotic stimulus	43/401	1191/17910	0.00133946	0.0197804	0.0171283	AURKB/CCNA2/PBK/CCNB1/SLC2A1/RAD54L/RAD51AP1/PCLAF/DTL/E2F1/CHEK1/ECT2/RAD51/CDC25A/PLOD2/XRCC2/COL11A1/BRCA1/FOSL1/CXCL10/GCLC/FEN1/EIF4EBP1/TICRR/EGLN3/PMAIP1/TIMELESS/STC1/HILPDA/BRIP1/ABCC2/STC2/BLM/NMU/LPL/CPB2/NDNF/AQP1/AGER/PPP1R1B/MFAP4/AQP3/AQP5	43	BP
GO:0062023	collagen-containing extracellular matrix	18/411	399/18675	0.00337898	0.0204727	0.0165288	FGB/COL11A1/COCH/GREM1/CTHRC1/ORM1/LGALS4/CLEC3B/ADAMTS8/SHH/MMP28/PRG4/MGP/CLU/CTSH/ELN/MFAP4/SLPI	18	CC
GO:0097327	response to antineoplastic agent	8/401	96/17910	0.00140411	0.0206725	0.0179008	RAD51/BRCA1/EIF4EBP1/TIMELESS/ABCC2/BLM/GJB2/AQP1	8	BP
GO:0036294	cellular response to decreased oxygen levels	13/401	220/17910	0.00142419	0.0209052	0.0181023	CCNA2/CCNB1/E2F1/EIF4EBP1/EGLN3/PMAIP1/STC1/HILPDA/BRIP1/STC2/NDNF/AQP1/AQP3	13	BP
GO:0006959	humoral immune response	15/401	276/17910	0.00146652	0.0211854	0.0183449	EXO1/FGB/KRT6A/JCHAIN/C3/CPB2/SPINK5/CLU/SLPI/DMBT1/C7/PLA2G1B/C4BPA/SFTPD/PGC	15	BP
GO:0007056	spindle assembly involved in female meiosis	2/401	3/17910	0.00147795	0.0211854	0.0183449	AURKA/FBXO5	2	BP
GO:0032954	regulation of cytokinetic process	2/401	3/17910	0.00147795	0.0211854	0.0183449	ECT2/KIF20B	2	BP
GO:0034421	post-translational protein acetylation	2/401	3/17910	0.00147795	0.0211854	0.0183449	DSCC1/ESCO2	2	BP
GO:0035986	senescence-associated heterochromatin focus assembly	2/401	3/17910	0.00147795	0.0211854	0.0183449	HMGA1/CDKN2A	2	BP
GO:0044752	response to human chorionic gonadotropin	2/401	3/17910	0.00147795	0.0211854	0.0183449	GCLC/GJB2	2	BP
GO:0071930	negative regulation of transcription involved in G1/S transition of mitotic cell cycle	2/401	3/17910	0.00147795	0.0211854	0.0183449	E2F1/E2F7	2	BP
GO:1905463	negative regulation of DNA duplex unwinding	2/401	3/17910	0.00147795	0.0211854	0.0183449	TOP2A/MCM2	2	BP
GO:0000307	cyclin-dependent protein kinase holoenzyme complex	4/411	29/18675	0.00355172	0.021269	0.0171717	CCNA2/CDK1/CCNB1/CCNE1	4	CC
GO:0097617	annealing activity	3/390	10/16967	0.00128234	0.0213043	0.0188056	RAD54L/RECQL4/BLM	3	MF
GO:0033280	response to vitamin D	5/401	38/17910	0.00149921	0.0214274	0.0185545	CXCL10/STC1/STC2/AQP3/ALPL	5	BP
GO:0044257	cellular protein catabolic process	27/401	648/17910	0.00153445	0.0218671	0.0189352	UBE2C/CDC20/AURKB/PBK/CDK1/CCNB1/PLK1/BUB1B/AURKA/MAD2L1/UHRF1/KIF14/UCHL1/DTL/UBE2S/PTTG1/GCLC/PMAIP1/FBXO5/SKP2/CCNF/ECRG4/IL33/SHH/CLU/SPATA18/LRRK2	27	BP
GO:0031396	regulation of protein ubiquitination	12/401	196/17910	0.00159266	0.0225203	0.0195009	UBE2C/CDC20/PLK1/MAD2L1/UBE2S/BRCA1/FANCI/GCLC/SPHK1/FBXO5/SKP2/LRRK2	12	BP
GO:0010755	regulation of plasminogen activation	3/401	11/17910	0.00160794	0.0225203	0.0195009	MELTF/CLEC3B/CPB2	3	BP
GO:0019755	one-carbon compound transport	3/401	11/17910	0.00160794	0.0225203	0.0195009	AQP1/AQP3/AQP5	3	BP
GO:0031507	heterochromatin assembly	3/401	11/17910	0.00160794	0.0225203	0.0195009	HMGA1/HELLS/CDKN2A	3	BP
GO:0035404	histone-serine phosphorylation	3/401	11/17910	0.00160794	0.0225203	0.0195009	AURKB/CCNB1/AURKA	3	BP
GO:0050930	induction of positive chemotaxis	3/401	11/17910	0.00160794	0.0225203	0.0195009	CXCL8/AGER/VEGFD	3	BP
GO:0007018	microtubule-based movement	13/401	224/17910	0.00167299	0.0233645	0.0202318	KIF2C/KIF4A/DLGAP5/KIF23/KIF11/UCHL1/RACGAP1/KIF15/CENPE/KIF1A/KIF18A/KIF3C/CFAP221	13	BP
GO:0009617	response to bacterium	25/401	588/17910	0.00172963	0.0240867	0.0208573	FGB/COCH/CXCL10/C15orf48/KRT6A/CXCL8/ABCC2/HMGB2/GJB2/JCHAIN/C3/MACROD2/LPL/SPINK5/SCN7A/HPGD/VEGFD/SLPI/ALPL/DMBT1/GKN2/PLA2G1B/SFTPD/SCGB1A1/PGC	25	BP
GO:0048232	male gamete generation	23/401	525/17910	0.00178789	0.0248273	0.0214985	TRIP13/KIFC1/CCNB1/ASPM/CTSV/ASF1B/RACGAP1/CIP2A/CDC25C/E2F1/RPL39L/PTTG1/POC1A/KNL1/TESMIN/KIF18A/BRIP1/HMGB2/TSPAN8/WFDC2/SPINK1/ROS1/LRRK2	23	BP
GO:0008309	double-stranded DNA exodeoxyribonuclease activity	2/390	3/16967	0.00155696	0.025292	0.0223256	EXO1/FEN1	2	MF
GO:0046697	decidualization	4/401	24/17910	0.00184429	0.0255379	0.0221138	CTSV/STC1/STC2/GJB2	4	BP
GO:0010824	regulation of centrosome duplication	5/401	40/17910	0.00189483	0.0261636	0.0226557	PLK4/BRCA1/STIL/POC1A/CCNF	5	BP
GO:0051704	multi-organism process	77/401	2496/17910	0.00191777	0.0264058	0.0228654	TOP2A/CENPA/TRIP13/CCNA2/NCAPH/KIFC1/TTK/CDK1/CCNB1/BUB1/PLK1/MMP12/AURKA/SLC2A1/ASPM/CTSV/KPNA2/FGB/ASF1B/RACGAP1/CIP2A/CDC25C/CENPU/E2F1/RPL39L/TYMS/HMGA1/PTTG1/FOSL1/COCH/CXCL10/C15orf48/APOBEC3B/STMN1/POC1A/KNL1/PMAIP1/KRT6A/TESMIN/KIF18A/STC1/BRIP1/CXCL8/ABCC2/STC2/HMGB2/FBXO5/SKP2/CLGN/GJB2/JCHAIN/C3/MACROD2/TSPAN8/IL33/LPL/WFDC2/AQP1/SPINK5/SCN7A/SPINK1/CLU/HPGD/ROS1/PPP1R1B/TMPRSS2/LRRK2/…	77	BP
GO:2001021	negative regulation of response to DNA damage stimulus	7/401	79/17910	0.00194316	0.0266802	0.023103	AUNIP/DDIAS/POLQ/PARPBP/FBXO5/MUC1/CLU	7	BP
GO:0005638	lamin filament	2/411	5/18675	0.00462378	0.0270596	0.0218468	LMNB1/LMNB2	2	CC
GO:0065010	extracellular membrane-bounded organelle	2/411	5/18675	0.00462378	0.0270596	0.0218468	AQP1/ALPL	2	CC
GO:0009314	response to radiation	20/401	435/17910	0.00200609	0.0274343	0.023756	AURKB/PBK/RAD54L/RAD51AP1/PCLAF/DTL/CHEK1/ECT2/RAD51/CDC25A/XRCC2/BRCA1/CXCL10/FEN1/TICRR/BLM/NMU/AQP1/PPP1R1B/MFAP4	20	BP
GO:0051298	centrosome duplication	6/401	59/17910	0.00200931	0.0274343	0.023756	PLK4/BRCA1/STIL/POC1A/WDR62/CCNF	6	BP
GO:0035371	microtubule plus-end	3/411	16/18675	0.0047879	0.0277053	0.0223681	KIF2C/KIF18B/SPAG5	3	CC
GO:0006690	icosanoid metabolic process	8/401	102/17910	0.00206854	0.0281644	0.0243882	PTGDS/PLA2G4F/HPGD/ALOX15B/GGT6/PLA2G10/PLA2G1B/GGTLC1	8	BP
GO:0060707	trophoblast giant cell differentiation	3/401	12/17910	0.00210849	0.0286287	0.0247902	PLK4/E2F8/E2F7	3	BP
GO:0090224	regulation of spindle organization	5/401	41/17910	0.00211896	0.0286911	0.0248443	TPX2/PLK1/SPAG5/TACC3/PSRC1	5	BP
GO:0001556	oocyte maturation	4/401	25/17910	0.00215721	0.0291283	0.0252228	TRIP13/CCNB1/AURKA/FBXO5	4	BP
GO:0045860	positive regulation of protein kinase activity	22/401	501/17910	0.00216843	0.0291992	0.0252842	TPX2/CDC6/CDK1/CCNB1/IQGAP3/KIF14/CLSPN/CENPE/ECT2/NCAPG2/EZH2/CKS2/PSRC1/CKS1B/GREM1/DBF4/GPRC5C/CXCL17/AGER/CLU/LRRK2/PLA2G1B	22	BP
GO:0007568	aging	16/401	318/17910	0.00227322	0.0305261	0.0264333	FOXM1/AURKB/CDK1/CTSV/RAD54L/CHEK1/TYMS/HMGA1/GCLC/CDKN2A/FBXO5/GJB2/APOD/ECRG4/AGER/LRRK2	16	BP
GO:1903322	positive regulation of protein modification by small protein conjugation or removal	9/401	128/17910	0.00236917	0.0317274	0.0274735	UBE2C/CDC20/PLK1/UBE2S/BRCA1/FANCI/SPHK1/SKP2/LRRK2	9	BP
GO:0042044	fluid transport	4/401	26/17910	0.00250491	0.0334535	0.0289682	AQP1/AQP3/AQP4/AQP5	4	BP
GO:0060249	anatomical structure homeostasis	19/401	413/17910	0.00255579	0.0340401	0.0294761	NEK2/AURKB/EXO1/CCNE1/RECQL4/RAD51/RFC4/FEN1/POLE2/BLM/PRIM1/PIF1/JCHAIN/CTSH/ADGRF5/CLDN18/SFTPD/PIGR/NAPSA	19	BP
GO:0007283	spermatogenesis	22/401	508/17910	0.00256847	0.034116	0.0295419	TRIP13/KIFC1/CCNB1/ASPM/CTSV/ASF1B/RACGAP1/CIP2A/CDC25C/E2F1/RPL39L/PTTG1/POC1A/KNL1/TESMIN/BRIP1/HMGB2/TSPAN8/WFDC2/SPINK1/ROS1/LRRK2	22	BP
GO:0007585	respiratory gaseous exchange	6/401	62/17910	0.00259202	0.0343354	0.0297318	ELN/SFTPD/SFTPA2/SFTPA1/SFTPC/SFTPB	6	BP
GO:0071695	anatomical structure maturation	10/401	155/17910	0.00261559	0.034554	0.0299211	TRIP13/CCNB1/AURKA/TYMS/GAL/GREM1/FBXO5/C3/SPINK5/LRRK2	10	BP
GO:0010604	positive regulation of macromolecule metabolic process	90/401	3041/17910	0.00262869	0.0346335	0.02999	MYBL2/UBE2C/TPX2/CDC20/TOP2A/DLGAP5/FOXM1/NEK2/AURKB/CDC6/CCNA2/TTK/CDK1/CCNB1/PLK1/MMP12/AURKA/CCNE1/FGB/IQGAP3/CDT1/UHRF1/KIF14/CDCA2/DSCC1/PFN2/DTL/E2F1/CLSPN/CENPE/CHEK1/UBE2S/ATAD2/ECT2/RAD51/HMGA1/NCAPG2/BRCA1/FOSL1/FANCI/E2F8/RFC4/CXCL10/GCLC/ARNTL2/EZH2/CKS2/EGLN3/CDC7/PMAIP1/PSRC1/CKS1B/E2F2/MELTF/GAL/GREM1/TIMELESS/E2F7/DBF4/SEMA3A/BLM/HMGB2/SPHK1/SKP2/C3/HAS3/MUC1/ZNF750/CLEC3B/PRDM16/…	90	BP
GO:0001833	inner cell mass cell proliferation	3/401	13/17910	0.0026958	0.0353273	0.0305907	GINS1/NCAPG2/GINS4	3	BP
GO:0062033	positive regulation of mitotic sister chromatid segregation	3/401	13/17910	0.0026958	0.0353273	0.0305907	DLGAP5/ESPL1/CDT1	3	BP
GO:0071453	cellular response to oxygen levels	13/401	237/17910	0.00274214	0.0358385	0.0310333	CCNA2/CCNB1/E2F1/EIF4EBP1/EGLN3/PMAIP1/STC1/HILPDA/BRIP1/STC2/NDNF/AQP1/AQP3	13	BP
GO:0071900	regulation of protein serine/threonine kinase activity	21/401	479/17910	0.00276213	0.0360034	0.0311762	CDKN3/CDC6/CDK1/CCNB1/PLK1/IQGAP3/UCHL1/PKMYT1/CDC25C/CDC25A/EZH2/CKS2/PSRC1/CKS1B/CDKN2A/DBF4/BLM/CXCL17/AGER/LRRK2/PLA2G1B	21	BP
GO:1990939	ATP-dependent microtubule motor activity	3/390	12/16967	0.00227186	0.0361028	0.0318684	KIF14/KIF18A/KIF20B	3	MF
GO:0031325	positive regulation of cellular metabolic process	89/401	3007/17910	0.00278617	0.0362202	0.0313639	MYBL2/UBE2C/TPX2/CDC20/TOP2A/DLGAP5/FOXM1/NEK2/AURKB/CDC6/CCNA2/TTK/CDK1/CCNB1/PLK1/MMP12/AURKA/CCNE1/FGB/IQGAP3/CDT1/UHRF1/KIF14/CDCA2/DSCC1/PFN2/E2F1/CLSPN/CENPE/CHEK1/UBE2S/ATAD2/ECT2/RAD51/HMGA1/NCAPG2/BRCA1/FOSL1/FANCI/E2F8/RFC4/CXCL10/GCLC/ARNTL2/EZH2/CKS2/EGLN3/CDC7/PMAIP1/PSRC1/CKS1B/E2F2/MELTF/GAL/GREM1/TIMELESS/E2F7/DBF4/SEMA3A/BLM/HMGB2/SPHK1/SKP2/C3/HAS3/MUC1/ZNF750/CLEC3B/PRDM16/IL33…	89	BP
GO:0031904	endosome lumen	4/411	34/18675	0.00636227	0.0364063	0.0293929	CTSH/NAPSA/SFTPC/SFTPB	4	CC
GO:0006468	protein phosphorylation	59/401	1835/17910	0.0028096	0.0364279	0.0315438	TPX2/BIRC5/MELK/FOXM1/NEK2/AURKB/CDKN3/CDC6/CCNA2/CCNB2/TTK/PBK/CDK1/CCNB1/BUB1/PLK1/BUB1B/AURKA/FAM83D/CCNE1/FGB/IQGAP3/KIF14/UCHL1/PKMYT1/CDC25C/PFN2/CLSPN/CENPE/CHEK1/ECT2/PLK4/CDC25A/NCAPG2/CXCL10/EZH2/CKS2/PSRC1/CKS1B/HASPIN/GREM1/CDKN2A/DBF4/SEMA3A/BLM/SPHK1/CCNF/C3/GPRC5C/LMO3/SPINK1/CXCL17/AGER/CLU/ROS1/CTSH/PPP1R1B/LRRK2/PLA2G1B	59	BP
GO:0032201	telomere maintenance via semi-conservative replication	4/401	27/17910	0.00288923	0.0364713	0.0315813	RFC4/FEN1/POLE2/PRIM1	4	BP
GO:0009725	response to hormone	34/401	919/17910	0.00289827	0.0364713	0.0315813	CDC6/CCNA2/SLC2A1/CTSV/CCNE1/FGB/GGH/TYMS/BRCA1/FOSL1/GCLC/EIF4EBP1/EZH2/GAL/KIF18A/STC1/BRIP1/ABCC2/STC2/HMGB2/SKP2/GJB2/SCGB2A1/LPL/KLF15/AQP1/NKX2-1/LMO3/HPGD/CTSH/ABCA3/ALPL/PLA2G1B/SCGB1A1	34	BP
GO:0002784	regulation of antimicrobial peptide production	2/401	4/17910	0.00291207	0.0364713	0.0315813	SPINK5/PGC	2	BP
GO:0002786	regulation of antibacterial peptide production	2/401	4/17910	0.00291207	0.0364713	0.0315813	SPINK5/PGC	2	BP
GO:0007079	mitotic chromosome movement towards spindle pole	2/401	4/17910	0.00291207	0.0364713	0.0315813	DLGAP5/CENPE	2	BP
GO:0009992	cellular water homeostasis	2/401	4/17910	0.00291207	0.0364713	0.0315813	AQP4/SCTR	2	BP
GO:0015670	carbon dioxide transport	2/401	4/17910	0.00291207	0.0364713	0.0315813	AQP1/AQP5	2	BP
GO:0033314	mitotic DNA replication checkpoint	2/401	4/17910	0.00291207	0.0364713	0.0315813	CLSPN/TICRR	2	BP
GO:0072757	cellular response to camptothecin	2/401	4/17910	0.00291207	0.0364713	0.0315813	RAD51/BLM	2	BP
GO:1905340	regulation of protein localization to kinetochore	2/401	4/17910	0.00291207	0.0364713	0.0315813	NDC80/CDT1	2	BP
GO:1905342	positive regulation of protein localization to kinetochore	2/401	4/17910	0.00291207	0.0364713	0.0315813	NDC80/CDT1	2	BP
GO:1905867	epididymis development	2/401	4/17910	0.00291207	0.0364713	0.0315813	GJB2/GJB1	2	BP
GO:1990086	lens fiber cell apoptotic process	2/401	4/17910	0.00291207	0.0364713	0.0315813	E2F1/E2F2	2	BP
GO:0050715	positive regulation of cytokine secretion	9/401	132/17910	0.0029174	0.0364713	0.0315813	MMP12/ORM1/IL33/LPL/IGHD/AGER/LRRK2/CHIA/ALOX15B	9	BP
GO:0010972	negative regulation of G2/M transition of mitotic cell cycle	7/401	85/17910	0.00295231	0.0368135	0.0318777	AURKB/CDK1/AURKA/CLSPN/BRCA1/TICRR/BLM	7	BP
GO:0030141	secretory granule	29/411	806/18675	0.0066987	0.0379102	0.0306071	CTSV/FGB/RACGAP1/GGH/DSP/KNL1/LY6K/HILPDA/GZMB/ORM1/C3/CLEC3B/SPINK5/CLU/CTSH/ABCA3/PCSK2/VEGFD/SLPI/SFTA3/DMBT1/PLA2G1B/SCGB1A1/SFTPA2/PIGR/SFTPA1/NAPSA/SFTPC/SFTPB	29	CC
GO:0048145	regulation of fibroblast proliferation	7/401	86/17910	0.00315352	0.0392224	0.0339635	CDC6/CCNA2/CCNB1/E2F1/SPHK1/AQP1/PLA2G1B	7	BP
GO:0032154	cleavage furrow	5/411	55/18675	0.00711055	0.0398036	0.0321358	CEP55/KIF20A/RACGAP1/ECT2/PLK4	5	CC
GO:0034698	response to gonadotropin	4/401	28/17910	0.003312	0.0407972	0.0353272	CCNA2/CTSV/GCLC/GJB2	4	BP
GO:0051443	positive regulation of ubiquitin-protein transferase activity	4/401	28/17910	0.003312	0.0407972	0.0353272	UBE2C/CDC20/PLK1/UBE2S	4	BP
GO:0071168	protein localization to chromatin	4/401	28/17910	0.003312	0.0407972	0.0353272	CDCA5/PLK1/EZH2/ESCO2	4	BP
GO:0032434	regulation of proteasomal ubiquitin-dependent protein catabolic process	8/401	110/17910	0.00331352	0.0407972	0.0353272	PBK/PLK1/AURKA/GCLC/IL33/SHH/CLU/LRRK2	8	BP
GO:0048144	fibroblast proliferation	7/401	87/17910	0.00336503	0.0413273	0.0357862	CDC6/CCNA2/CCNB1/E2F1/SPHK1/AQP1/PLA2G1B	7	BP
GO:0046606	negative regulation of centrosome cycle	3/401	14/17910	0.00337446	0.0413393	0.0357966	NEK2/BRCA1/CCNF	3	BP
GO:0007584	response to nutrient	12/401	215/17910	0.00342067	0.0417815	0.0361796	TYMS/CXCL10/GCLC/STC1/BRIP1/SLC16A1/STC2/LPL/FOXA2/AQP3/ALPL/FOLR1	12	BP
GO:0035690	cellular response to drug	17/401	362/17910	0.00342766	0.0417815	0.0361796	CCNA2/CDK1/ECT2/RAD51/BRCA1/GCLC/EIF4EBP1/EZH2/TIMELESS/ABCC2/BLM/SPHK1/GJB2/AQP1/KCNQ1/LRRK2/FOLR1	17	BP
GO:0099503	secretory vesicle	32/411	923/18675	0.00765226	0.0423754	0.0342121	CTSV/FGB/RACGAP1/GGH/DSP/KIF1A/KNL1/LY6K/HILPDA/GZMB/ORM1/C3/CLEC3B/SPINK5/CLU/CTSH/ABCA3/PCSK2/LRRK2/VEGFD/SLPI/TMEM163/SFTA3/DMBT1/PLA2G1B/SCGB1A1/SFTPA2/PIGR/SFTPA1/NAPSA/SFTPC/SFTPB	32	CC
GO:0044085	cellular component biogenesis	87/401	2951/17910	0.00350932	0.0426706	0.0369494	MYBL2/UBE2C/TPX2/CDC20/ANLN/CENPA/HJURP/KIF4A/RRM2/NEK2/AURKB/TRIP13/KIFC1/CDK1/CCNB1/PLK1/KIF23/CENPF/SPAG5/EXO1/AURKA/KIF11/SLC2A1/TK1/ASPM/CENPW/FGB/CDT1/KIF14/ASF1B/RACGAP1/MCM2/CENPU/PFN2/CENPE/UBE2S/OIP5/ECT2/RAD51/CENPI/PLK4/HMGA1/BRCA1/FOSL1/CENPM/STIL/EIF4EBP1/STMN1/POLQ/POC1A/KNL1/TICRR/CENPK/DIAPH3/PMAIP1/PSRC1/GREM1/WDR62/CENPN/BRIP1/HELLS/CDKN2A/CENPH/KIF3C/BLM/CHAF1B/HMGB2/SPHK1/FBX…	87	BP
GO:0031638	zymogen activation	5/401	46/17910	0.00353831	0.0429129	0.0371593	FGB/MELTF/CLEC3B/CPB2/CTSH	5	BP
GO:0043030	regulation of macrophage activation	6/401	66/17910	0.00355559	0.0429129	0.0371593	SPHK1/IL33/AGER/LRRK2/ADGRF5/PLA2G10	6	BP
GO:2000573	positive regulation of DNA biosynthetic process	6/401	66/17910	0.00355559	0.0429129	0.0371593	NEK2/AURKB/DSCC1/RFC4/GREM1/PARM1	6	BP
GO:0048608	reproductive structure development	19/401	426/17910	0.00358589	0.0430815	0.0373053	ASPM/CTSV/PLK4/FOSL1/SERPINB5/E2F8/KIF18A/STC1/BRIP1/E2F7/STC2/SEMA3A/HMGB2/CCNF/GJB2/SHH/NKX2-1/ALOX15B/GJB1	19	BP
GO:0007127	meiosis I	7/401	88/17910	0.00358719	0.0430815	0.0373053	TRIP13/PLK1/AURKA/ESPL1/CKS2/BRIP1/FBXO5	7	BP
GO:0031982	vesicle	103/411	3756/18675	0.00787238	0.0431306	0.0348218	KIFC1/CDK1/SLC2A1/CTSV/FGB/RACGAP1/GGH/PFN2/ATAD2/PSAT1/GNG4/PLOD2/DSP/STMN1/SLC7A5/TXNRD1/KIF1A/KNL1/LY6K/MELTF/KRT6A/HILPDA/GZMB/SLC16A1/PFKP/STEAP1/SPHK1/SNCG/ORM1/JCHAIN/C3/APOD/BMP3/SLC44A4/MUC1/DES/TSPAN8/PTGDS/SERPIND1/CLEC3B/IL33/GPRC5C/WFDC2/CD1E/CPB2/B3GNT8/FCGBP/HLA-DQB2/AQP1/MGP/KCNQ1/ACKR1/PARM1/SPINK5/CD1C/SPINK1/IGHD/CD1A/CLU/HSD17B6/HPGD/CTSH/CRTAC1/ABCA3/PCSK2/TMPRSS2/SLC34A2/LRR…	103	CC
GO:0043085	positive regulation of catalytic activity	44/401	1293/17910	0.00361722	0.0433357	0.0375253	UBE2C/TPX2/CDC20/NEK2/AURKB/CDC6/NCAPH/CDK1/CCNB1/DEPDC1/PLK1/DEPDC1B/IQGAP3/UHRF1/KIF14/RACGAP1/DSCC1/ARHGAP11A/PFN2/CLSPN/CENPE/UBE2S/ECT2/NCAPG2/RFC4/EZH2/CKS2/EGLN3/PMAIP1/PSRC1/CKS1B/GREM1/DBF4/HMGB2/DLC1/GPRC5C/PARM1/CXCL17/AGER/CLU/CTSH/RAP1GAP/LRRK2/PLA2G1B	44	BP
GO:0003682	chromatin binding	20/390	437/16967	0.00283933	0.0441606	0.0389811	TOP2A/CENPA/CDCA5/CDK1/CENPF/EXO1/UBE2T/CDT1/UHRF1/ORC1/PCLAF/RAD51/HMGA1/EZH2/CKS2/POLQ/TICRR/BRIP1/CHAF1B/ZNF750	20	MF
GO:0009411	response to UV	9/401	137/17910	0.0037385	0.0446791	0.0386887	AURKB/PBK/PCLAF/DTL/CHEK1/CDC25A/FEN1/AQP1/MFAP4	9	BP
GO:0003777	microtubule motor activity	5/390	43/16967	0.00293619	0.0447158	0.0394712	KIFC1/KIF14/CENPE/KIF18A/KIF20B	5	MF
GO:0061821	telomeric D-loop binding	2/390	4/16967	0.00306654	0.0448328	0.0395745	RECQL4/BLM	2	MF
GO:0062037	D-loop DNA binding	2/390	4/16967	0.00306654	0.0448328	0.0395745	RECQL4/BLM	2	MF
GO:0071549	cellular response to dexamethasone stimulus	4/401	29/17910	0.00377499	0.0450053	0.0389711	EIF4EBP1/ABCC2/GJB2/AQP1	4	BP
GO:0061458	reproductive system development	19/401	429/17910	0.00386718	0.0459922	0.0398257	ASPM/CTSV/PLK4/FOSL1/SERPINB5/E2F8/KIF18A/STC1/BRIP1/E2F7/STC2/SEMA3A/HMGB2/CCNF/GJB2/SHH/NKX2-1/ALOX15B/GJB1	19	BP
GO:0009719	response to endogenous stimulus	51/401	1560/17910	0.0039527	0.0468952	0.0406076	CDC6/CCNA2/SLC2A1/CTSV/CCNE1/FGB/GGH/E2F1/SHCBP1/RAD51/TYMS/EME1/BRCA1/FOSL1/GCLC/EIF4EBP1/EZH2/MCM7/GAL/GREM1/TIMELESS/PEG10/KIF18A/STC1/BRIP1/CXCL8/ABCC2/STC2/BLM/HMGB2/SKP2/GJB2/SCGB2A1/CLEC3B/PRDM16/LPL/KLF15/AQP1/KCNQ1/NKX2-1/LMO3/AGER/HPGD/CTSH/ABCA3/CHRDL1/LRRK2/ALPL/PLA2G1B/SCGB1A1/FOLR1	51	BP
GO:0033365	protein localization to organelle	30/401	798/17910	0.00401412	0.0475086	0.0411388	CENPA/AURKB/CDCA5/TTK/CDK1/NDC80/PLK1/MMP12/SPAG5/BUB1B/AURKA/FAM83D/GTSE1/KPNA2/CDT1/E2F1/ECT2/STIL/EZH2/KNL1/PMAIP1/HASPIN/GZMB/KIF20B/ESCO2/APOD/SHH/CLU/LRRK2/CLDN18	30	BP
GO:0000790	nuclear chromatin	14/411	309/18675	0.00884328	0.0479399	0.0387046	CENPA/CDCA5/RAD51AP1/UHRF1/ASF1B/E2F1/RAD51/EME1/EZH2/TIMELESS/CHAF1B/HMGB2/ESCO2/MUC1	14	CC
GO:0030163	protein catabolic process	30/401	799/17910	0.00408618	0.0482445	0.041776	UBE2C/CDC20/AURKB/PBK/CDK1/CCNB1/PLK1/MMP12/BUB1B/AURKA/FAM83D/MAD2L1/UHRF1/KIF14/UCHL1/DTL/UBE2S/PTTG1/GCLC/PMAIP1/FBXO5/SKP2/CCNF/ECRG4/IL33/SHH/CLU/SPATA18/LRRK2/C4BPA	30	BP
GO:0042752	regulation of circadian rhythm	8/401	114/17910	0.00412194	0.0484882	0.0419871	TOP2A/CDK1/ARNTL2/EZH2/TIMELESS/NMU/PTGDS/NKX2-1	8	BP
GO:0032436	positive regulation of proteasomal ubiquitin-dependent protein catabolic process	6/401	68/17910	0.00412666	0.0484882	0.0419871	PLK1/AURKA/GCLC/IL33/CLU/LRRK2	6	BP
GO:0051972	regulation of telomerase activity	5/401	48/17910	0.00426207	0.0499592	0.0432608	NEK2/AURKB/GREM1/PIF1/PARM1	5	BP
GO:0021772	olfactory bulb development	4/401	30/17910	0.00427994	0.0500487	0.0433383	KIF14/SEMA3A/CRTAC1/LRRK2	4	BP
GO:0061982	meiosis I cell cycle process	7/401	91/17910	0.00432094	0.0503262	0.0435786	TRIP13/PLK1/AURKA/ESPL1/CKS2/BRIP1/FBXO5	7	BP
GO:0009991	response to extracellular stimulus	21/401	498/17910	0.00432426	0.0503262	0.0435786	SLC2A1/CTSV/TYMS/FOSL1/CXCL10/GCLC/EIF4EBP1/PMAIP1/STC1/BRIP1/SLC16A1/STC2/SKP2/LPL/LRRK2/FOXA2/AQP3/ALPL/SLC22A3/SCTR/FOLR1	21	BP
GO:0009636	response to toxic substance	21/401	499/17910	0.00442355	0.0513594	0.0444733	CDK1/CCNB1/GGH/ECT2/TYMS/FOSL1/EIF4EBP1/EZH2/TXNRD1/TIMELESS/BRIP1/AKR1B10/ABCC2/SPHK1/AQP1/DUOX1/HPGD/PPP1R1B/LRRK2/INMT/CLDN18	21	BP
GO:0048469	cell maturation	10/401	167/17910	0.0044558	0.0516113	0.0446914	TRIP13/CCNB1/AURKA/KIF14/TYMS/GAL/FBXO5/C3/SPINK1/LRRK2	10	BP
GO:0032270	positive regulation of cellular protein metabolic process	48/401	1458/17910	0.00452287	0.0522643	0.0452569	UBE2C/TPX2/CDC20/CDC6/TTK/CDK1/CCNB1/PLK1/AURKA/FGB/IQGAP3/UHRF1/KIF14/CDCA2/PFN2/CLSPN/CENPE/UBE2S/ECT2/NCAPG2/BRCA1/FANCI/GCLC/EZH2/CKS2/EGLN3/PMAIP1/PSRC1/CKS1B/MELTF/GREM1/DBF4/SEMA3A/SPHK1/SKP2/C3/MUC1/CLEC3B/IL33/DLC1/GPRC5C/CXCL17/AGER/CLU/CTSH/LRRK2/PLA2G10/PLA2G1B	48	BP
GO:1903320	regulation of protein modification by small protein conjugation or removal	12/401	223/17910	0.00457852	0.0527826	0.0457057	UBE2C/CDC20/PLK1/MAD2L1/UBE2S/BRCA1/FANCI/GCLC/SPHK1/FBXO5/SKP2/LRRK2	12	BP
GO:0048545	response to steroid hormone	17/401	374/17910	0.00474461	0.0538539	0.0466334	CTSV/CCNE1/TYMS/BRCA1/FOSL1/EIF4EBP1/STC1/ABCC2/HMGB2/SKP2/GJB2/SCGB2A1/AQP1/LMO3/ABCA3/ALPL/SCGB1A1	17	BP
GO:0010216	maintenance of DNA methylation	2/401	5/17910	0.00478163	0.0538539	0.0466334	UHRF1/HELLS	2	BP
GO:0010756	positive regulation of plasminogen activation	2/401	5/17910	0.00478163	0.0538539	0.0466334	MELTF/CLEC3B	2	BP
GO:0030174	regulation of DNA-dependent DNA replication initiation	2/401	5/17910	0.00478163	0.0538539	0.0466334	CDT1/TICRR	2	BP
GO:0031536	positive regulation of exit from mitosis	2/401	5/17910	0.00478163	0.0538539	0.0466334	UBE2C/CDCA5	2	BP
GO:0044314	protein K27-linked ubiquitination	2/401	5/17910	0.00478163	0.0538539	0.0466334	UBE2T/UBE2S	2	BP
GO:0060718	chorionic trophoblast cell differentiation	2/401	5/17910	0.00478163	0.0538539	0.0466334	E2F8/E2F7	2	BP
GO:1901563	response to camptothecin	2/401	5/17910	0.00478163	0.0538539	0.0466334	RAD51/BLM	2	BP
GO:1905448	positive regulation of mitochondrial ATP synthesis coupled electron transport	2/401	5/17910	0.00478163	0.0538539	0.0466334	CDK1/CCNB1	2	BP
GO:1905462	regulation of DNA duplex unwinding	2/401	5/17910	0.00478163	0.0538539	0.0466334	TOP2A/MCM2	2	BP
GO:0007099	centriole replication	4/401	31/17910	0.00482853	0.0540089	0.0467675	PLK4/BRCA1/STIL/WDR62	4	BP
GO:0021988	olfactory lobe development	4/401	31/17910	0.00482853	0.0540089	0.0467675	KIF14/SEMA3A/CRTAC1/LRRK2	4	BP
GO:1901976	regulation of cell cycle checkpoint	4/401	31/17910	0.00482853	0.0540089	0.0467675	CCNB1/NDC80/MAD2L1/CDT1	4	BP
GO:2001252	positive regulation of chromosome organization	10/401	169/17910	0.00484293	0.0540462	0.0467998	DLGAP5/NEK2/AURKB/CCNB1/ESPL1/CDT1/BRCA1/FEN1/MUC1/LRRK2	10	BP
GO:0042592	homeostatic process	55/401	1730/17910	0.00494825	0.0550958	0.0477087	UBE2C/NEK2/AURKB/CCNB2/EXO1/CCNE1/RECQL4/UBE2S/RAD51/NCAPG2/RFC4/CXCL10/GCLC/FEN1/STMN1/EZH2/POLE2/PMAIP1/MELTF/TESMIN/STC1/SLC16A1/ABCC2/STC2/BLM/STEAP1/NMU/PRIM1/HMGB2/PIF1/JCHAIN/PRDM16/LPL/SLC46A2/CPB2/KLF15/AQP1/SCN7A/AGER/CTSH/SLC34A2/LRRK2/ADGRF5/FOXA2/AQP3/SCNN1B/AQP4/PLA2G10/CLDN18/C7/SCTR/PLA2G1B/SFTPD/PIGR/NAPSA	55	BP
GO:0034622	cellular protein-containing complex assembly	34/401	952/17910	0.00499346	0.0554728	0.0480352	UBE2C/ANLN/CENPA/HJURP/CENPF/CENPW/FGB/CDT1/ASF1B/MCM2/CENPU/PFN2/CENPE/UBE2S/OIP5/RAD51/CENPI/CENPM/STMN1/KNL1/TICRR/CENPK/DIAPH3/PSRC1/GREM1/CENPN/HELLS/CENPH/CHAF1B/HMGB2/FBXO5/CLU/ELN/HOPX	34	BP
GO:0036149	phosphatidylinositol acyl-chain remodeling	3/401	16/17910	0.00502201	0.0556635	0.0482003	PLA2G4F/PLA2G10/PLA2G1B	3	BP
GO:1904951	positive regulation of establishment of protein localization	19/401	440/17910	0.00505998	0.0558618	0.048372	MMP12/GTSE1/FGB/E2F1/ECT2/PMAIP1/GZMB/KIF20B/NMU/ORM1/IL33/LPL/SHH/IGHD/AGER/LRRK2/CHIA/ALOX15B/PLA2G1B	19	BP
GO:0001774	microglial cell activation	5/401	50/17910	0.00508562	0.0558618	0.048372	SPHK1/IL33/AGER/CLU/LRRK2	5	BP
GO:0002269	leukocyte activation involved in inflammatory response	5/401	50/17910	0.00508562	0.0558618	0.048372	SPHK1/IL33/AGER/CLU/LRRK2	5	BP
GO:0036297	interstrand cross-link repair	5/401	50/17910	0.00508562	0.0558618	0.048372	UBE2T/RAD51AP1/RAD51/EME1/FANCI	5	BP
GO:0010212	response to ionizing radiation	9/401	144/17910	0.00518041	0.056522	0.0489437	RAD54L/RAD51AP1/ECT2/RAD51/XRCC2/BRCA1/CXCL10/TICRR/BLM	9	BP
GO:0035148	tube formation	9/401	144/17910	0.00518041	0.056522	0.0489437	STIL/GREM1/CTHRC1/KIF20B/DLC1/SHH/ATOH8/IRX2/FOLR1	9	BP
GO:0061351	neural precursor cell proliferation	9/401	144/17910	0.00518041	0.056522	0.0489437	MELK/ASPM/KIF14/RACGAP1/CIP2A/SHCBP1/KIF1A/SHH/LRRK2	9	BP
GO:0033674	positive regulation of kinase activity	22/401	541/17910	0.00539503	0.0587325	0.0508578	TPX2/CDC6/CDK1/CCNB1/IQGAP3/KIF14/CLSPN/CENPE/ECT2/NCAPG2/EZH2/CKS2/PSRC1/CKS1B/GREM1/DBF4/GPRC5C/CXCL17/AGER/CLU/LRRK2/PLA2G1B	22	BP
GO:0097421	liver regeneration	4/401	32/17910	0.00542242	0.0588995	0.0510024	AURKA/TYMS/EZH2/CPB2	4	BP
GO:0051247	positive regulation of protein metabolic process	50/401	1548/17910	0.00544503	0.059014	0.0511016	UBE2C/TPX2/CDC20/CDC6/TTK/CDK1/CCNB1/PLK1/AURKA/FGB/IQGAP3/UHRF1/KIF14/CDCA2/PFN2/DTL/CLSPN/CENPE/UBE2S/ECT2/NCAPG2/BRCA1/FANCI/GCLC/EZH2/CKS2/EGLN3/PMAIP1/PSRC1/CKS1B/MELTF/GREM1/DBF4/SEMA3A/SPHK1/SKP2/C3/MUC1/CLEC3B/IL33/DLC1/GPRC5C/CXCL17/AGER/CLU/CTSH/LRRK2/PLA2G10/PLA2G1B/C4BPA	50	BP
GO:0001932	regulation of protein phosphorylation	44/401	1324/17910	0.00551956	0.0596894	0.0516864	TPX2/FOXM1/CDKN3/CDC6/TTK/PBK/CDK1/CCNB1/PLK1/FAM83D/FGB/IQGAP3/KIF14/UCHL1/PKMYT1/CDC25C/PFN2/CLSPN/CENPE/ECT2/CDC25A/NCAPG2/CXCL10/EZH2/CKS2/PSRC1/CKS1B/GREM1/CDKN2A/DBF4/SEMA3A/BLM/SPHK1/C3/GPRC5C/LMO3/SPINK1/CXCL17/AGER/CLU/ROS1/PPP1R1B/LRRK2/PLA2G1B	44	BP
GO:0019900	kinase binding	26/390	647/16967	0.00426487	0.0611299	0.0539601	TPX2/TOP2A/FOXM1/AURKB/CDC6/CCNA2/CCNB1/PLK1/AURKA/FAM83D/KIF11/SLC2A1/KIF20A/PRC1/KIF14/RACGAP1/SGO1/CDC25C/E2F1/CDC25A/FAM83A/DSP/CDKN2A/FBXO5/KCNQ1/CHIA	26	MF
GO:0006928	movement of cell or subcellular component	62/401	2012/17910	0.00568273	0.0611931	0.0529885	ANLN/KIF2C/KIF4A/DLGAP5/CDK1/KIF23/MMP12/FAM83D/KIF11/GTSE1/ASPM/DEPDC1B/TNNT1/KIF14/UCHL1/RACGAP1/KIF15/PFN2/CENPE/DSP/CXCL10/STMN1/SLC7A5/KIF1A/GREM1/KIF18A/STC1/CTHRC1/SLC16A1/CXCL8/KIF20B/TUBB2B/KIF3C/SEMA3A/HMGB2/SPHK1/FBXO5/JCHAIN/APOD/DES/IL33/DLC1/CXCL14/NDNF/SHH/MMP28/KCNQ1/NKX2-1/DUOX1/CXCL17/AGER/ATOH8/CFAP221/CTSH/RAP1GAP/LRRK2/VEGFD/ALOX15B/PLA2G10/PLA2G1B/SFTPD/FOLR1	62	BP
GO:0065003	protein-containing complex assembly	55/401	1742/17910	0.00568889	0.0611931	0.0529885	UBE2C/ANLN/CENPA/HJURP/RRM2/CDK1/CCNB1/CENPF/SLC2A1/TK1/CENPW/FGB/CDT1/KIF14/ASF1B/MCM2/CENPU/PFN2/CENPE/UBE2S/OIP5/ECT2/RAD51/CENPI/HMGA1/FOSL1/CENPM/EIF4EBP1/STMN1/POLQ/KNL1/TICRR/CENPK/DIAPH3/PMAIP1/PSRC1/GREM1/CENPN/HELLS/CENPH/BLM/CHAF1B/HMGB2/FBXO5/KNTC1/CLGN/JCHAIN/CLU/ELN/LRRK2/AQP4/HOPX/GJB1/AQP5/FOLR1	55	BP
GO:0071478	cellular response to radiation	10/401	173/17910	0.00569617	0.0611931	0.0529885	AURKB/PBK/RAD51AP1/CHEK1/ECT2/RAD51/CDC25A/BLM/AQP1/MFAP4	10	BP
GO:0042116	macrophage activation	7/401	96/17910	0.00578889	0.0620528	0.053733	SPHK1/IL33/AGER/CLU/LRRK2/ADGRF5/PLA2G10	7	BP
GO:0071236	cellular response to antibiotic	9/401	147/17910	0.00591642	0.063281	0.0547965	CDK1/ECT2/EZH2/TIMELESS/SPHK1/PLA2G4F/AQP1/CLU/LRRK2	9	BP
GO:0006266	DNA ligation	3/401	17/17910	0.00599798	0.0634591	0.0549507	TOP2A/RAD51/HMGB2	3	BP
GO:0006978	DNA damage response, signal transduction by p53 class mediator resulting in transcription of p21 class mediator	3/401	17/17910	0.00599798	0.0634591	0.0549507	FOXM1/BRCA1/MUC1	3	BP
GO:0010744	positive regulation of macrophage derived foam cell differentiation	3/401	17/17910	0.00599798	0.0634591	0.0549507	LPL/ALOX15B/PLA2G10	3	BP
GO:0043171	peptide catabolic process	3/401	17/17910	0.00599798	0.0634591	0.0549507	CTSH/GGT6/GGTLC1	3	BP
GO:0097329	response to antimetabolite	3/401	17/17910	0.00599798	0.0634591	0.0549507	TIMELESS/ABCC2/BLM	3	BP
GO:0005664	nuclear origin of replication recognition complex	2/411	8/18675	0.0123917	0.0651197	0.0525749	ORC1/MCM2	2	CC
GO:0031390	Ctf18 RFC-like complex	2/411	8/18675	0.0123917	0.0651197	0.0525749	DSCC1/RFC4	2	CC
GO:0043203	axon hillock	2/411	8/18675	0.0123917	0.0651197	0.0525749	TPX2/AURKA	2	CC
GO:0043009	chordate embryonic development	23/401	581/17910	0.00616906	0.0651282	0.056396	NEK2/CCNB2/CCNB1/GINS1/ASF1B/CENPU/PLK4/XRCC2/NCAPG2/COL11A1/FOSL1/E2F8/STIL/GINS4/CTHRC1/E2F7/KIF20B/DLC1/SHH/SLC34A2/ADGRF5/HOPX/FOLR1	23	BP
GO:0051604	protein maturation	16/401	353/17910	0.006217	0.0654929	0.0567118	MAGEA3/FGB/MELTF/KLK6/C3/CLEC3B/CPB2/SHH/CLU/CTSH/PCSK2/TMPRSS2/LRRK2/CTSE/C7/C4BPA	16	BP
GO:0030104	water homeostasis	6/401	74/17910	0.00624732	0.0656707	0.0568658	STMN1/AQP1/AQP3/SCNN1B/AQP4/SCTR	6	BP
GO:0044093	positive regulation of molecular function	52/401	1636/17910	0.00629098	0.0659878	0.0571404	UBE2C/TPX2/CDC20/NEK2/AURKB/CDCA5/CDC6/NCAPH/CDK1/CCNB1/DEPDC1/PLK1/DEPDC1B/IQGAP3/CDT1/UHRF1/KIF14/RACGAP1/DSCC1/ARHGAP11A/PFN2/CLSPN/CENPE/UBE2S/ECT2/NCAPG2/FOSL1/RFC4/STMN1/EZH2/CKS2/EGLN3/PMAIP1/PSRC1/CKS1B/GAL/GREM1/CTHRC1/DBF4/HMGB2/SPHK1/DLC1/GPRC5C/SHH/PARM1/CXCL17/AGER/CLU/CTSH/RAP1GAP/LRRK2/PLA2G1B	52	BP
GO:0021700	developmental maturation	13/401	262/17910	0.00634795	0.0664428	0.0575343	CDC20/TRIP13/CCNB1/AURKA/KIF14/TYMS/GAL/GREM1/FBXO5/C3/SPINK5/SPINK1/LRRK2	13	BP
GO:0001666	response to hypoxia	16/401	354/17910	0.00638204	0.0666569	0.0577197	CCNA2/CCNB1/SLC2A1/E2F1/PLOD2/EIF4EBP1/EGLN3/PMAIP1/STC1/HILPDA/BRIP1/STC2/NDNF/AQP1/AGER/AQP3	16	BP
GO:0009790	embryo development	34/401	968/17910	0.00640187	0.0667214	0.0577756	TOP2A/NEK2/CCNB2/CDK1/CCNB1/GINS1/ASF1B/RACGAP1/CENPU/PLK4/XRCC2/NCAPG2/COL11A1/FOSL1/E2F8/STIL/TXNRD1/GINS4/GREM1/CTHRC1/E2F7/CXCL8/KIF20B/SEMA3A/SLC44A4/DLC1/SHH/ATOH8/IRX2/SLC34A2/ADGRF5/FOXA2/HOPX/FOLR1	34	BP
GO:0009986	cell surface	24/411	667/18675	0.0129892	0.0675701	0.0545533	CTSV/HMMR/FGB/CXCL10/MELTF/GREM1/HILPDA/ABCC2/C3/TSPAN8/LPL/SLC46A2/SHH/DUOX1/AGER/CLU/ROS1/ADGRF5/SCNN1B/AQP4/FCER1A/PLA2G1B/SLC26A9/FOLR1	24	CC
GO:0045861	negative regulation of proteolysis	15/401	324/17910	0.00658129	0.0684454	0.0592684	BIRC5/PBK/MAGEA3/PTTG1/C3/WFDC2/CPB2/SHH/CPAMD8/AQP1/SPINK5/SPINK1/LRRK2/SLPI/C4BPA	15	BP
GO:0031100	animal organ regeneration	6/401	75/17910	0.00666572	0.0691763	0.0599013	CCNA2/CDK1/AURKA/TYMS/EZH2/CPB2	6	BP
GO:0031401	positive regulation of protein modification process	38/401	1117/17910	0.00674102	0.0697794	0.0604236	UBE2C/TPX2/CDC20/CDC6/TTK/CDK1/CCNB1/PLK1/FGB/IQGAP3/KIF14/CDCA2/PFN2/CLSPN/CENPE/UBE2S/ECT2/NCAPG2/BRCA1/FANCI/EZH2/CKS2/PSRC1/CKS1B/GREM1/DBF4/SEMA3A/SPHK1/SKP2/C3/MUC1/DLC1/GPRC5C/CXCL17/AGER/CLU/LRRK2/PLA2G1B	38	BP
GO:0007019	microtubule depolymerization	4/401	34/17910	0.00675238	0.0697794	0.0604236	KIF2C/KIF18B/STMN1/KIF18A	4	BP
GO:0022412	cellular process involved in reproduction in multicellular organism	15/401	326/17910	0.00694919	0.0700495	0.0606574	TOP2A/TRIP13/NCAPH/TTK/CCNB1/PLK1/AURKA/ASPM/FOSL1/KNL1/KIF18A/BRIP1/HMGB2/FBXO5/SPINK1	15	BP
GO:0001890	placenta development	9/401	151/17910	0.00702022	0.0700495	0.0606574	CTSV/PLK4/FOSL1/E2F8/STC1/E2F7/STC2/CCNF/GJB2	9	BP
GO:0071385	cellular response to glucocorticoid stimulus	5/401	54/17910	0.00705986	0.0700495	0.0606574	EIF4EBP1/STC1/ABCC2/GJB2/AQP1	5	BP
GO:0002759	regulation of antimicrobial humoral response	2/401	6/17910	0.0070665	0.0700495	0.0606574	SPINK5/PGC	2	BP
GO:0002775	antimicrobial peptide production	2/401	6/17910	0.0070665	0.0700495	0.0606574	SPINK5/PGC	2	BP
GO:0002778	antibacterial peptide production	2/401	6/17910	0.0070665	0.0700495	0.0606574	SPINK5/PGC	2	BP
GO:0003097	renal water transport	2/401	6/17910	0.0070665	0.0700495	0.0606574	AQP1/AQP3	2	BP
GO:0006751	glutathione catabolic process	2/401	6/17910	0.0070665	0.0700495	0.0606574	GGT6/GGTLC1	2	BP
GO:0010994	free ubiquitin chain polymerization	2/401	6/17910	0.0070665	0.0700495	0.0606574	UBE2C/UBE2S	2	BP
GO:0015793	glycerol transport	2/401	6/17910	0.0070665	0.0700495	0.0606574	AQP1/AQP3	2	BP
GO:0030952	establishment or maintenance of cytoskeleton polarity	2/401	6/17910	0.0070665	0.0700495	0.0606574	KIF2C/AQP1	2	BP
GO:0035519	protein K29-linked ubiquitination	2/401	6/17910	0.0070665	0.0700495	0.0606574	UBE2T/UBE2S	2	BP
GO:0061518	microglial cell proliferation	2/401	6/17910	0.0070665	0.0700495	0.0606574	IL33/CLU	2	BP
GO:1900262	regulation of DNA-directed DNA polymerase activity	2/401	6/17910	0.0070665	0.0700495	0.0606574	DSCC1/RFC4	2	BP
GO:1900264	positive regulation of DNA-directed DNA polymerase activity	2/401	6/17910	0.0070665	0.0700495	0.0606574	DSCC1/RFC4	2	BP
GO:1902412	regulation of mitotic cytokinesis	2/401	6/17910	0.0070665	0.0700495	0.0606574	KIF20B/INCENP	2	BP
GO:2000371	regulation of DNA topoisomerase (ATP-hydrolyzing) activity	2/401	6/17910	0.0070665	0.0700495	0.0606574	NCAPH/UHRF1	2	BP
GO:2000373	positive regulation of DNA topoisomerase (ATP-hydrolyzing) activity	2/401	6/17910	0.0070665	0.0700495	0.0606574	NCAPH/UHRF1	2	BP
GO:0036148	phosphatidylglycerol acyl-chain remodeling	3/401	18/17910	0.00707947	0.0700495	0.0606574	PLA2G4F/PLA2G10/PLA2G1B	3	BP
GO:0042772	DNA damage response, signal transduction resulting in transcription	3/401	18/17910	0.00707947	0.0700495	0.0606574	FOXM1/BRCA1/MUC1	3	BP
GO:1904469	positive regulation of tumor necrosis factor secretion	3/401	18/17910	0.00707947	0.0700495	0.0606574	ORM1/LPL/LRRK2	3	BP
GO:0030162	regulation of proteolysis	28/401	762/17910	0.00723608	0.0714545	0.0618741	BIRC5/PBK/PLK1/AURKA/MAGEA3/PTTG1/GCLC/EGLN3/PMAIP1/MELTF/C3/CLEC3B/IL33/DLC1/WFDC2/CPB2/SHH/CPAMD8/AQP1/SPINK5/SPINK1/AGER/CLU/CTSH/LRRK2/SLPI/C7/C4BPA	28	BP
GO:1901565	organonitrogen compound catabolic process	38/401	1123/17910	0.00733019	0.0722379	0.0625524	UBE2C/CDC20/AURKB/PBK/CDK1/CCNB1/PLK1/MMP12/BUB1B/AURKA/FAM83D/HMMR/MAD2L1/UHRF1/KIF14/UCHL1/DTL/UBE2S/PTTG1/GCLC/APOBEC3B/PMAIP1/SPHK1/FBXO5/SKP2/CCNF/ECRG4/IL33/SHH/CLU/SPATA18/CTSH/LRRK2/CHIA/GGT6/CRYM/C4BPA/GGTLC1	38	BP
GO:0090734	site of DNA damage	5/411	65/18675	0.014138	0.0728106	0.0587842	AUNIP/RAD51/TIMELESS/WDR76/ESCO2	5	CC
GO:0001893	maternal placenta development	4/401	35/17910	0.00749148	0.0735309	0.0636721	CTSV/STC1/STC2/GJB2	4	BP
GO:0098534	centriole assembly	4/401	35/17910	0.00749148	0.0735309	0.0636721	PLK4/BRCA1/STIL/WDR62	4	BP
GO:0010638	positive regulation of organelle organization	23/401	591/17910	0.00751082	0.073573	0.0637085	UBE2C/DLGAP5/NEK2/AURKB/CDCA5/CCNB1/SPAG5/AURKA/ESPL1/NUSAP1/CDT1/PFN2/E2F1/PLK4/BRCA1/FEN1/POC1A/PMAIP1/PSRC1/GZMB/SPHK1/MUC1/LRRK2	23	BP
GO:0034644	cellular response to UV	6/401	77/17910	0.0075629	0.0739349	0.064022	AURKB/PBK/CHEK1/CDC25A/AQP1/MFAP4	6	BP
GO:0018107	peptidyl-threonine phosphorylation	7/401	101/17910	0.00760117	0.0741607	0.0642174	TTK/CDK1/PLK1/CHEK1/HASPIN/SPHK1/LRRK2	7	BP
GO:0032722	positive regulation of chemokine production	5/401	55/17910	0.00762653	0.0742599	0.0643033	IL33/LPL/AGER/CHIA/ALOX15B	5	BP
GO:0000400	four-way junction DNA binding	3/390	16/16967	0.00540167	0.075935	0.0670288	XRCC2/BLM/HMGB2	3	MF
GO:0097386	glial cell projection	3/411	24/18675	0.0151988	0.077499	0.0625695	GJB2/SCN7A/AQP4	3	CC
GO:0001939	female pronucleus	2/411	9/18675	0.0157021	0.0785105	0.0633861	CCNA2/SLC2A1	2	CC
GO:0031618	nuclear pericentric heterochromatin	2/411	9/18675	0.0157021	0.0785105	0.0633861	CENPA/ESCO2	2	CC
GO:0001832	blastocyst growth	3/401	19/17910	0.00826908	0.0796891	0.0690046	GINS1/NCAPG2/GINS4	3	BP
GO:0007095	mitotic G2 DNA damage checkpoint	3/401	19/17910	0.00826908	0.0796891	0.0690046	CDK1/CLSPN/BLM	3	BP
GO:0019370	leukotriene biosynthetic process	3/401	19/17910	0.00826908	0.0796891	0.0690046	GGT6/PLA2G1B/GGTLC1	3	BP
GO:0034104	negative regulation of tissue remodeling	3/401	19/17910	0.00826908	0.0796891	0.0690046	GREM1/AGER/CLDN18	3	BP
GO:0046599	regulation of centriole replication	3/401	19/17910	0.00826908	0.0796891	0.0690046	PLK4/BRCA1/STIL	3	BP
GO:0051973	positive regulation of telomerase activity	4/401	36/17910	0.00828192	0.0796891	0.0690046	NEK2/AURKB/GREM1/PARM1	4	BP
GO:0072562	blood microparticle	8/411	147/18675	0.0162234	0.0803372	0.0648609	SLC2A1/FGB/ORM1/JCHAIN/C3/IGHD/CLU/C4BPA	8	CC
GO:0036293	response to decreased oxygen levels	16/401	365/17910	0.00844196	0.0810694	0.0701998	CCNA2/CCNB1/SLC2A1/E2F1/PLOD2/EIF4EBP1/EGLN3/PMAIP1/STC1/HILPDA/BRIP1/STC2/NDNF/AQP1/AGER/AQP3	16	BP
GO:0032642	regulation of chemokine production	6/401	79/17910	0.00854406	0.081889	0.0709096	APOD/IL33/LPL/AGER/CHIA/ALOX15B	6	BP
GO:0005044	scavenger receptor activity	5/390	51/16967	0.00617179	0.0851242	0.0751402	PRG4/AGER/TMPRSS2/DMBT1/SUSD2	5	MF
GO:0009792	embryo development ending in birth or egg hatching	23/401	600/17910	0.00891482	0.0852752	0.0738418	NEK2/CCNB2/CCNB1/GINS1/ASF1B/CENPU/PLK4/XRCC2/NCAPG2/COL11A1/FOSL1/E2F8/STIL/GINS4/CTHRC1/E2F7/KIF20B/DLC1/SHH/SLC34A2/ADGRF5/HOPX/FOLR1	23	BP
GO:0033993	response to lipid	31/401	883/17910	0.00909929	0.0864406	0.0748509	CCNA2/CCNB1/CTSV/CCNE1/E2F1/TYMS/BRCA1/FOSL1/CXCL10/EIF4EBP1/EZH2/KIF18A/STC1/CXCL8/ABCC2/STC2/HMGB2/SKP2/GJB2/SCGB2A1/LPL/AQP1/LMO3/CLU/HPGD/CTSH/ABCA3/SLPI/AQP3/ALPL/SCGB1A1	31	BP
GO:0031667	response to nutrient levels	19/401	466/17910	0.00911095	0.0864406	0.0748509	SLC2A1/CTSV/TYMS/CXCL10/GCLC/EIF4EBP1/PMAIP1/STC1/BRIP1/SLC16A1/STC2/LPL/LRRK2/FOXA2/AQP3/ALPL/SLC22A3/SCTR/FOLR1	19	BP
GO:0010955	negative regulation of protein processing	4/401	37/17910	0.00912507	0.0864406	0.0748509	MAGEA3/CPB2/LRRK2/C4BPA	4	BP
GO:0060236	regulation of mitotic spindle organization	4/401	37/17910	0.00912507	0.0864406	0.0748509	TPX2/PLK1/TACC3/PSRC1	4	BP
GO:1903318	negative regulation of protein maturation	4/401	37/17910	0.00912507	0.0864406	0.0748509	MAGEA3/CPB2/LRRK2/C4BPA	4	BP
GO:0005539	glycosaminoglycan binding	11/390	199/16967	0.00644495	0.0872456	0.0770128	HMMR/COL11A1/CXCL10/JCHAIN/SERPIND1/CLEC3B/LPL/ADAMTS8/NDNF/SHH/HABP2	11	MF
GO:0002685	regulation of leukocyte migration	10/401	186/17910	0.00930037	0.0877611	0.0759943	CXCL10/GREM1/CXCL8/APOD/IL33/CXCL14/MMP28/CXCL17/AGER/VEGFD	10	BP
GO:0050920	regulation of chemotaxis	10/401	186/17910	0.00930037	0.0877611	0.0759943	CXCL10/GREM1/CXCL8/TUBB2B/SEMA3A/CXCL14/MMP28/CXCL17/AGER/VEGFD	10	BP
GO:0002688	regulation of leukocyte chemotaxis	7/401	105/17910	0.00932862	0.087858	0.0760782	CXCL10/GREM1/CXCL8/CXCL14/MMP28/CXCL17/VEGFD	7	BP
GO:0071384	cellular response to corticosteroid stimulus	5/401	58/17910	0.00951505	0.0890551	0.0771149	EIF4EBP1/STC1/ABCC2/GJB2/AQP1	5	BP
GO:0006817	phosphate ion transport	3/401	20/17910	0.00956906	0.0890551	0.0771149	ADAMTS8/ROS1/SLC34A2	3	BP
GO:0045682	regulation of epidermis development	6/401	81/17910	0.00961329	0.0890551	0.0771149	CTSV/EZH2/GAL/SPINK5/ALOX15B/AQP3	6	BP
GO:0006265	DNA topological change	2/401	7/17910	0.00974724	0.0890551	0.0771149	TOP2A/HMGB2	2	BP
GO:0009157	deoxyribonucleoside monophosphate biosynthetic process	2/401	7/17910	0.00974724	0.0890551	0.0771149	TK1/TYMS	2	BP
GO:0010992	ubiquitin recycling	2/401	7/17910	0.00974724	0.0890551	0.0771149	UBE2C/UBE2S	2	BP
GO:0035405	histone-threonine phosphorylation	2/401	7/17910	0.00974724	0.0890551	0.0771149	CHEK1/HASPIN	2	BP
GO:0051305	chromosome movement towards spindle pole	2/401	7/17910	0.00974724	0.0890551	0.0771149	DLGAP5/CENPE	2	BP
GO:0060717	chorion development	2/401	7/17910	0.00974724	0.0890551	0.0771149	E2F8/E2F7	2	BP
GO:0090232	positive regulation of spindle checkpoint	2/401	7/17910	0.00974724	0.0890551	0.0771149	NDC80/MAD2L1	2	BP
GO:0090240	positive regulation of histone H4 acetylation	2/401	7/17910	0.00974724	0.0890551	0.0771149	BRCA1/MUC1	2	BP
GO:0090267	positive regulation of mitotic cell cycle spindle assembly checkpoint	2/401	7/17910	0.00974724	0.0890551	0.0771149	NDC80/MAD2L1	2	BP
GO:1900004	negative regulation of serine-type endopeptidase activity	2/401	7/17910	0.00974724	0.0890551	0.0771149	SPINK5/SPINK1	2	BP
GO:1901857	positive regulation of cellular respiration	2/401	7/17910	0.00974724	0.0890551	0.0771149	CDK1/CCNB1	2	BP
GO:1902572	negative regulation of serine-type peptidase activity	2/401	7/17910	0.00974724	0.0890551	0.0771149	SPINK5/SPINK1	2	BP
GO:2000535	regulation of entry of bacterium into host cell	2/401	7/17910	0.00974724	0.0890551	0.0771149	KRT6A/CXCL8	2	BP
GO:2000278	regulation of DNA biosynthetic process	7/401	106/17910	0.00980198	0.0893882	0.0774033	NEK2/AURKB/DSCC1/RFC4/GREM1/PIF1/PARM1	7	BP
GO:0009893	positive regulation of metabolic process	93/401	3313/17910	0.00992693	0.0903591	0.078244	MYBL2/UBE2C/TPX2/CDC20/TOP2A/DLGAP5/FOXM1/NEK2/AURKB/CDC6/CCNA2/TTK/CDK1/CCNB1/PLK1/MMP12/AURKA/CCNE1/FGB/IQGAP3/CDT1/UHRF1/KIF14/CDCA2/DSCC1/PFN2/DTL/E2F1/CLSPN/CENPE/CHEK1/UBE2S/ATAD2/ECT2/RAD51/HMGA1/NCAPG2/BRCA1/FOSL1/FANCI/E2F8/RFC4/CXCL10/GCLC/ARNTL2/EZH2/CKS2/EGLN3/CDC7/PMAIP1/PSRC1/CKS1B/E2F2/MELTF/GAL/GREM1/TIMELESS/E2F7/DBF4/SEMA3A/BLM/HMGB2/SPHK1/SKP2/JCHAIN/C3/HAS3/MUC1/ZNF750/CLEC3B/…	93	BP
GO:2000060	positive regulation of ubiquitin-dependent protein catabolic process	6/401	82/17910	0.0101822	0.0925103	0.0801068	PLK1/AURKA/GCLC/IL33/CLU/LRRK2	6	BP
GO:0061900	glial cell activation	5/401	59/17910	0.01021	0.0925911	0.0801768	SPHK1/IL33/AGER/CLU/LRRK2	5	BP
GO:0043933	protein-containing complex subunit organization	61/401	2032/17910	0.0104554	0.0946405	0.0819514	UBE2C/ANLN/KIF2C/CENPA/HJURP/RRM2/KIF18B/CDK1/CCNB1/NDC80/CENPF/SLC2A1/TK1/CENPW/FGB/CDT1/KIF14/ASF1B/MCM2/CENPU/PFN2/CENPE/UBE2S/OIP5/ECT2/RAD51/CENPI/HMGA1/COL11A1/FOSL1/CENPM/EIF4EBP1/STMN1/POLQ/KNL1/TICRR/CENPK/DIAPH3/PMAIP1/PSRC1/GREM1/KIF18A/CENPN/HELLS/CENPH/BLM/CHAF1B/HMGB2/FBXO5/KNTC1/CLGN/JCHAIN/LPL/CLU/ELN/LRRK2/AQP4/HOPX/GJB1/AQP5/FOLR1	61	BP
GO:0005916	fascia adherens	2/411	10/18675	0.0193447	0.0948811	0.076603	DSP/DES	2	CC
GO:0001701	in utero embryonic development	15/401	342/17910	0.0105227	0.095074	0.0823268	NEK2/CCNB2/CCNB1/GINS1/ASF1B/PLK4/XRCC2/NCAPG2/FOSL1/E2F8/STIL/GINS4/E2F7/SLC34A2/HOPX	15	BP
GO:0015168	glycerol transmembrane transporter activity	2/390	6/16967	0.00743544	0.0953562	0.0841722	AQP1/AQP3	2	MF
GO:0036374	glutathione hydrolase activity	2/390	6/16967	0.00743544	0.0953562	0.0841722	GGT6/GGTLC1	2	MF
GO:0070324	thyroid hormone binding	2/390	6/16967	0.00743544	0.0953562	0.0841722	CTSH/CRYM	2	MF
GO:0030136	clathrin-coated vesicle	9/411	182/18675	0.0196542	0.09549	0.0770946	HLA-DQB2/SFTA3/CD207/SFTPD/FOLR1/SFTPA2/SFTPA1/SFTPC/SFTPB	9	CC
GO:0004866	endopeptidase inhibitor activity	9/390	149/16967	0.00759017	0.0956623	0.0844424	BIRC5/PTTG1/C3/SERPIND1/WFDC2/CPAMD8/SPINK5/SPINK1/SLPI	9	MF
GO:0031461	cullin-RING ubiquitin ligase complex	7/411	124/18675	0.019899	0.0957757	0.0773253	UBE2C/CDC20/BUB1B/DTL/UBE2S/SKP2/CCNF	7	CC
GO:0044265	cellular macromolecule catabolic process	34/401	1003/17910	0.0106691	0.0962187	0.083318	UBE2C/CDC20/AURKB/PBK/CDK1/CCNB1/PLK1/MMP12/BUB1B/AURKA/IGF2BP3/MAD2L1/UHRF1/KIF14/UCHL1/DTL/E2F1/UBE2S/PTTG1/GCLC/FEN1/IGF2BP2/PMAIP1/HMGB2/FBXO5/SKP2/CCNF/ECRG4/IL33/SHH/CLU/SPATA18/LRRK2/SCGB1A1	34	BP
GO:0071548	response to dexamethasone	4/401	39/17910	0.0109746	0.0986707	0.0854413	EIF4EBP1/ABCC2/GJB2/AQP1	4	BP
GO:0036150	phosphatidylserine acyl-chain remodeling	3/401	21/17910	0.0109814	0.0986707	0.0854413	PLA2G4F/PLA2G10/PLA2G1B	3	BP
